# Supplementary material for: A novel approach to bis(1,3-azol-2-yl)acetonitriles and bis(1,3-azol-2-yl)methanes via the [3 + 2]-dipolar cycloaddition of imidazole N-oxides and 2-heteroaryl-3,3-dimethylacrylonitriles
Source: Royal Society of Chemistry journal article supplement (doi:10.1039/d1ob01441b), 2021-01-01
Supplement: d1ob01441b1.pdf [file d1ob01441b1.pdf]

# Organic & Biomolecular Chemistry

Electronic supplementary information

## **A novel approach to bis(1,3-azol-2-yl)acetonitriles and bis(1,3-azol-2-yl)methanes *via* [3+2]-dipolar cycloaddition of imidazole *N*-oxides and 2-heteroaryl-3,3-dimethylacrylonitriles**

Anton V. Kutasevich,<sup>[a]</sup> Anton S. Niktarov,<sup>[a]</sup> Ekaterina S. Uvarova,<sup>[a]</sup> Valentina A. Karnoukhova<sup>[b]</sup> and Vitaly S. Mityanov\*<sup>[a]</sup>

[a] Department of Fine Organic Synthesis and Chemistry of Dyes  
Mendeleev University of Chemical Technology  
Miusskaya Sq., 9, Moscow 125047, Russian Federation  
<http://muctr.ru>  
*E-mail:* [mityanovvs@yandex.ru](mailto:mityanovvs@yandex.ru)

[b] A.N. Nesmeyanov Institute of Organoelement Compounds of Russian  
Academy of Sciences  
Vavilova St. 28, Moscow, 119991, Russian Federation  
<https://ineos.ac.ru>

## Table of contents

1. Copies of  $^1\text{H}$  and  $^{13}\text{C}$  NMR spectra.
2. X-ray diffraction data.

# 1-isopropyl-4,5-dimethyl-1H-imidazole 3-oxide (**1b**)

$^1\text{H}$  NMR (300 MHz,  $\text{DMSO-}d_6$ )

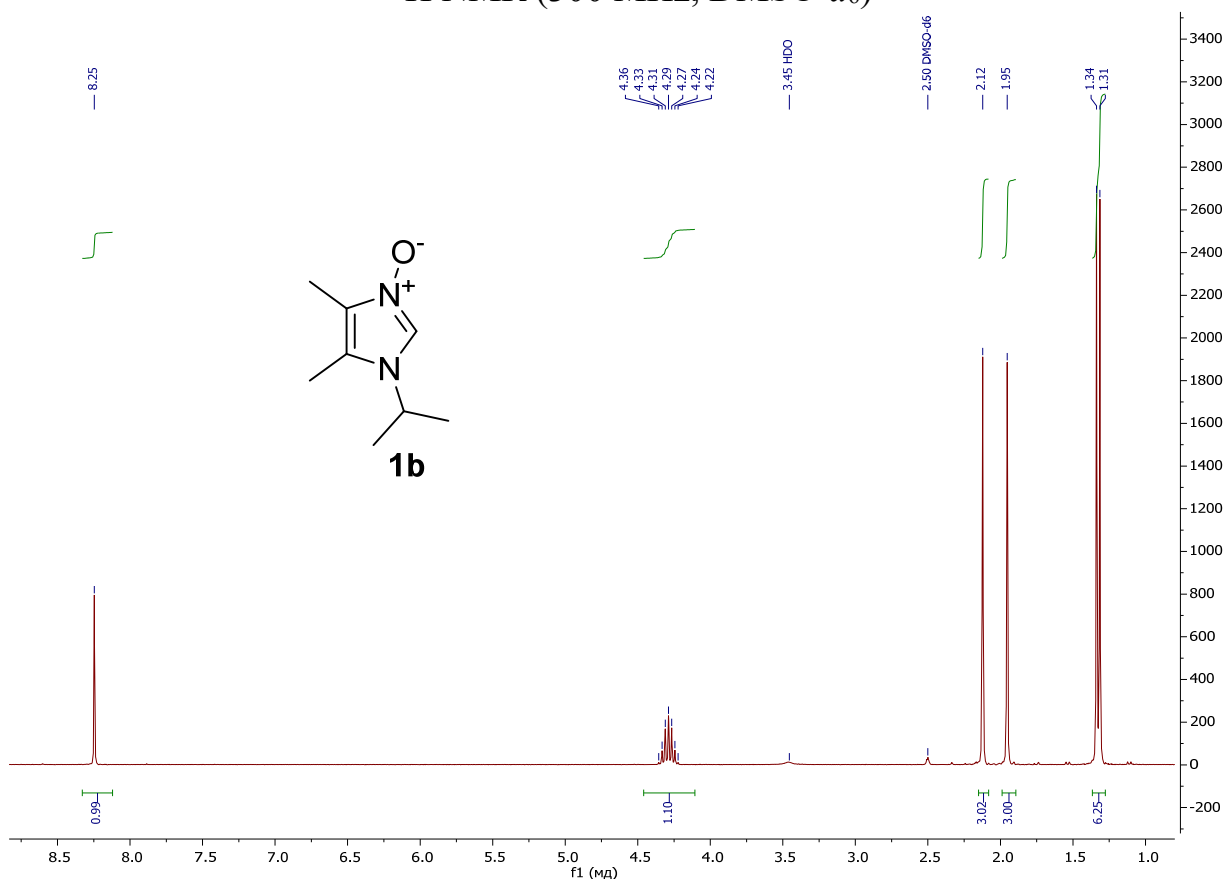

$^{13}\text{C}$  NMR (75 MHz,  $\text{DMSO-}d_6$ )

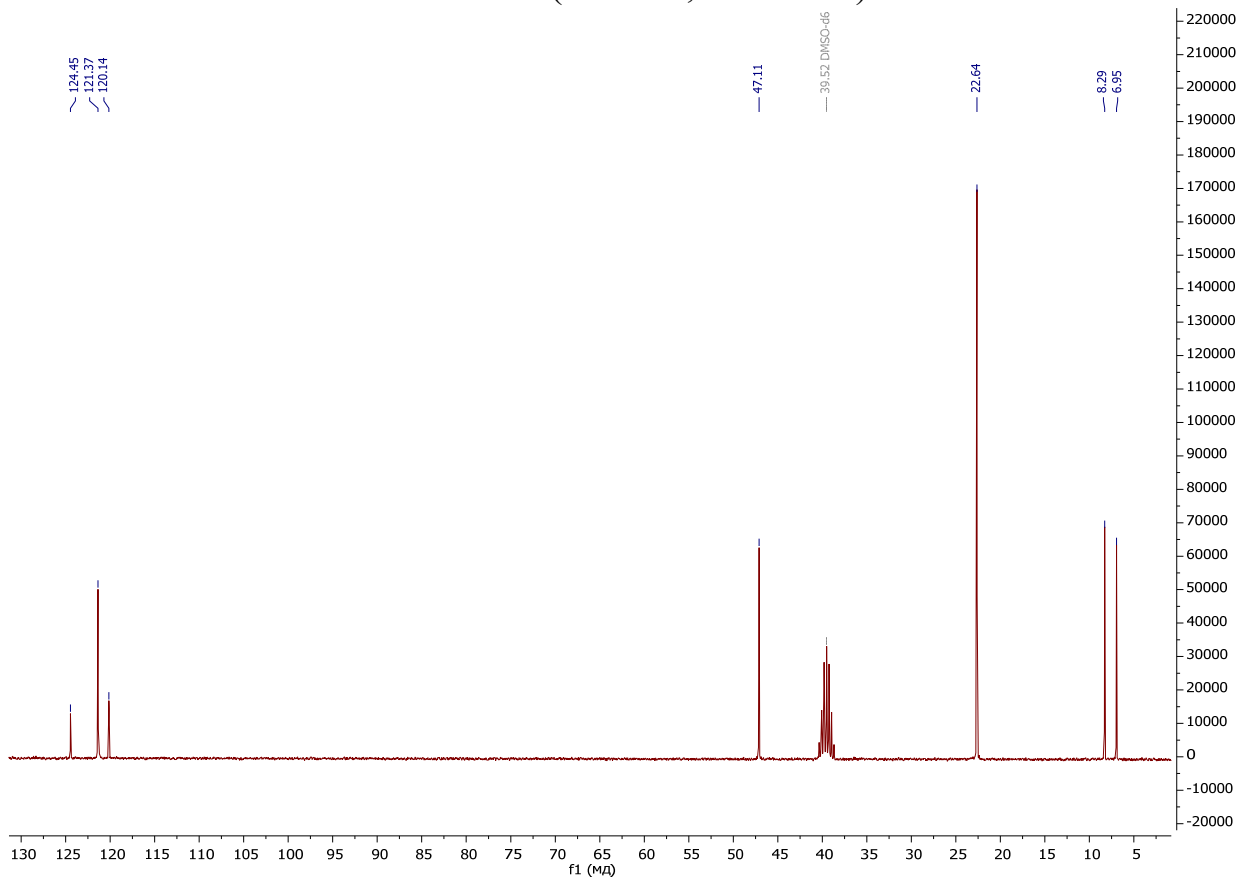

### 3-Methyl-2-(4-phenylthiazol-2-yl)but-2-enitrile (**4a**)

$^1\text{H}$  NMR (600 MHz,  $\text{DMSO-}d_6$ )

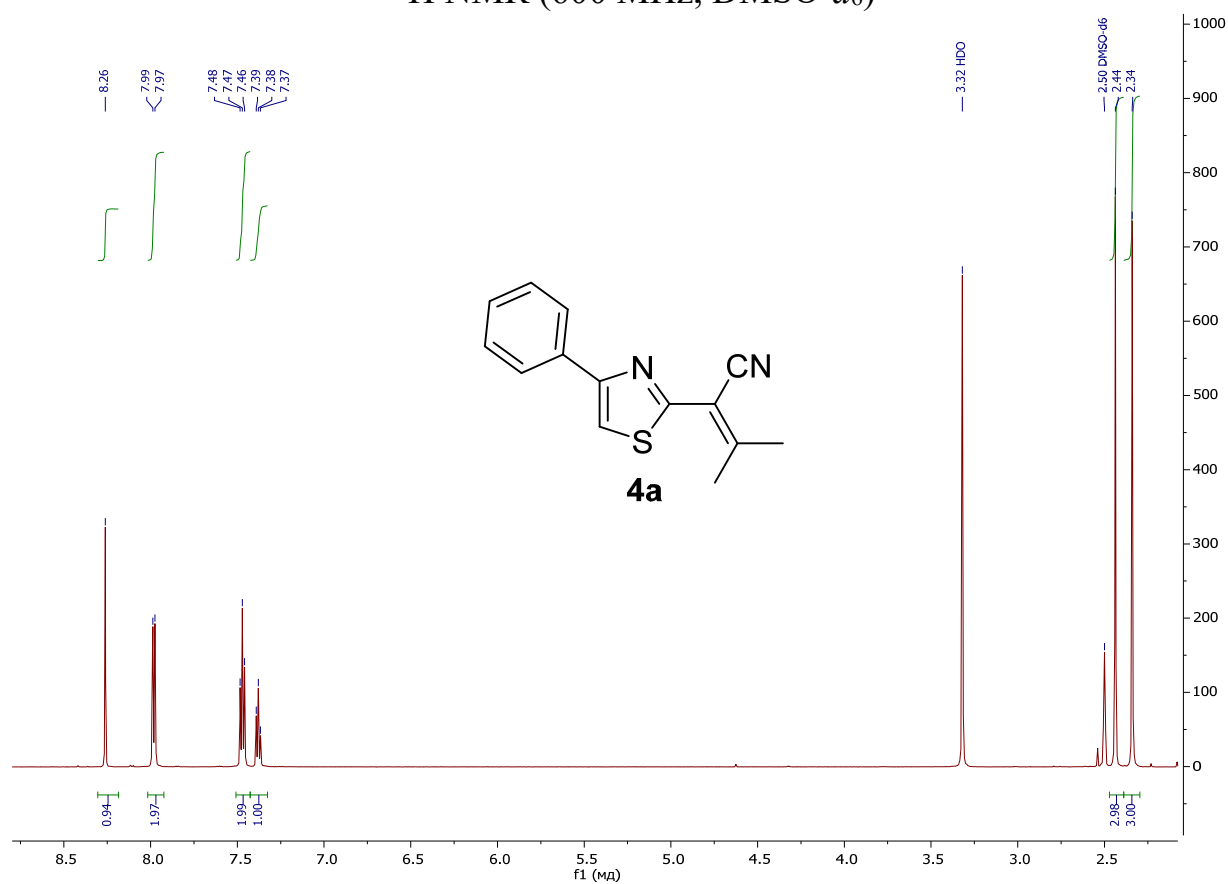

$^{13}\text{C}$  NMR (151 MHz,  $\text{DMSO-}d_6$ )

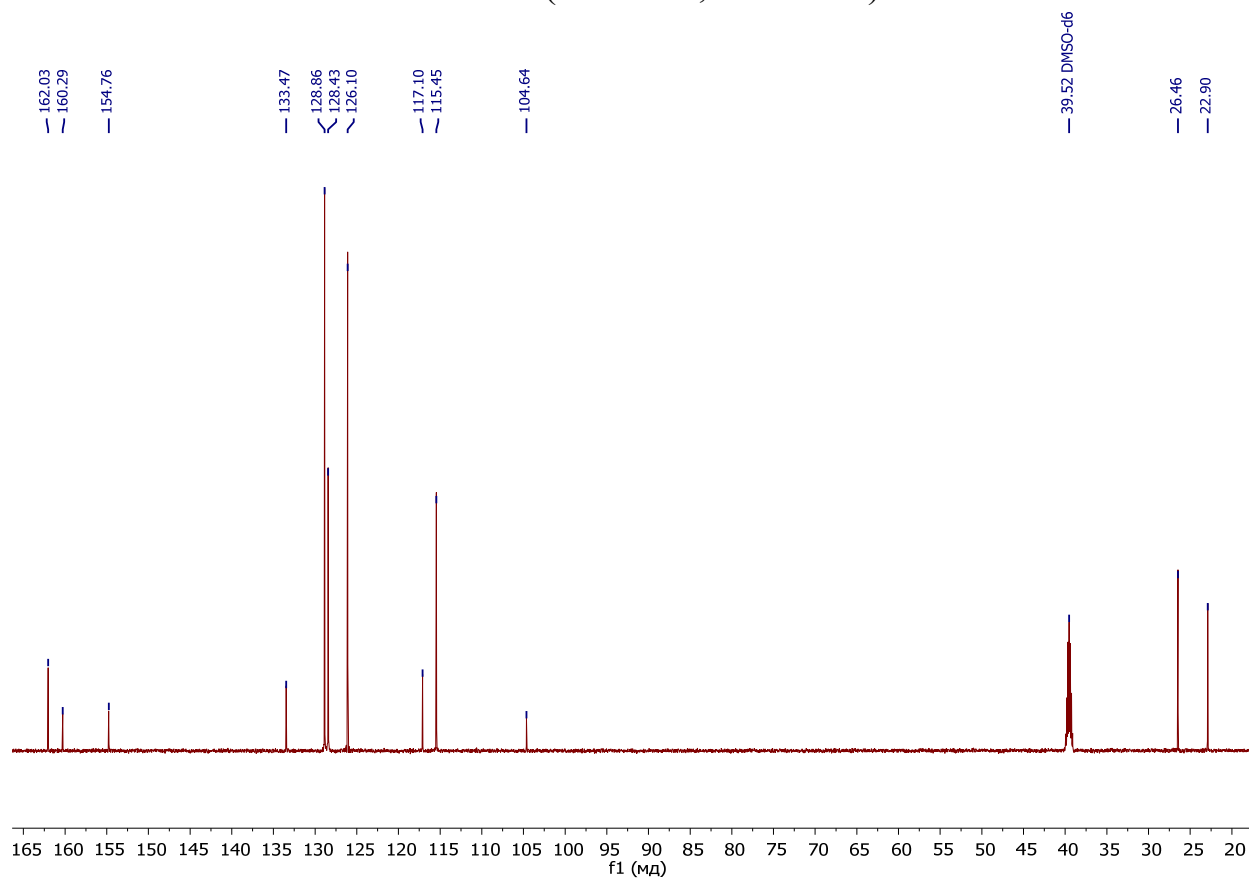

# 3-Methyl-2-(4-(naphthalen-2-yl)thiazol-2-yl)but-2-enitrile (**4b**)

$^1\text{H}$  NMR (300 MHz,  $\text{DMSO-}d_6$ )

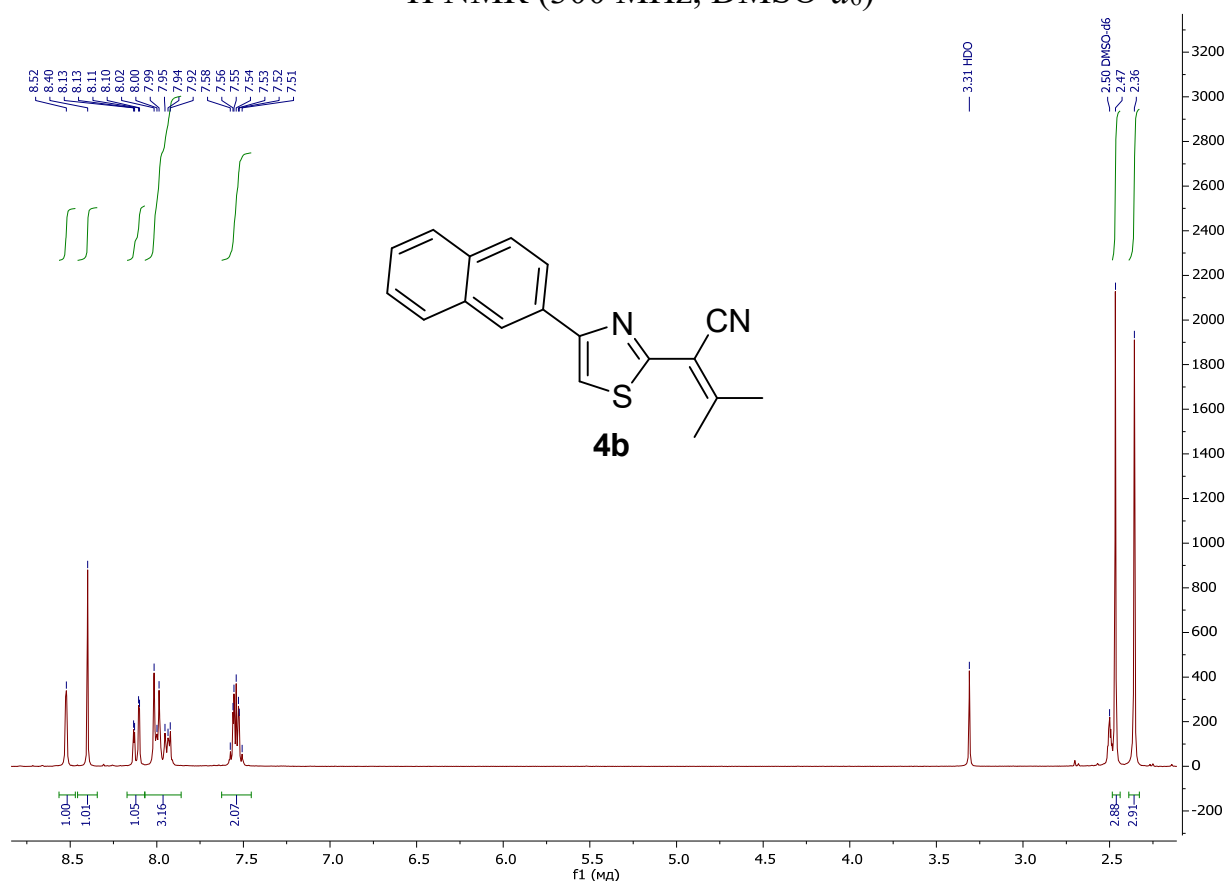

$^{13}\text{C}$  NMR (75 MHz,  $\text{DMSO-}d_6$ )

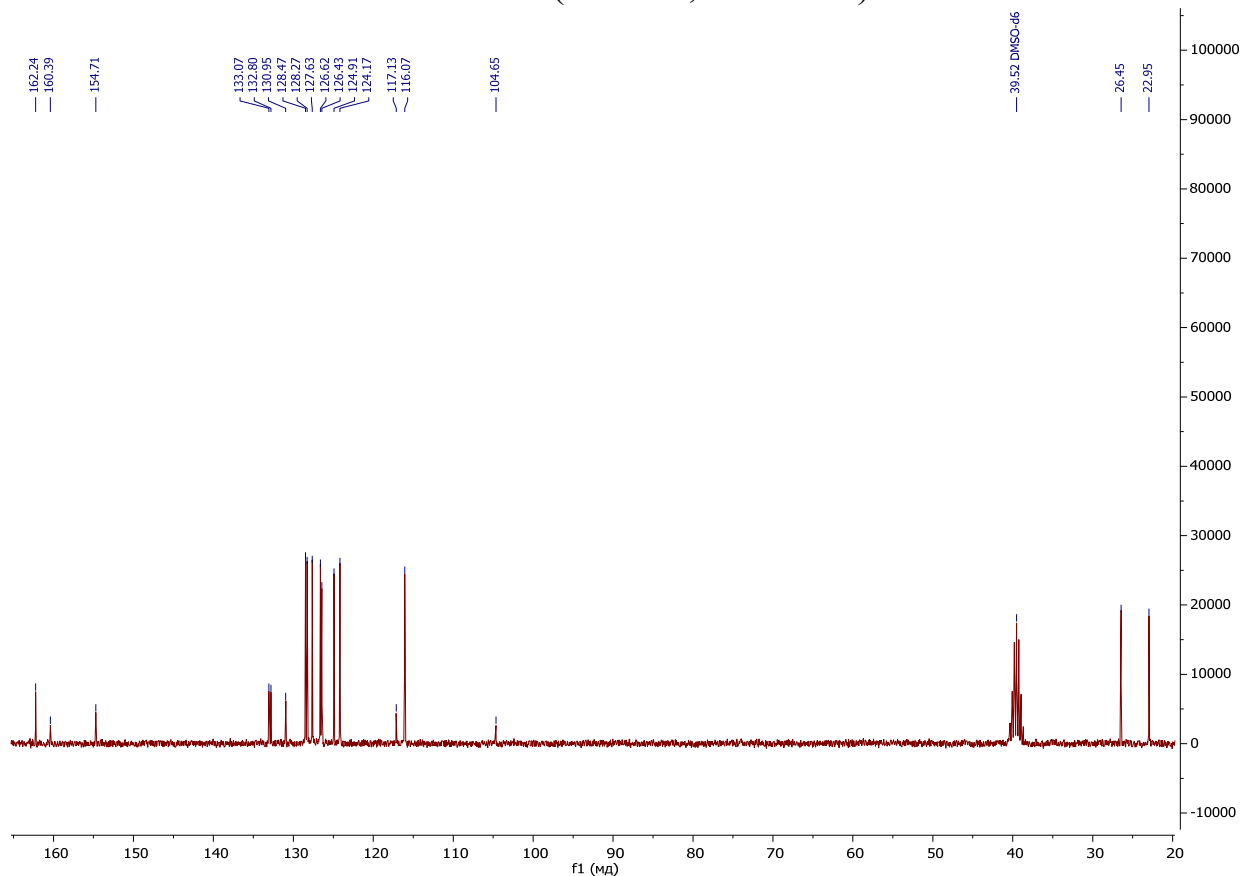

# 3-Methyl-2-(4-(3-nitrophenyl)thiazol-2-yl)but-2-enitrile (**4c**)

$^1\text{H}$  NMR (300 MHz,  $\text{DMSO-}d_6$ )

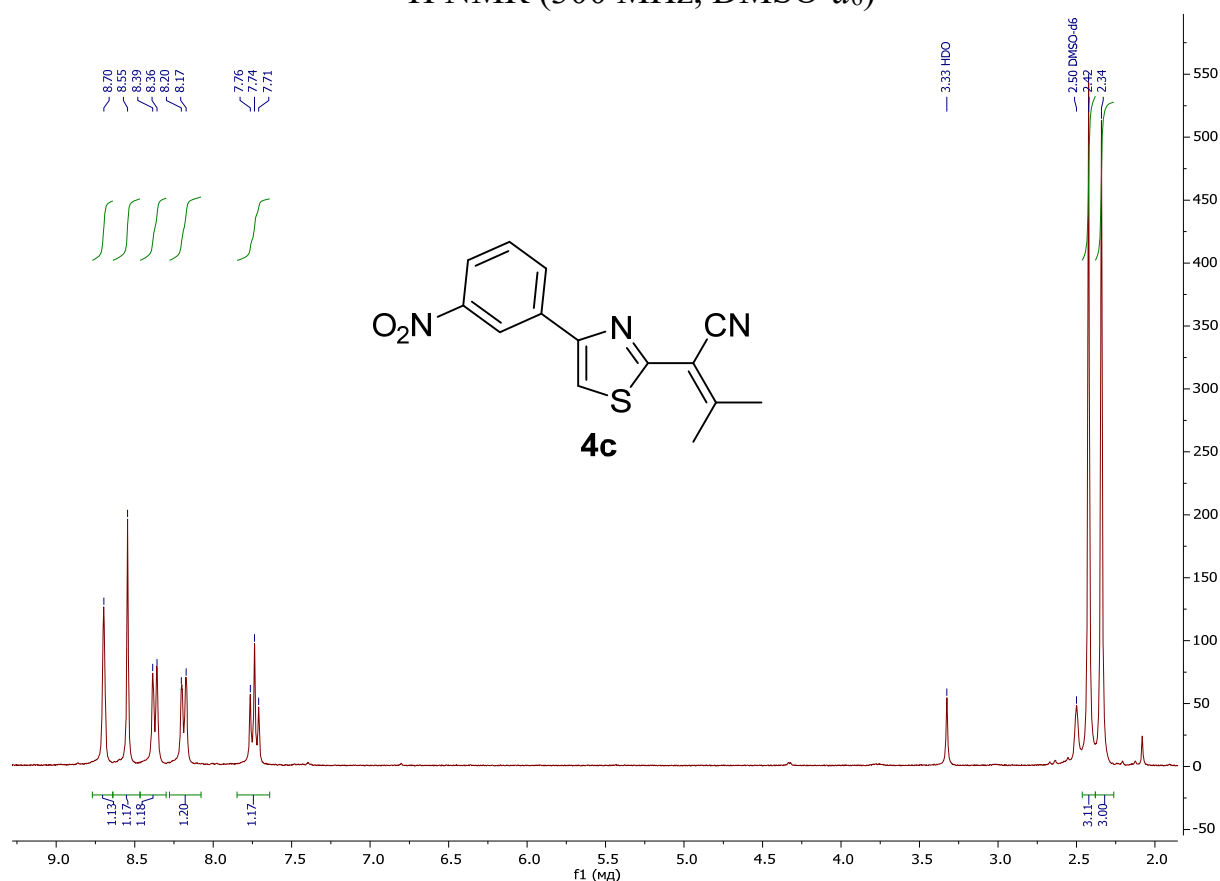

$^{13}\text{C}$  NMR (151 MHz,  $\text{DMSO-}d_6$ )

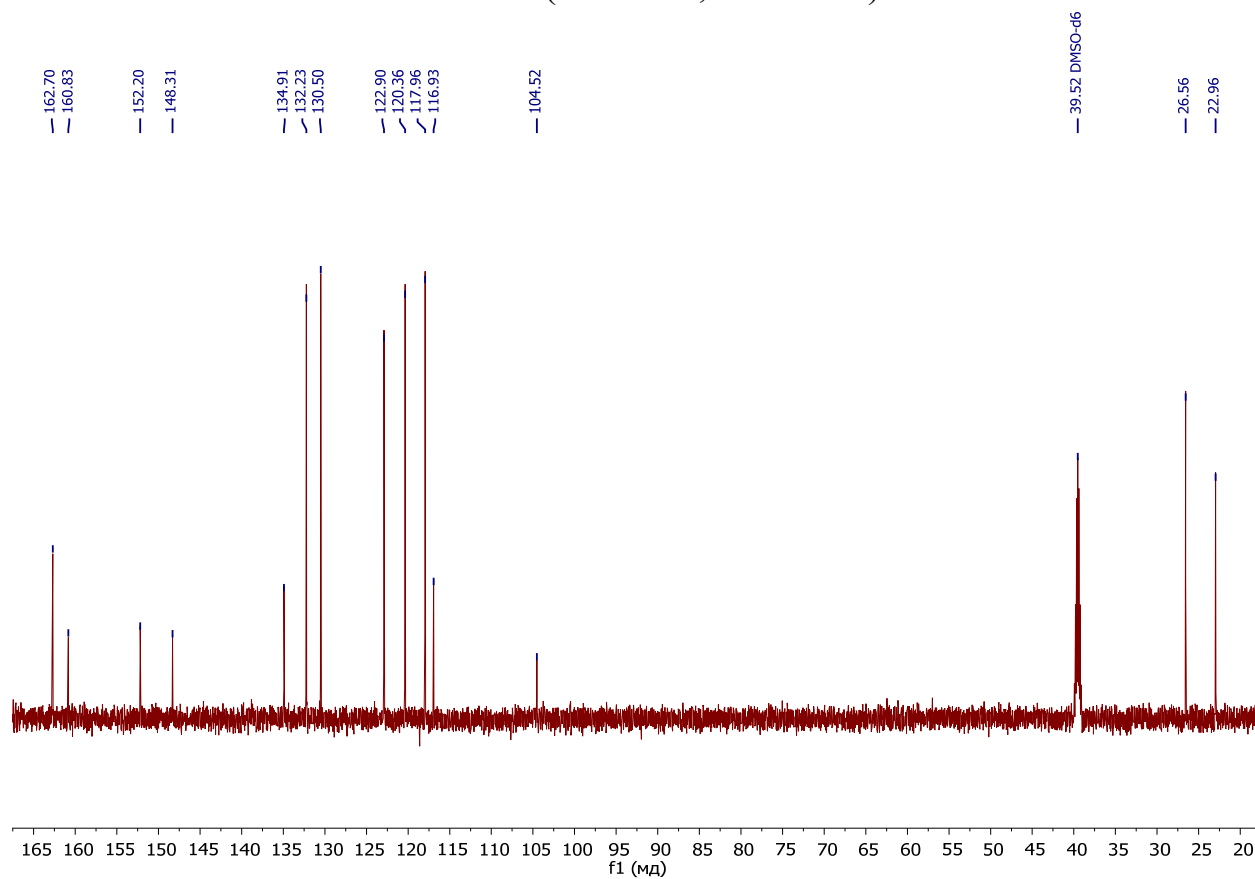

# 3-Methyl-2-(5-methyl-4-phenylthiazol-2-yl)but-2-enitrile (**4d**)

$^1\text{H}$  NMR (400 MHz,  $\text{DMSO-}d_6$ )

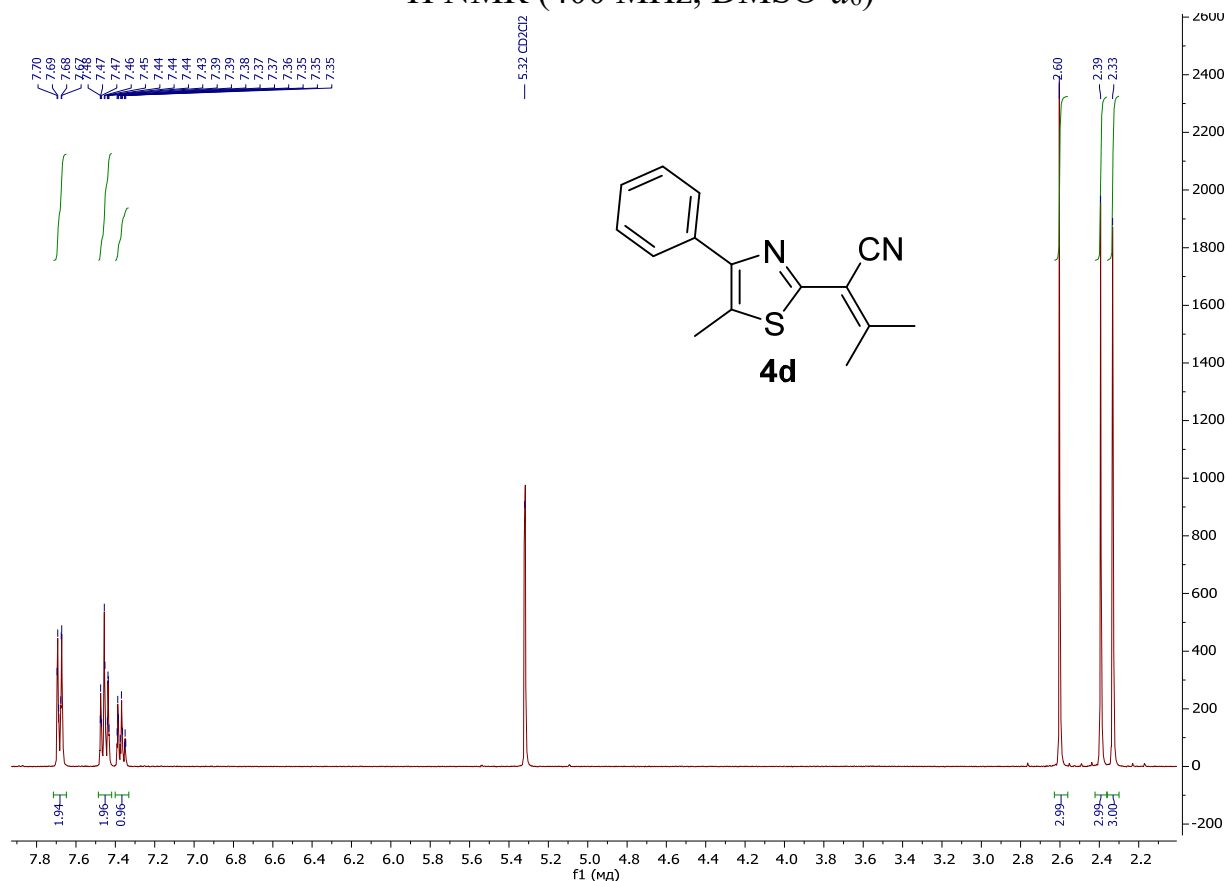

$^{13}\text{C}$  NMR (75 MHz,  $\text{DMSO-}d_6$ )

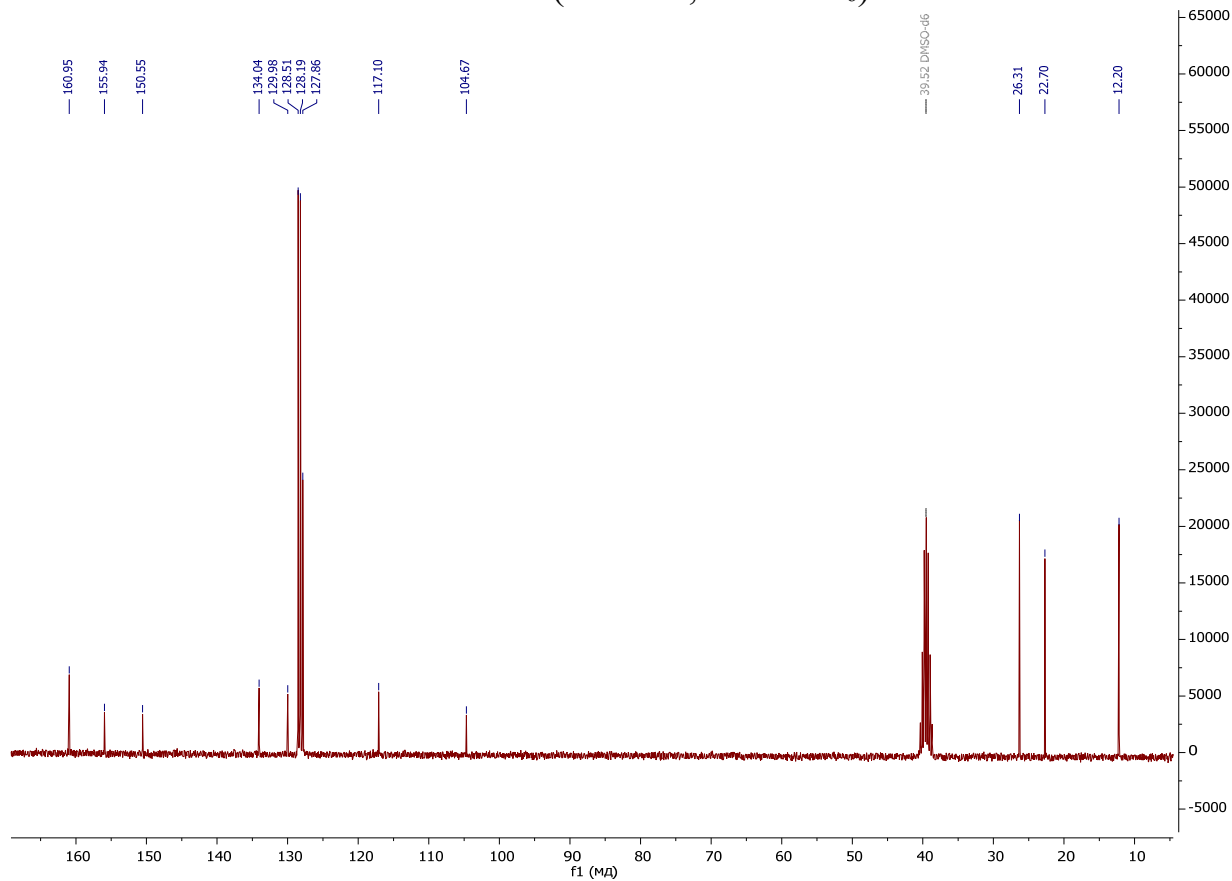

# 2-(Benzo[d]thiazol-2-yl)-3-methylbut-2-enitrile (**4e**)

<sup>1</sup>H NMR (300 MHz, DMSO-*d*<sub>6</sub>)

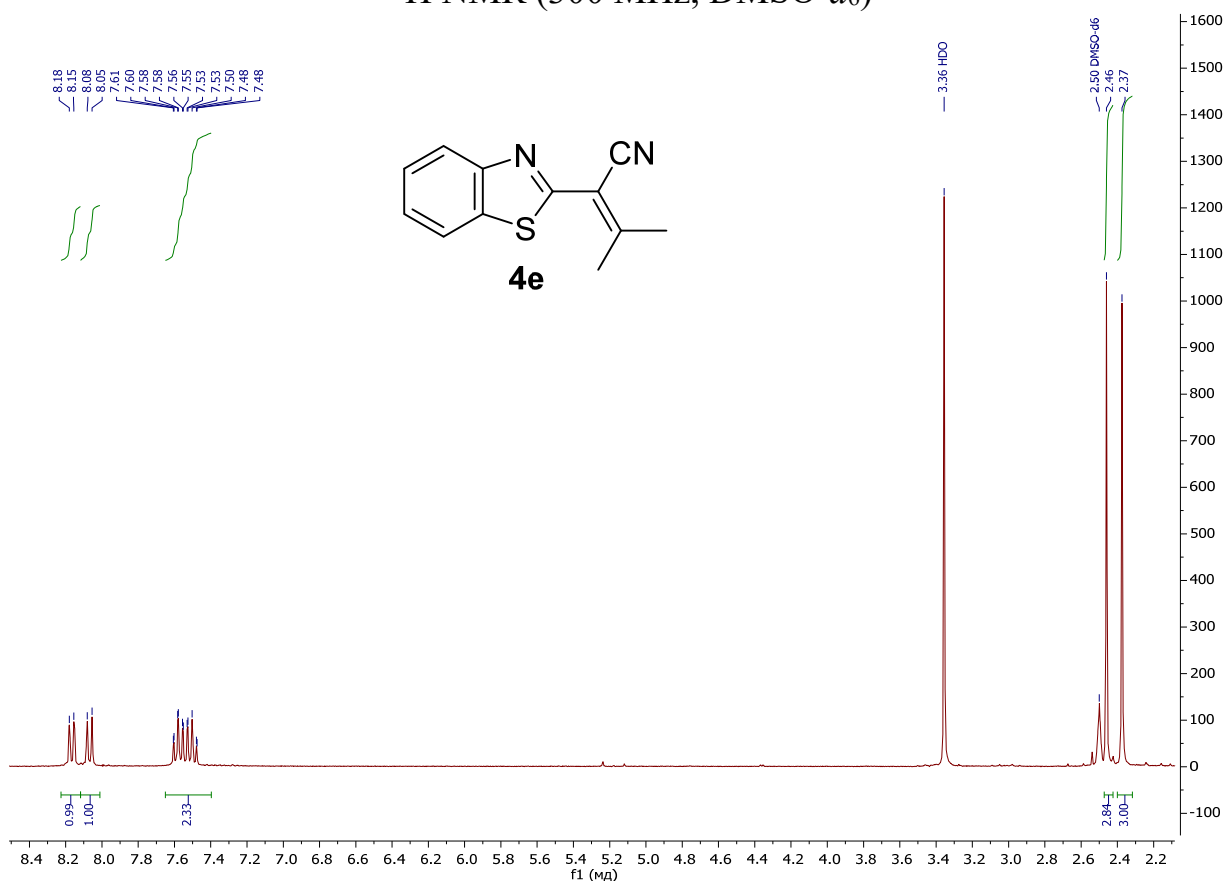

<sup>13</sup>C NMR (151 MHz, DMSO-*d*<sub>6</sub>)

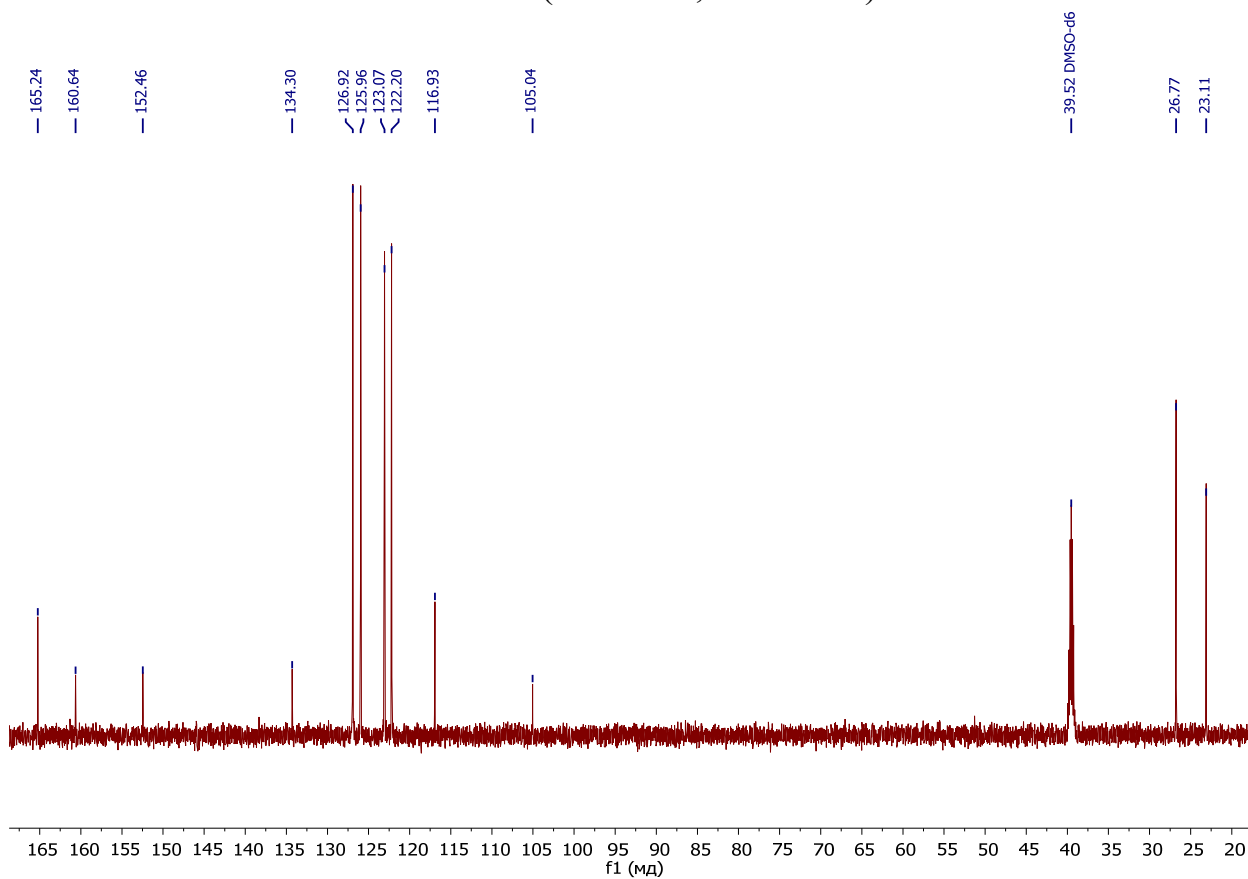



# 2-(1H-Benzo[d]imidazol-2-yl)-3-methylbut-2-enitrile (**4g**)

<sup>1</sup>H NMR (300 MHz, DMSO-*d*<sub>6</sub>)

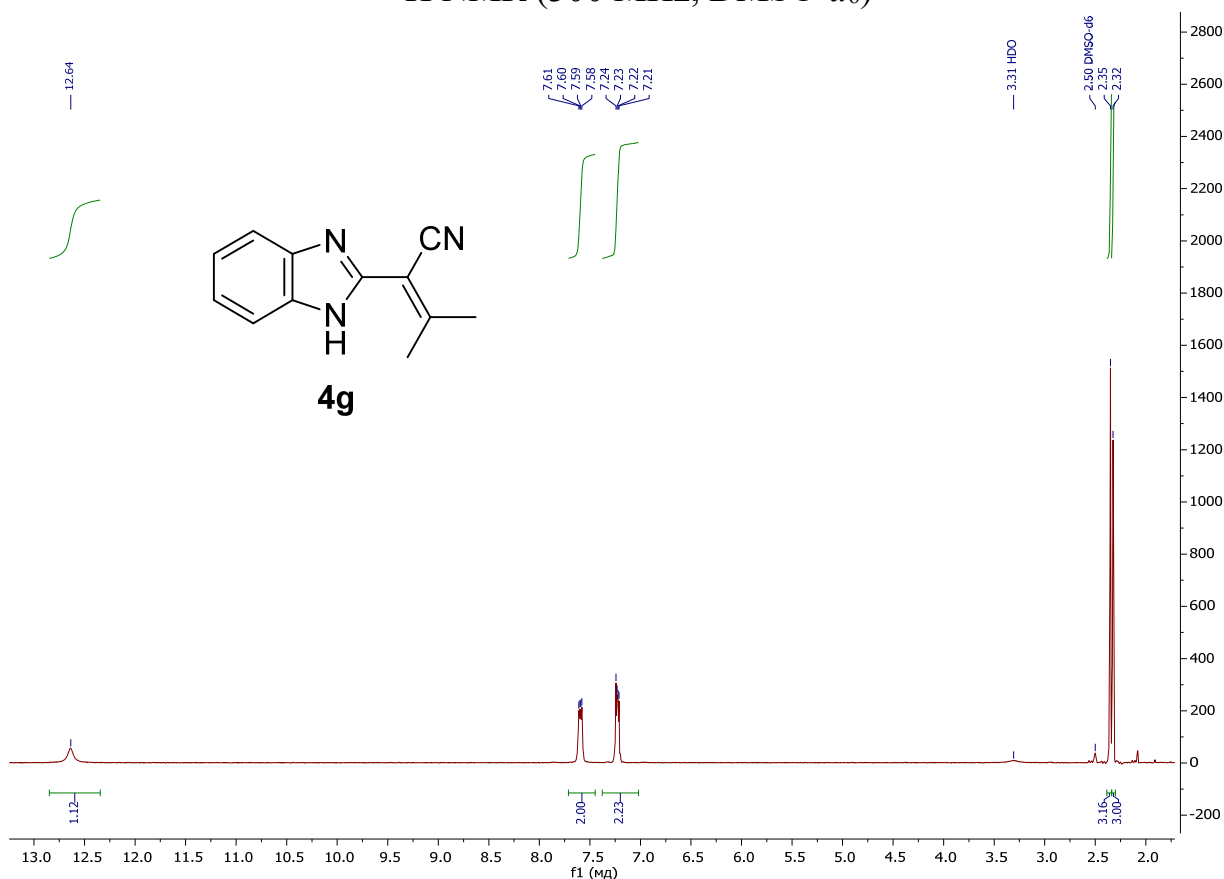

<sup>13</sup>C NMR (151 MHz, DMSO-*d*<sub>6</sub>)

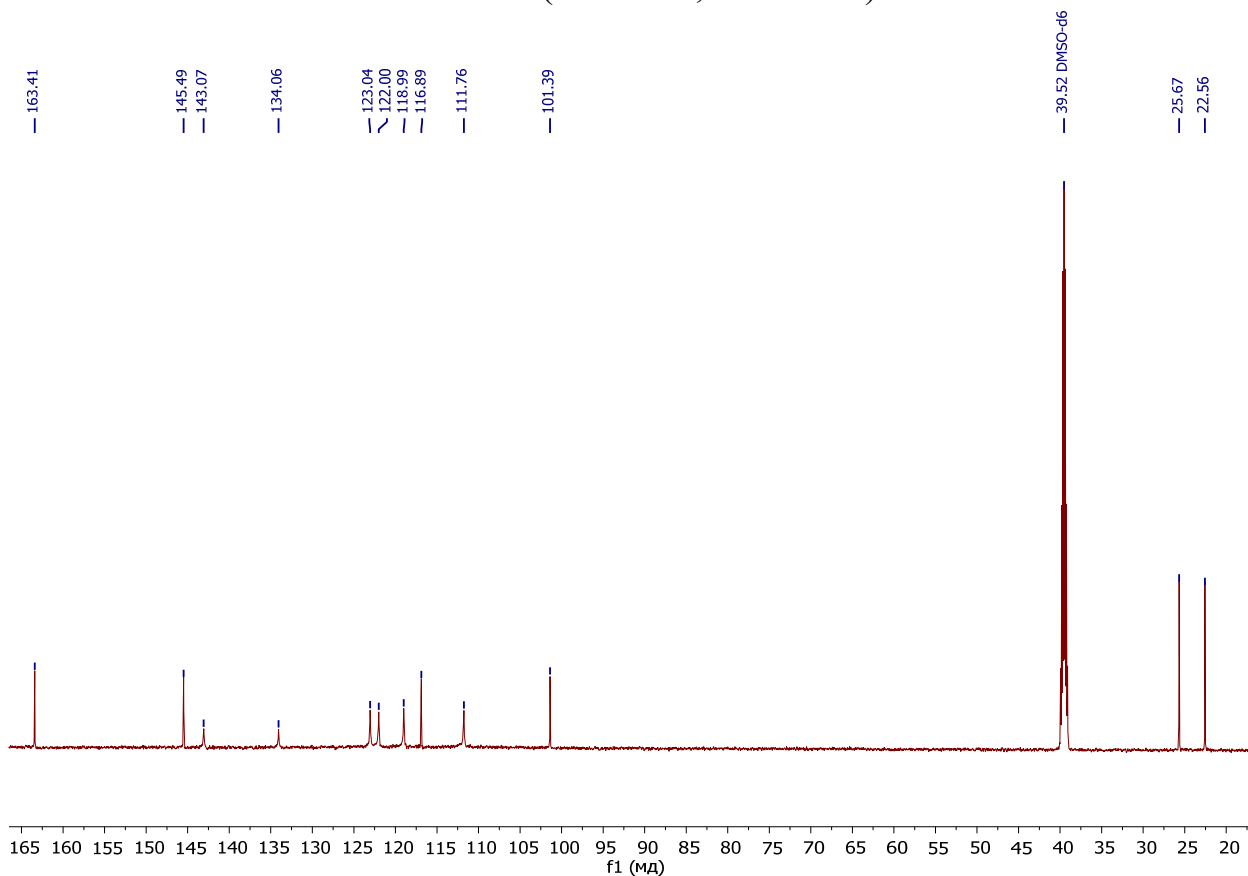

# 2-(Benzo[d]oxazol-2-yl)-3-methylbut-2-enenitrile (**4h**)

$^1\text{H}$  NMR (400 MHz,  $\text{DMSO-}d_6$ )

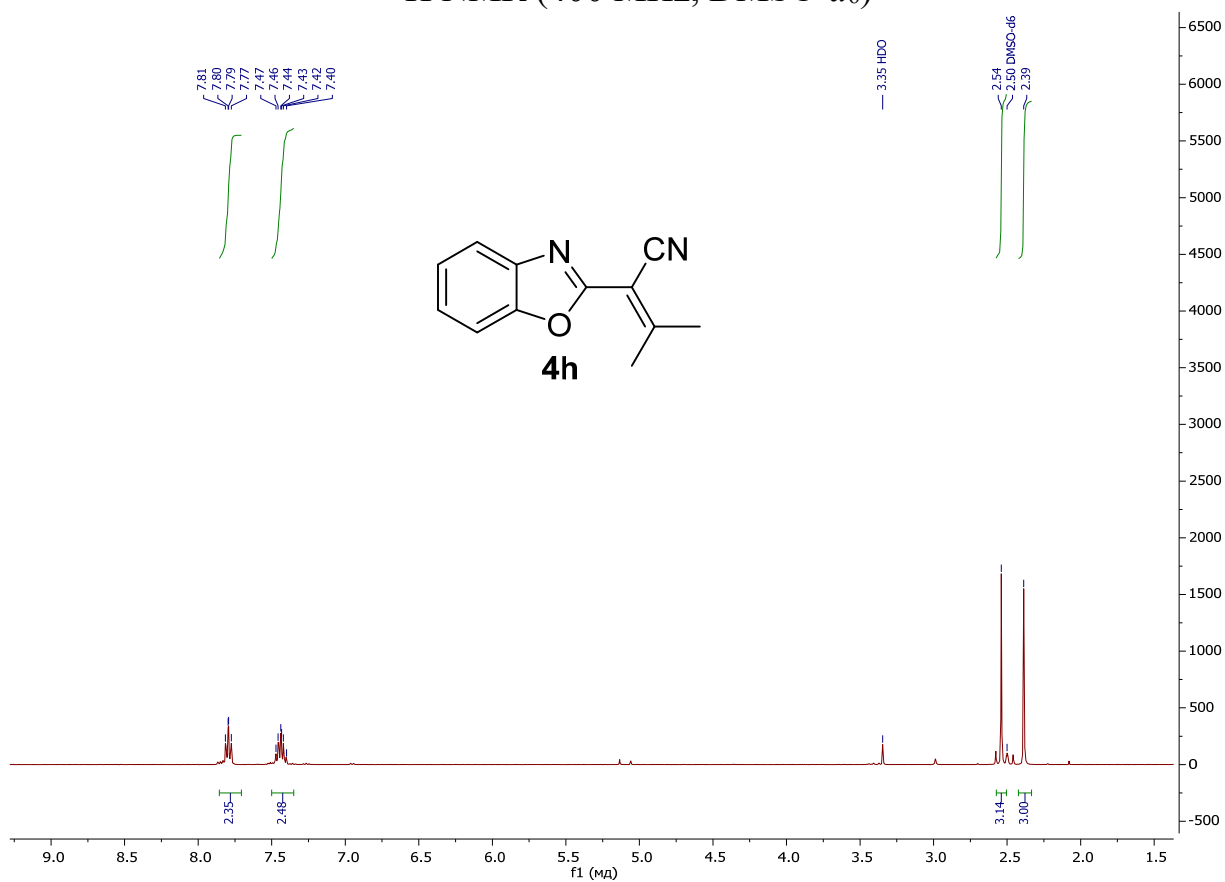

$^{13}\text{C}$  NMR (151 MHz,  $\text{DMSO-}d_6$ )

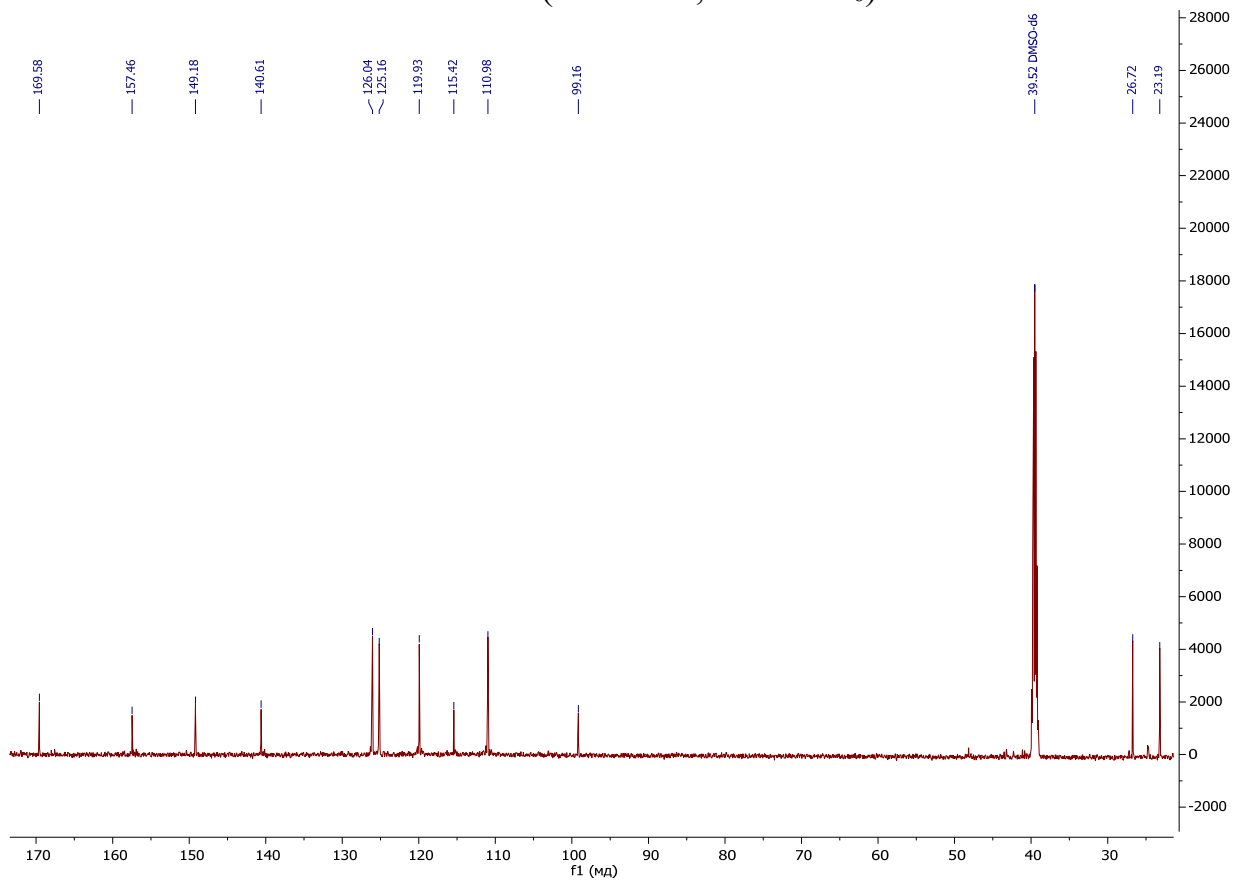

(*E*)-2-(4-phenylthiazol-2-yl)-2-(1,4,5-trimethyl-1,3-dihydro-2H-imidazol-2-ylidene)acetonitrile (**5a**)

$^1\text{H}$  NMR (300 MHz,  $\text{DMSO-}d_6$ )

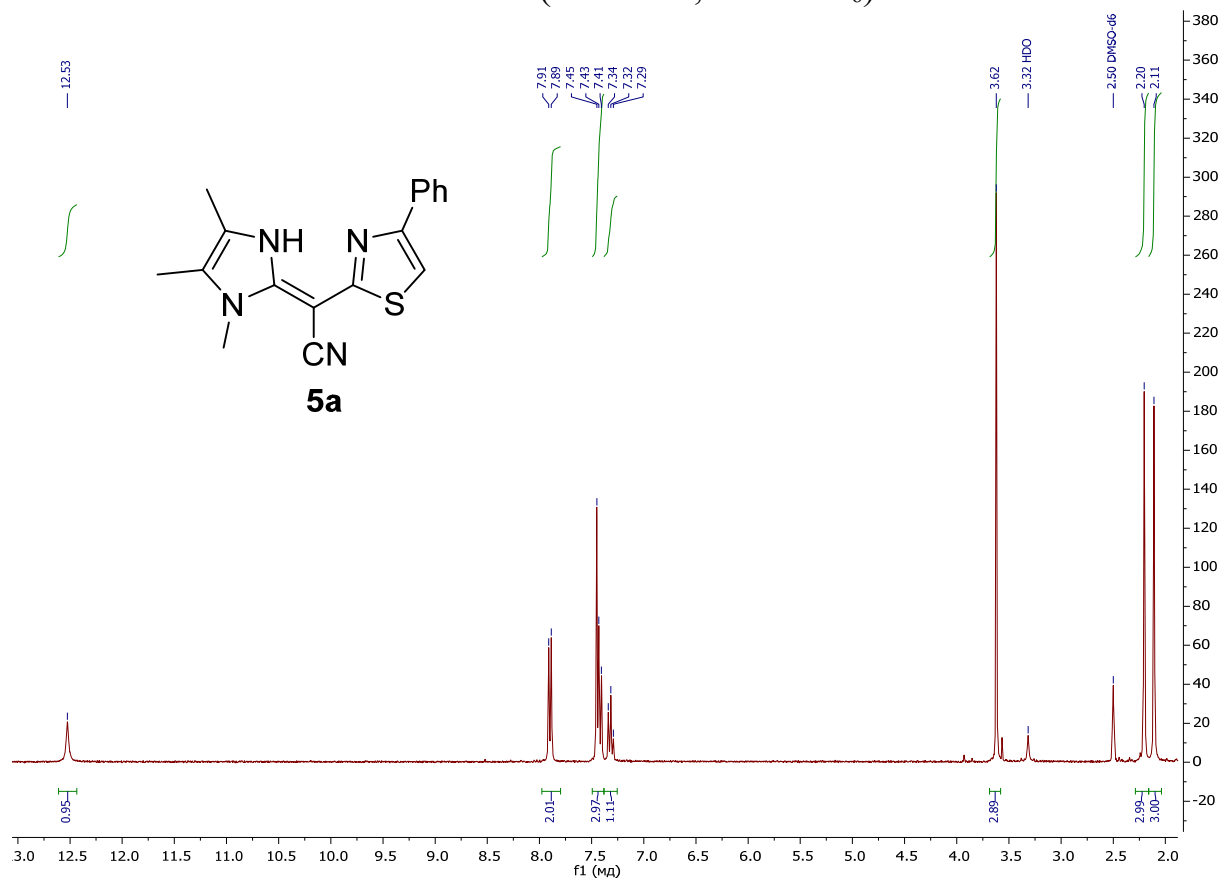

$^{13}\text{C}$  NMR (75 MHz,  $\text{DMSO-}d_6$ )

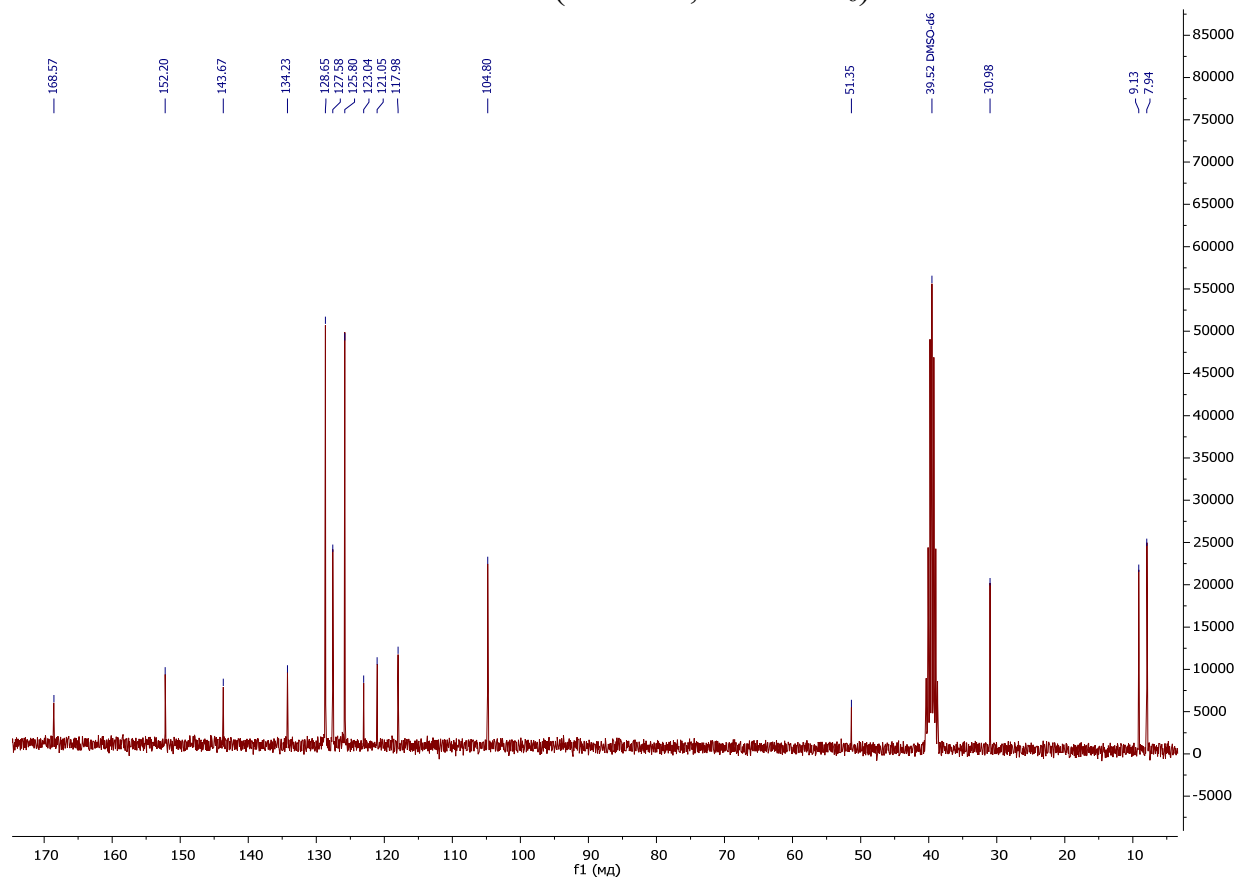

(*E*)-2-(1-isopropyl-4,5-dimethyl-1,3-dihydro-2H-imidazol-2-ylidene)-2-(4-phenylthiazol-2-yl)acetonitrile (**5b**)

$^1\text{H}$  NMR (300 MHz,  $\text{DMSO-}d_6$ )

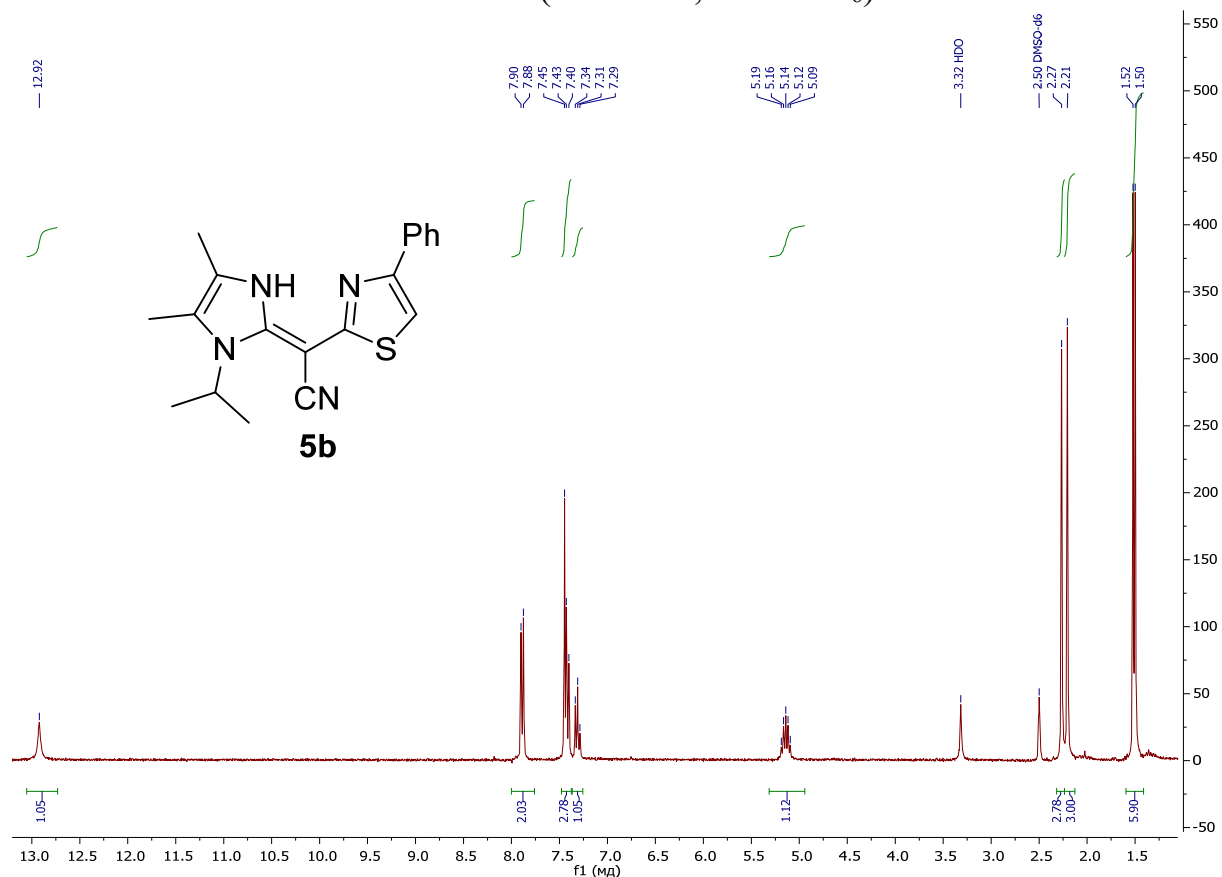

$^{13}\text{C}$  NMR (101 MHz,  $\text{DMSO-}d_6$ )

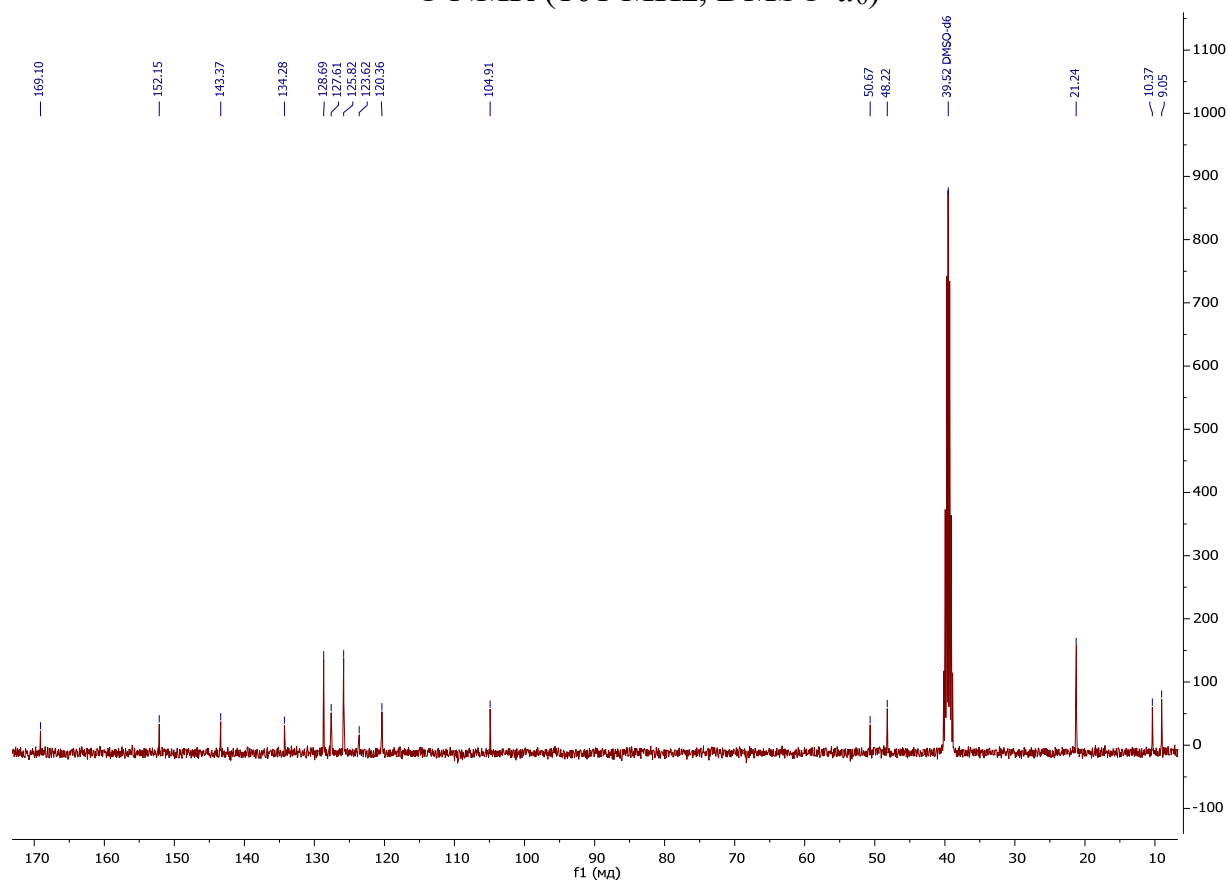

(*E*)-2-(1-(2,2-dimethoxyethyl)-4,5-dimethyl-1,3-dihydro-2H-imidazol-2-ylidene)-2-(4-phenylthiazol-2-yl)acetonitrile (**5c**)

$^1\text{H}$  NMR (400 MHz,  $\text{DMSO-}d_6$ )

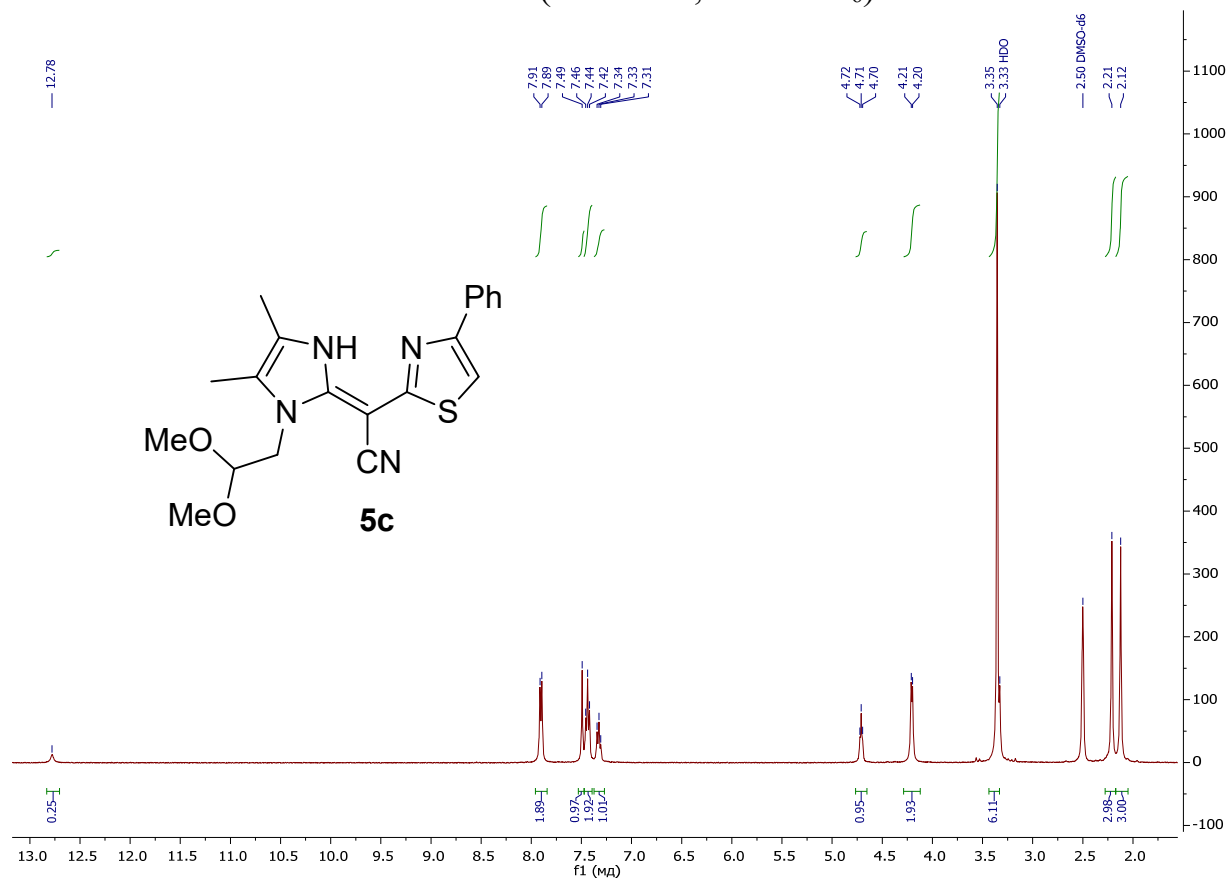

$^{13}\text{C}$  NMR (75 MHz,  $\text{DMSO-}d_6$ )

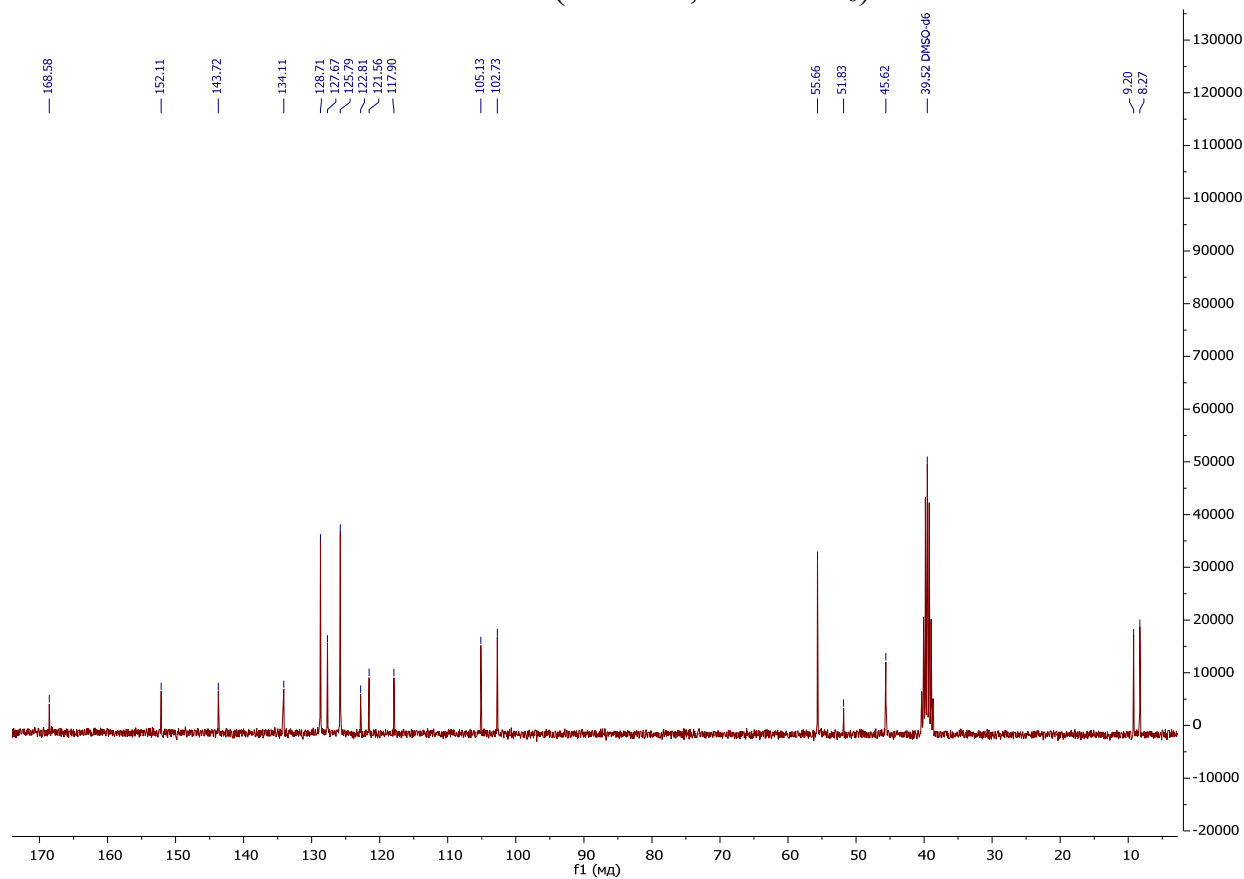

(*E*)-2-(1-benzyl-4,5-dimethyl-1,3-dihydro-2H-imidazol-2-ylidene)-2-(4-phenylthiazol-2-yl)acetonitrile (**5d**)

$^1\text{H}$  NMR (300 MHz,  $\text{DMSO-}d_6$ )

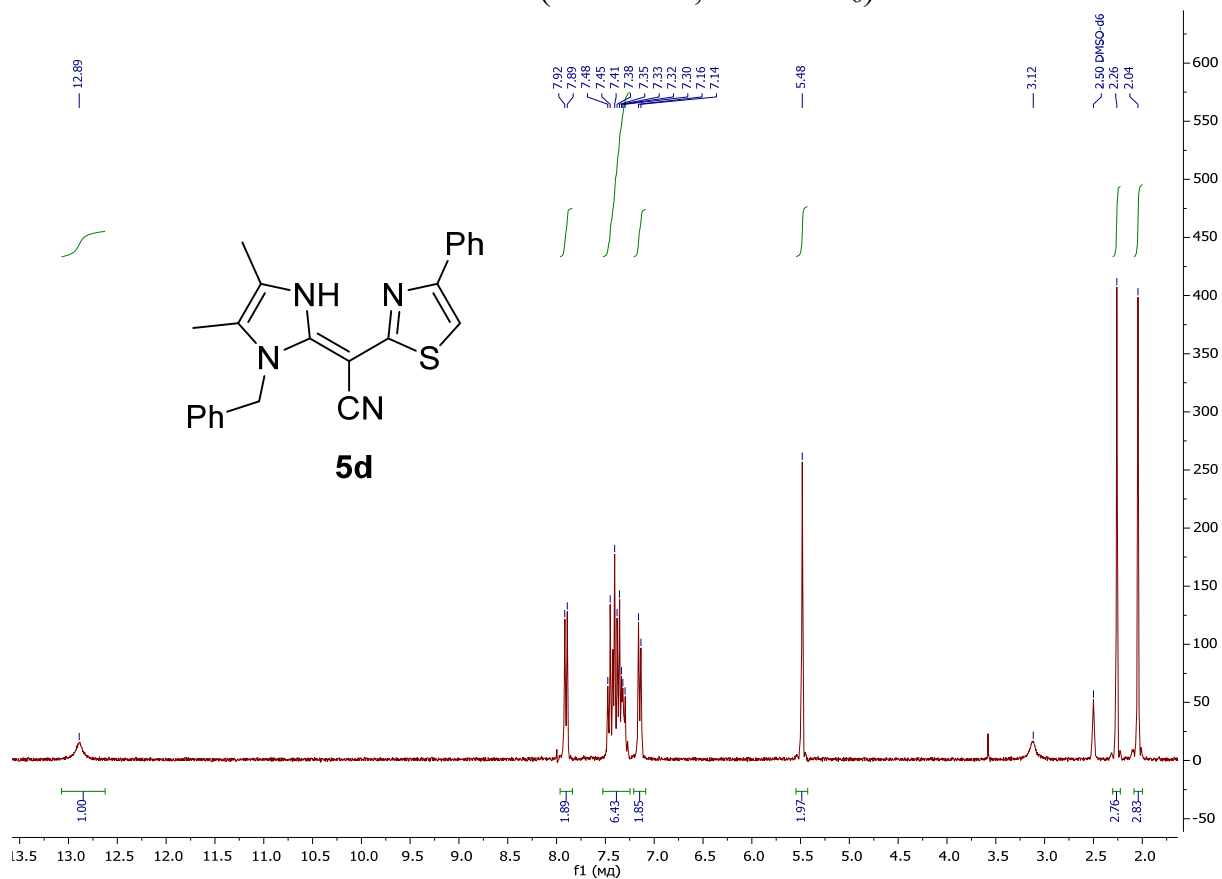

$^{13}\text{C}$  NMR (126 MHz,  $\text{DMSO-}d_6$ )

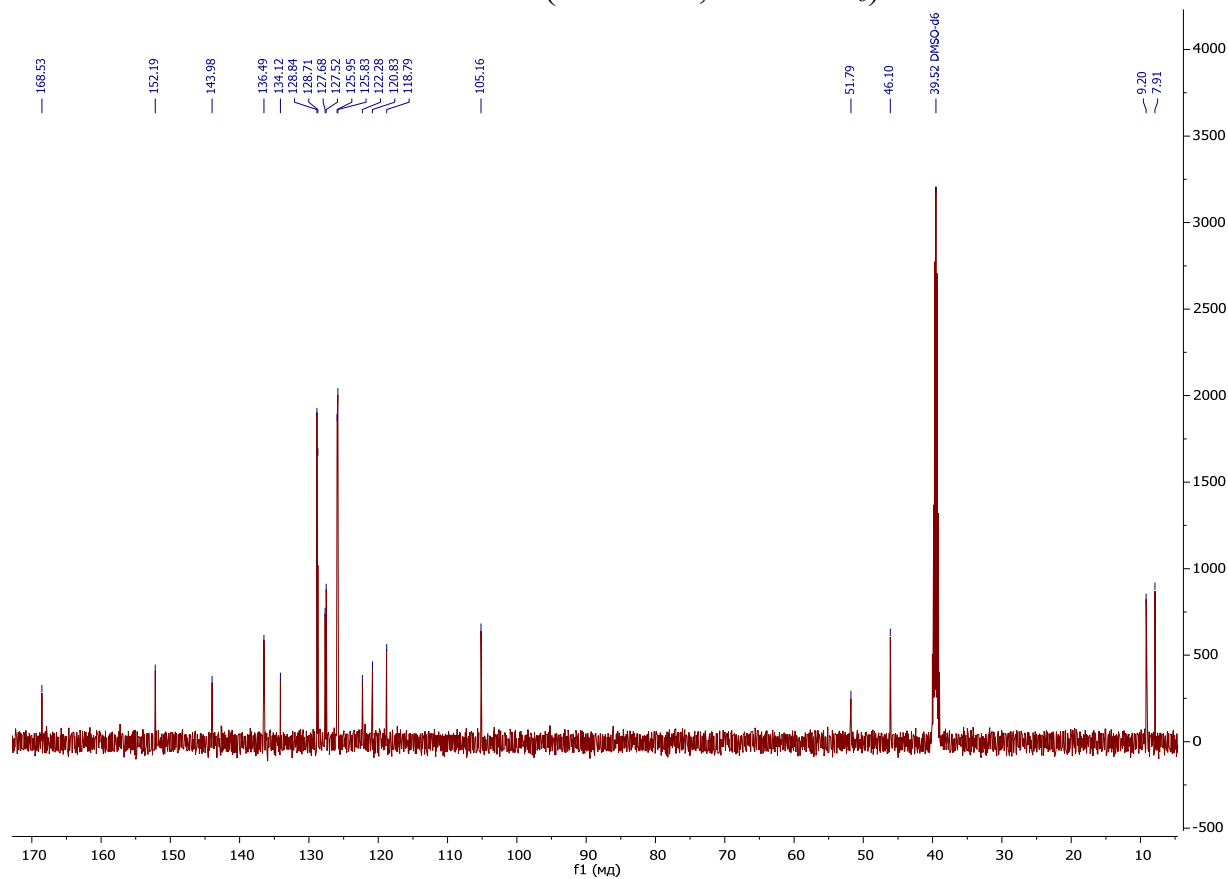

(*E*)-2-(1-(furan-2-ylmethyl)-4,5-dimethyl-1,3-dihydro-2H-imidazol-2-ylidene)-2-(4-phenylthiazol-2-yl)acetonitrile (**5e**)

$^1\text{H}$  NMR (300 MHz,  $\text{DMSO-}d_6$ )

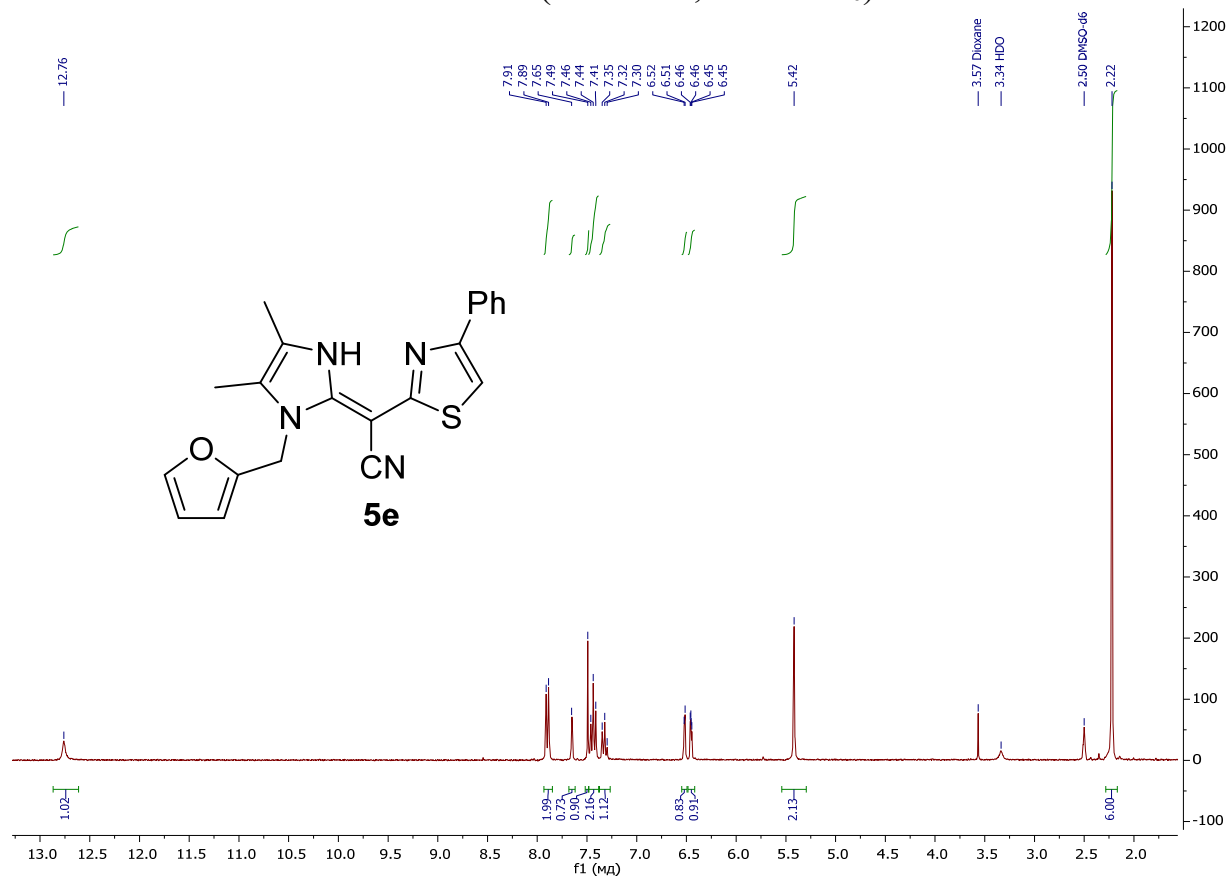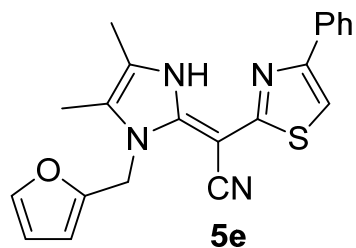

$^{13}\text{C}$  NMR (126 MHz,  $\text{DMSO-}d_6$ )

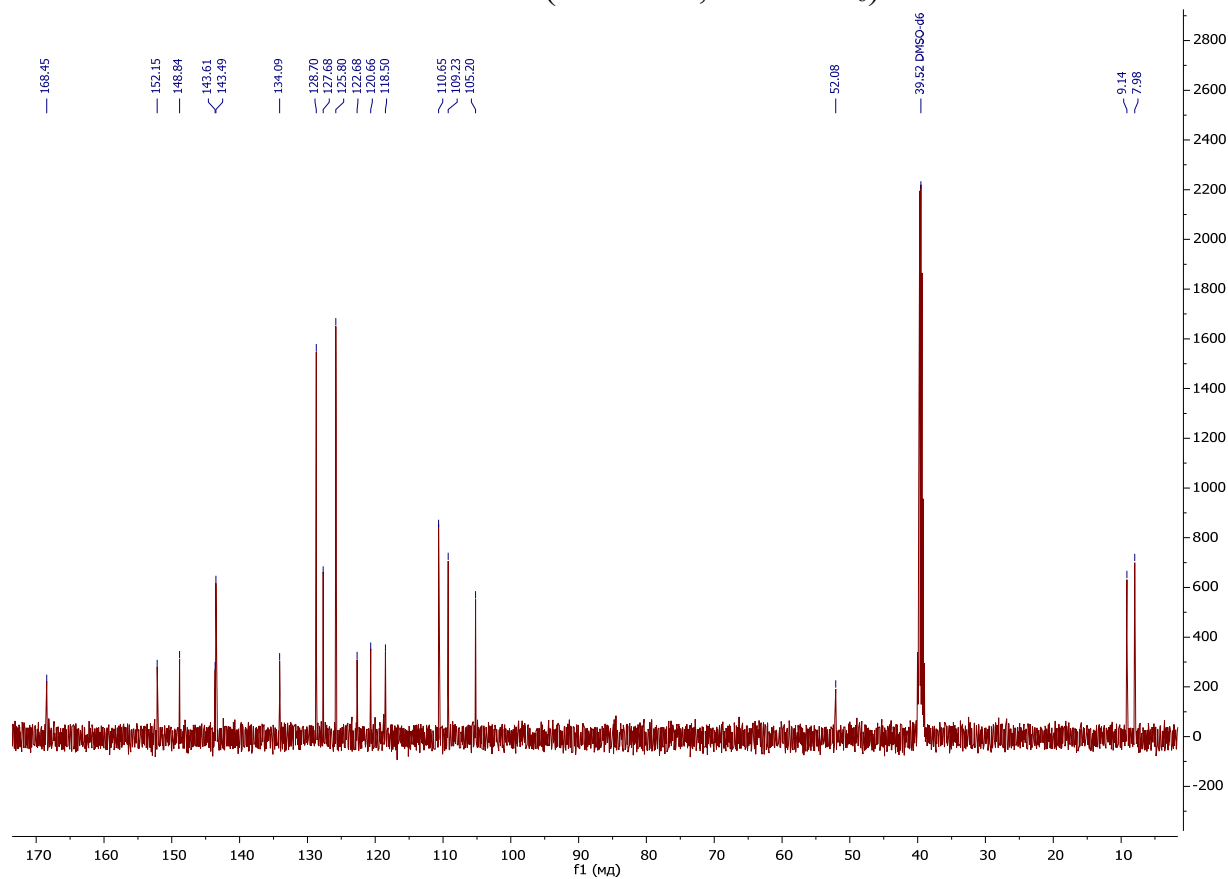

(*E*)-2-(4-(naphthalen-2-yl)thiazol-2-yl)-2-(1,4,5-trimethyl-1,3-dihydro-2H-imidazol-2-ylidene)acetonitrile (**5f**)

$^1\text{H}$  NMR (600 MHz,  $\text{DMSO-}d_6$ )

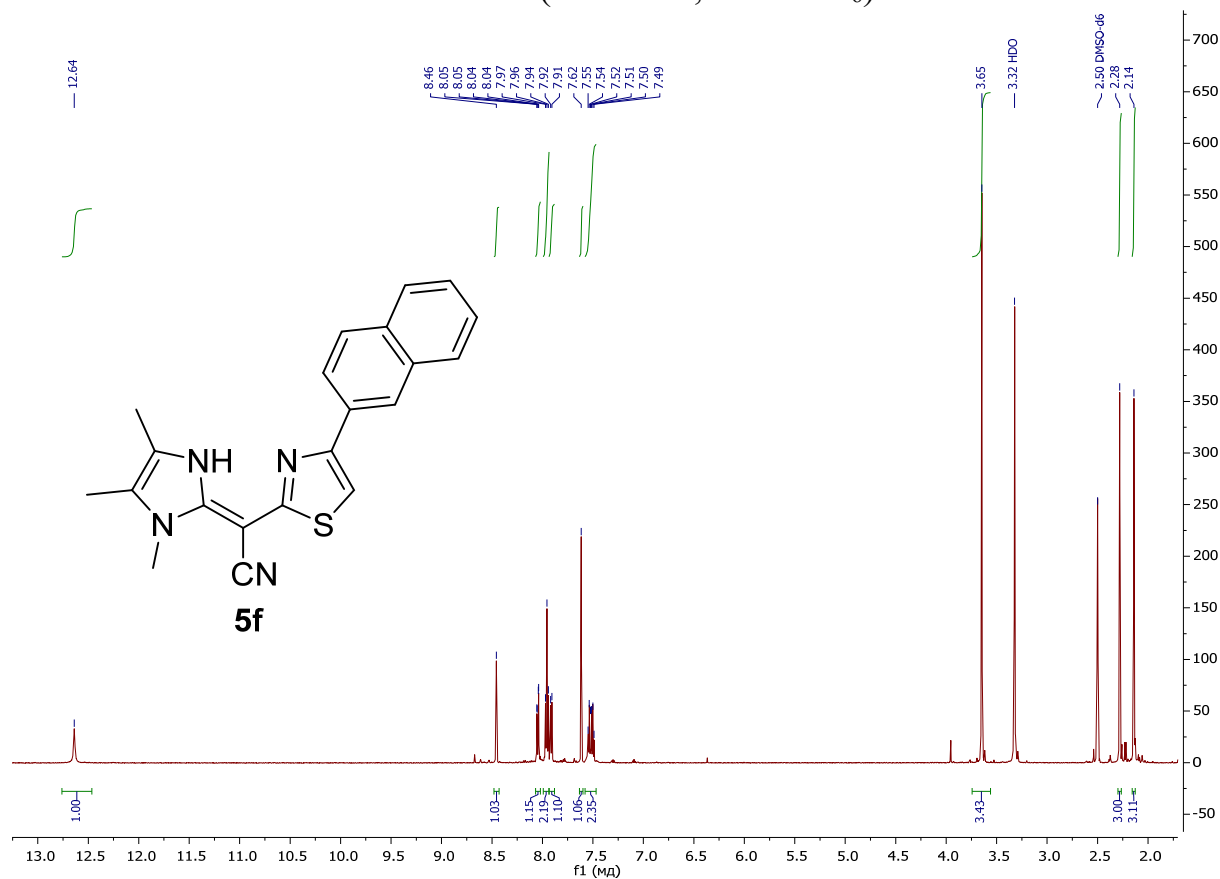

$^{13}\text{C}$  NMR (151 MHz,  $\text{DMSO-}d_6$ )

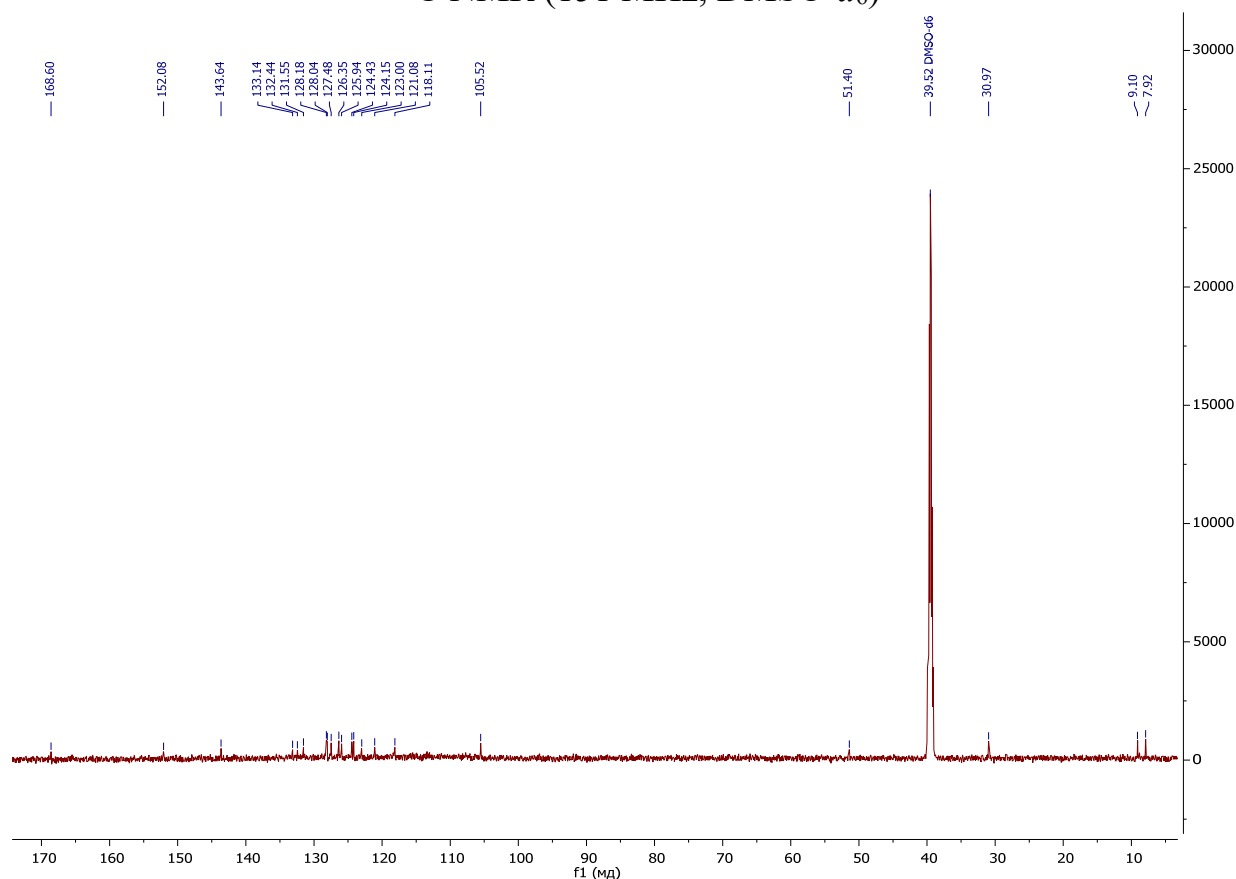



(*E*)-2-(1-benzyl-4,5-dimethyl-1,3-dihydro-2H-imidazol-2-ylidene)-2-(4-(naphthalen-2-yl)thiazol-2-yl)acetonitrile (**5g**)

$^1\text{H}$  NMR (500 MHz,  $\text{DMSO-}d_6$ )

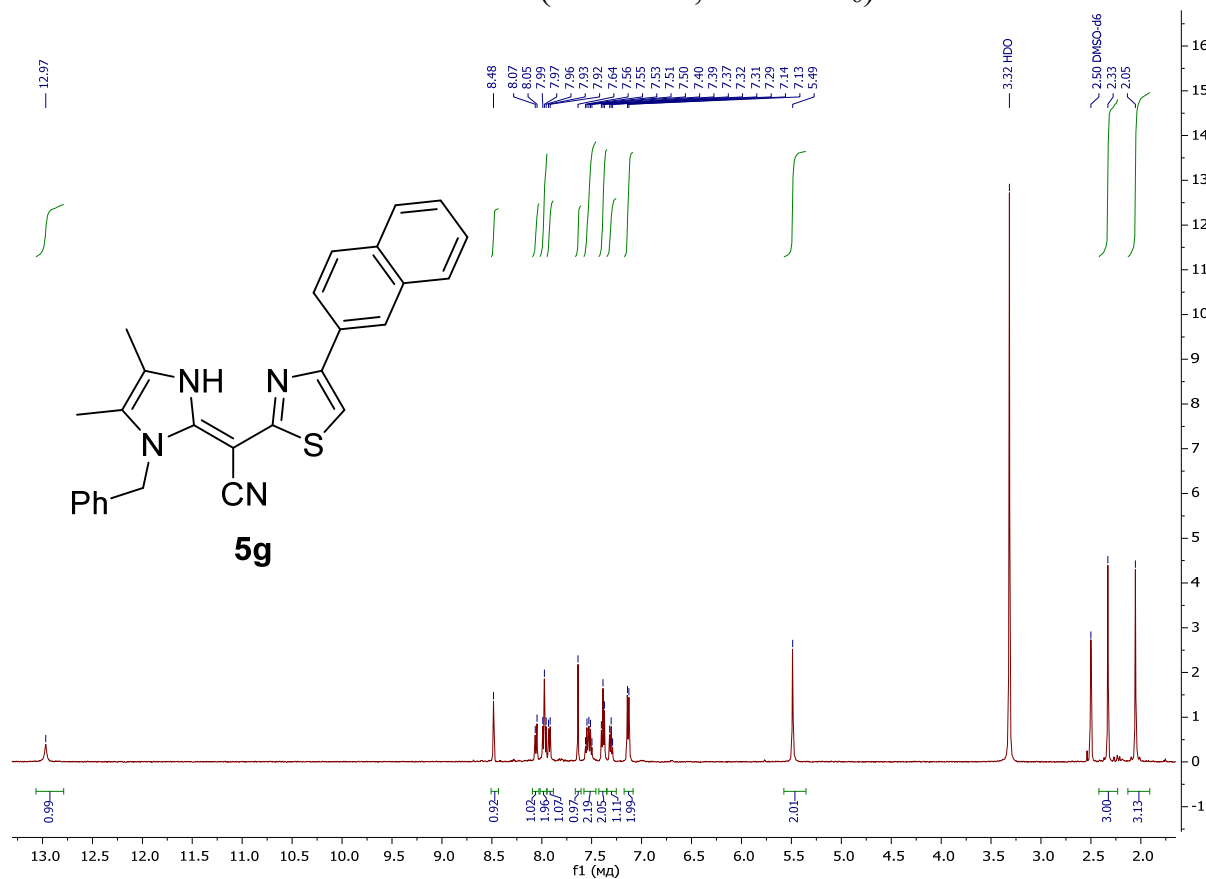

$^{13}\text{C}$  NMR (126 MHz,  $\text{DMSO-}d_6$ )

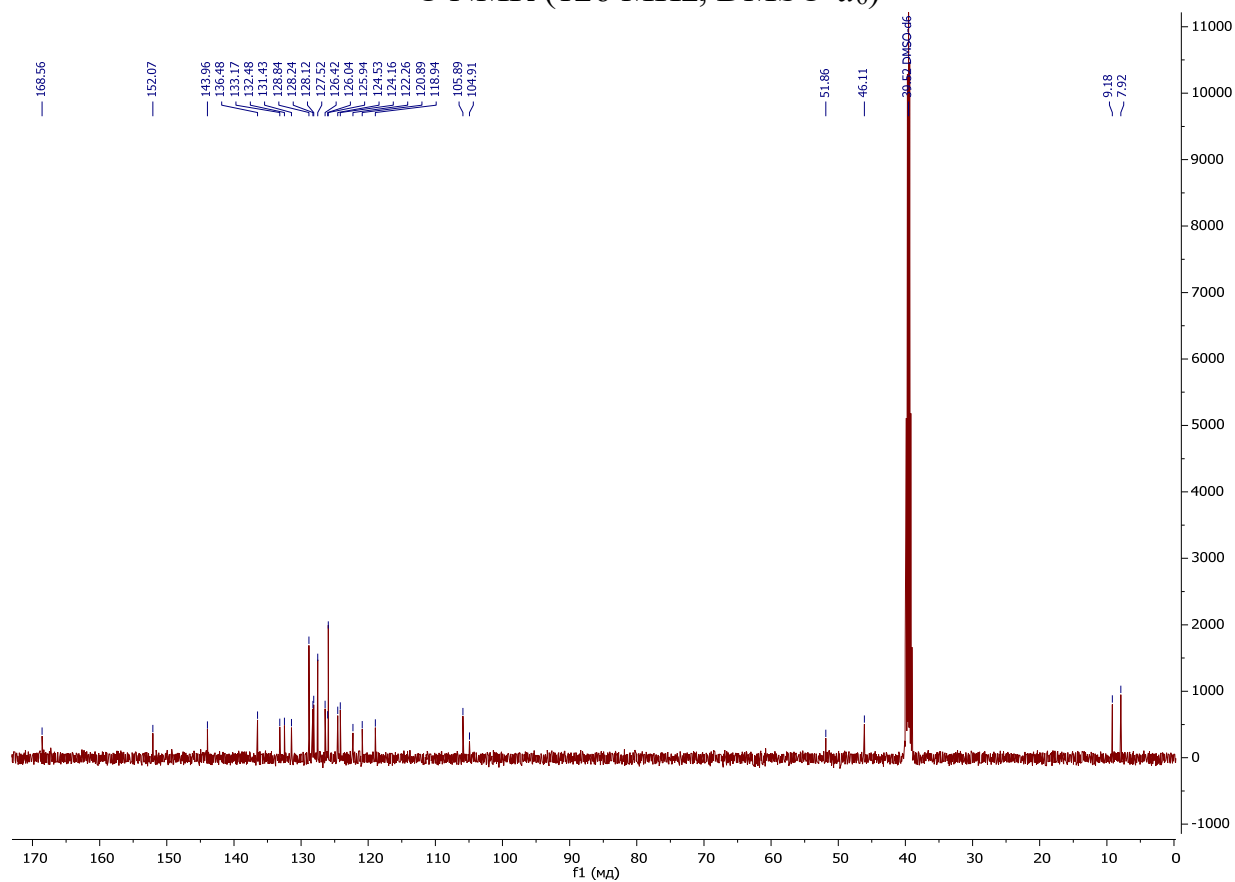

(*E*)-2-(4-(3-nitrophenyl)thiazol-2-yl)-2-(1,4,5-trimethyl-1,3-dihydro-2H-imidazol-2-ylidene)acetonitrile (**5h**)

$^1\text{H NMR}$  (500 MHz,  $\text{DMSO-}d_6$ )

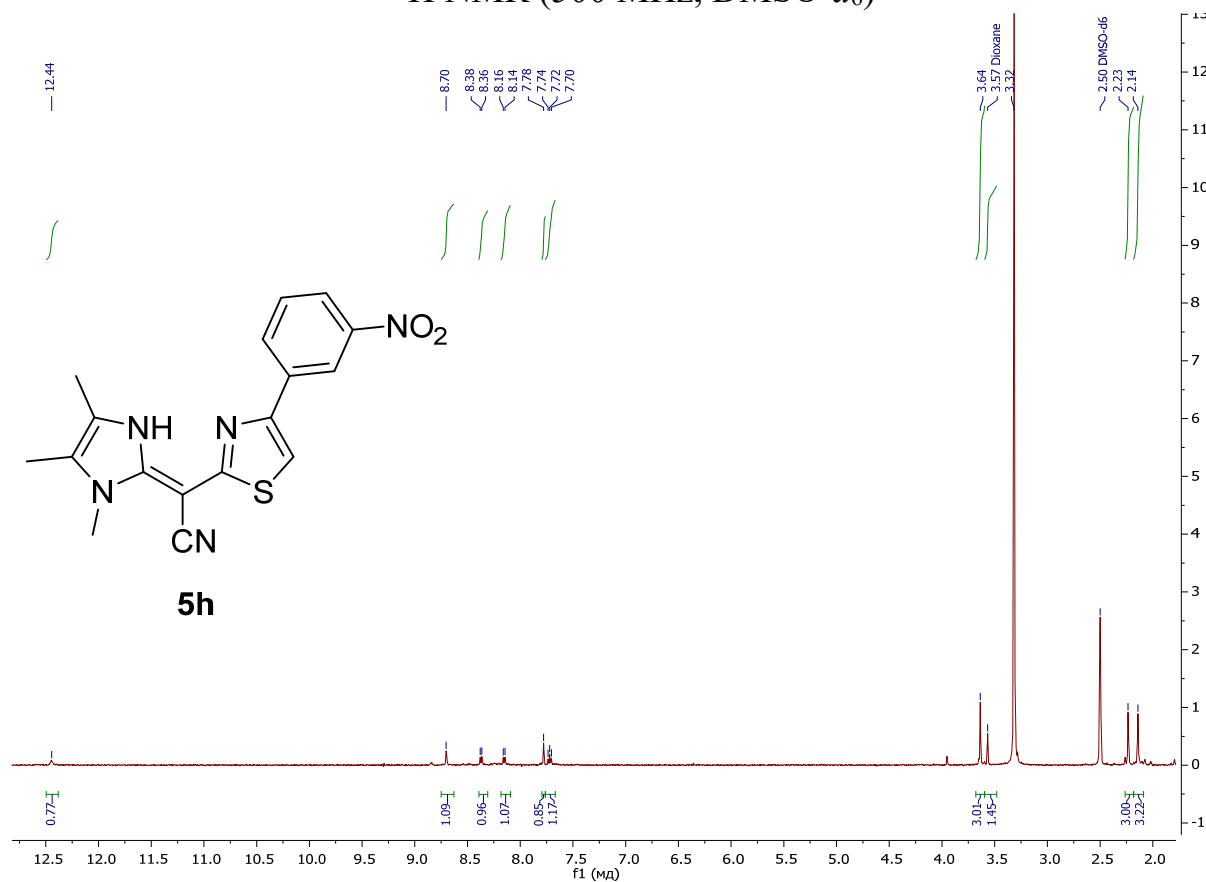

(*E*)-2-(1-benzyl-4,5-dimethyl-1,3-dihydro-2H-imidazol-2-ylidene)-2-(4-(3-nitrophenyl)thiazol-2-yl)acetonitrile (**5i**)

$^1\text{H}$  NMR (300 MHz,  $\text{DMSO-}d_6$ )

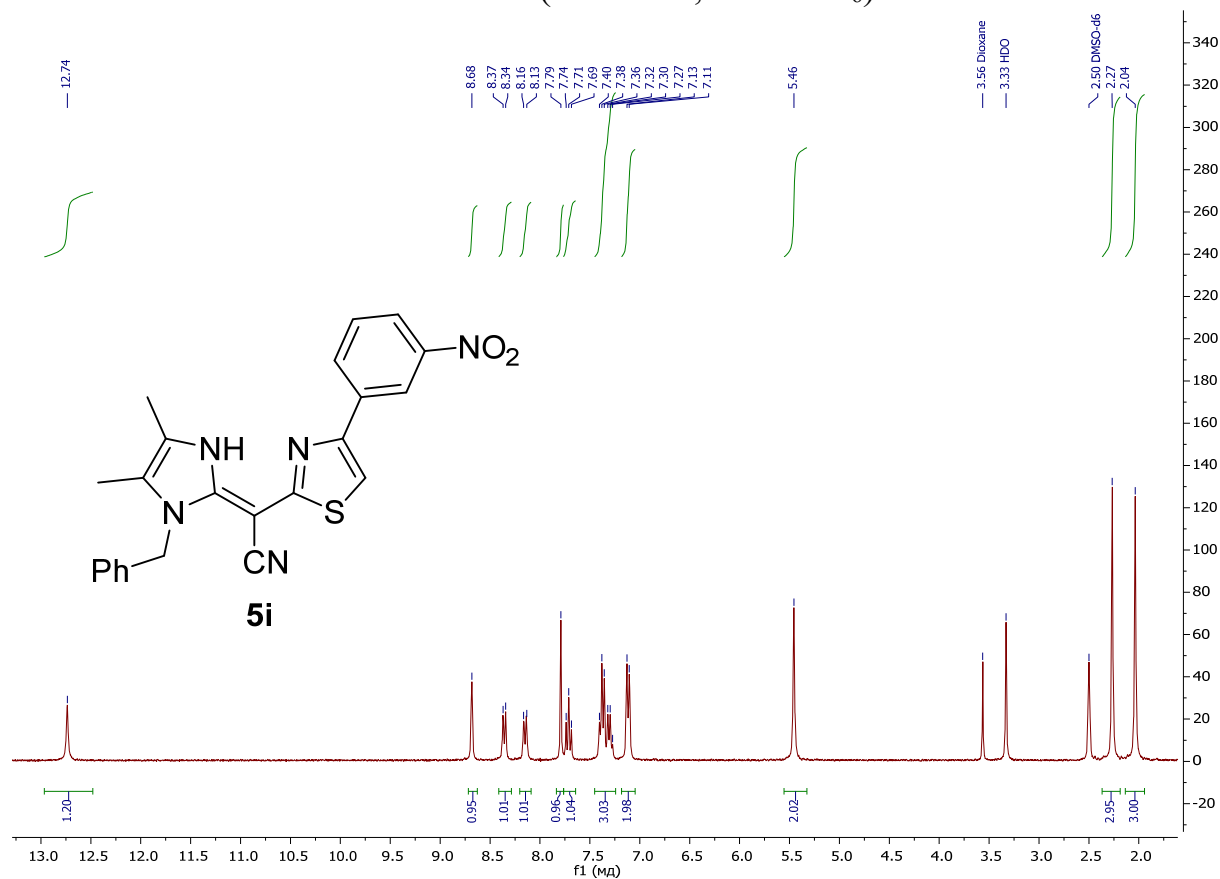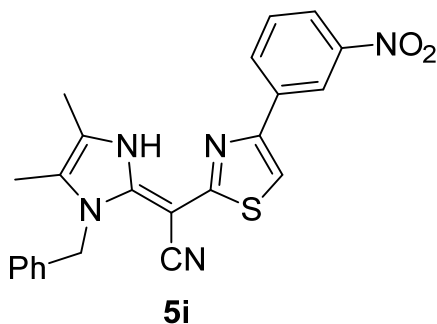

$^{13}\text{C}$  NMR (75 MHz,  $\text{DMSO-}d_6$ )

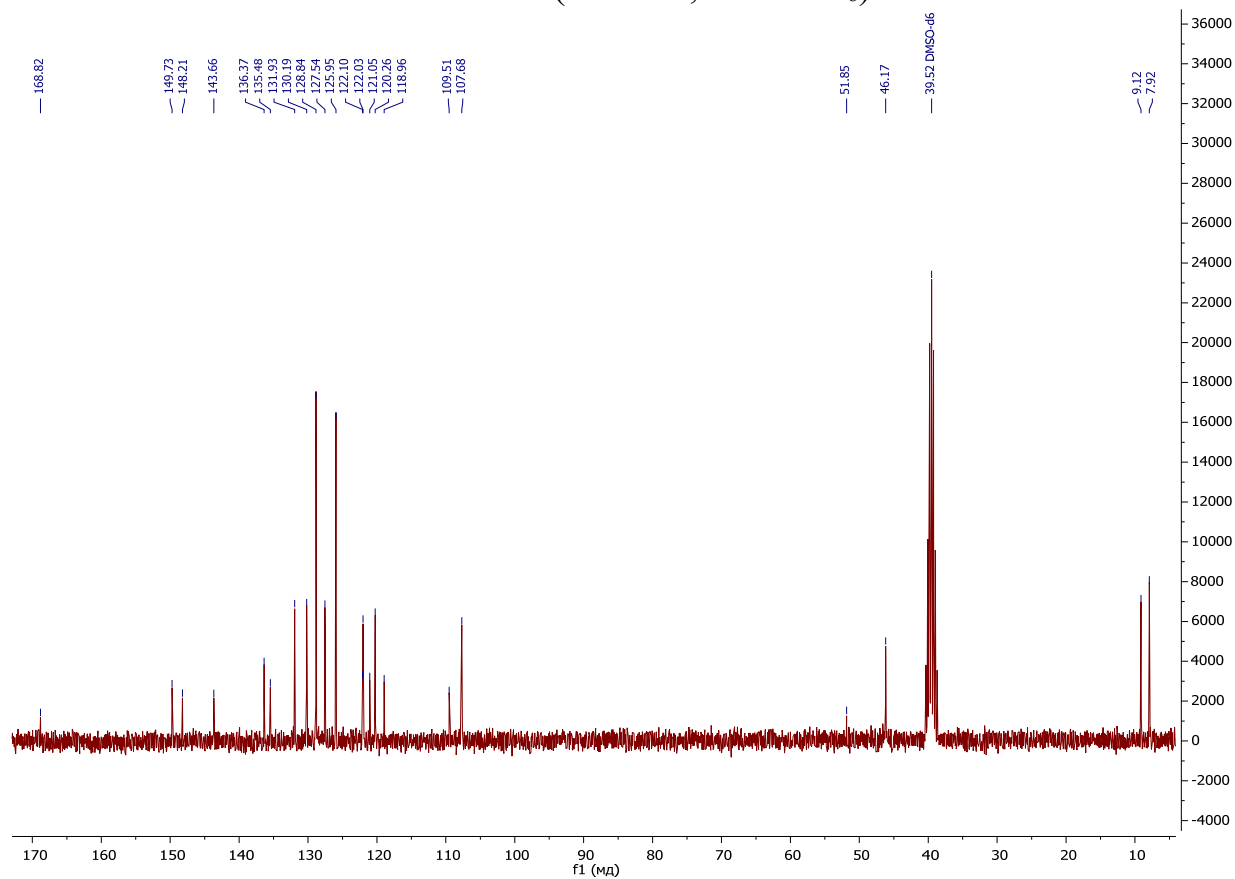

(*E*)-2-(5-methyl-4-phenylthiazol-2-yl)-2-(1,4,5-trimethyl-1,3-dihydro-2H-imidazol-2-ylidene)acetonitrile (**5j**)

$^1\text{H}$  NMR (300 MHz,  $\text{DMSO-}d_6$ )

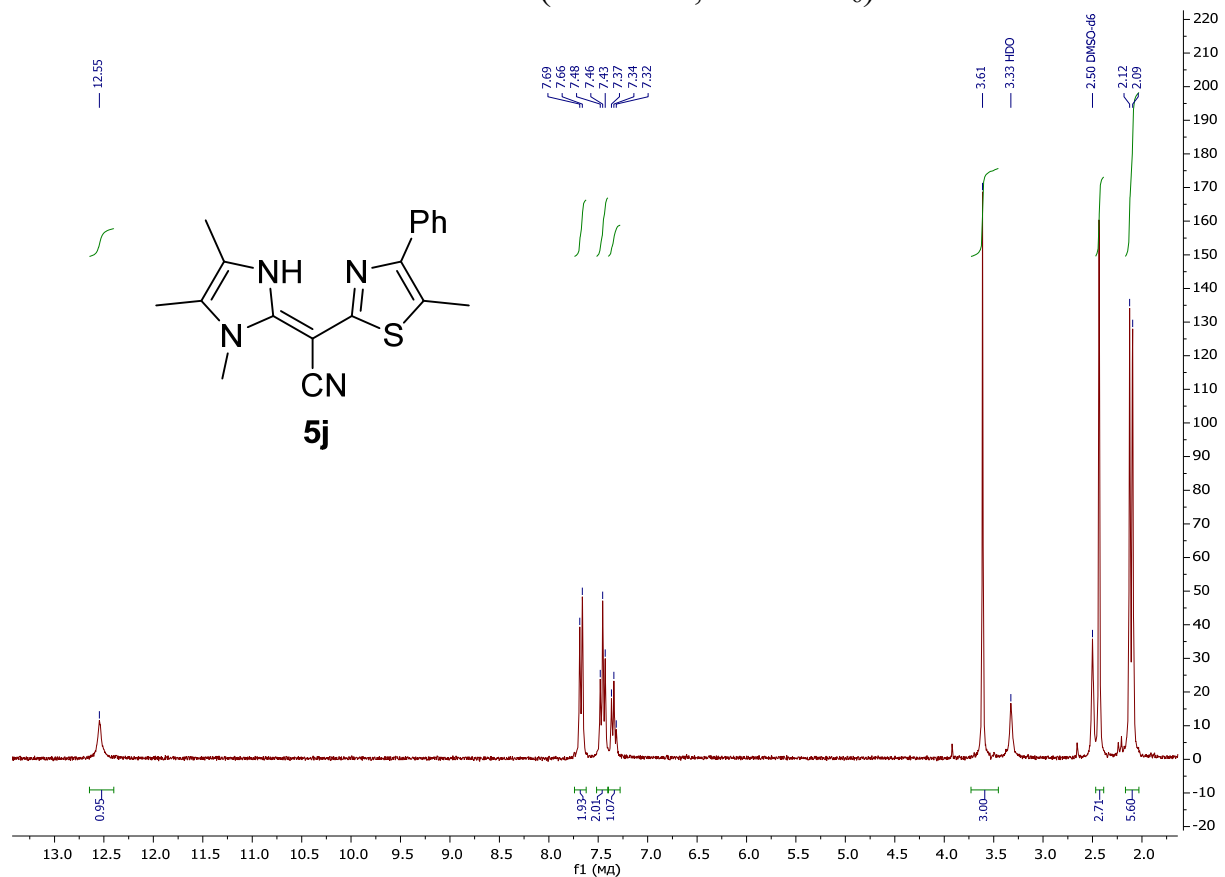

$^{13}\text{C}$  NMR (101 MHz,  $\text{DMSO-}d_6$ )

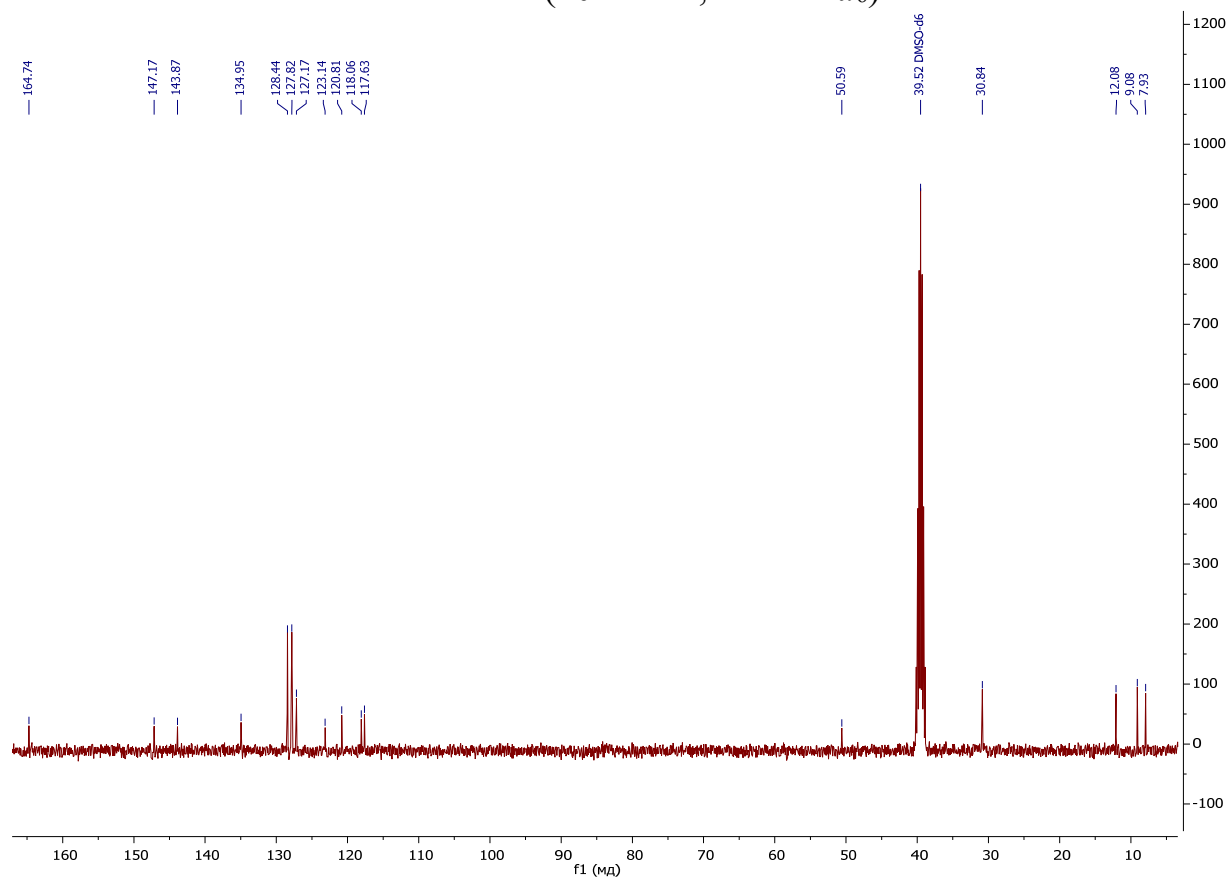

(*E*)-2-(1-isopropyl-4,5-dimethyl-1,3-dihydro-2H-imidazol-2-ylidene)-2-(5-methyl-4-phenylthiazol-2-yl)acetonitrile (**5k**)

$^1\text{H}$  NMR (600 MHz,  $\text{DMSO-}d_6$ )

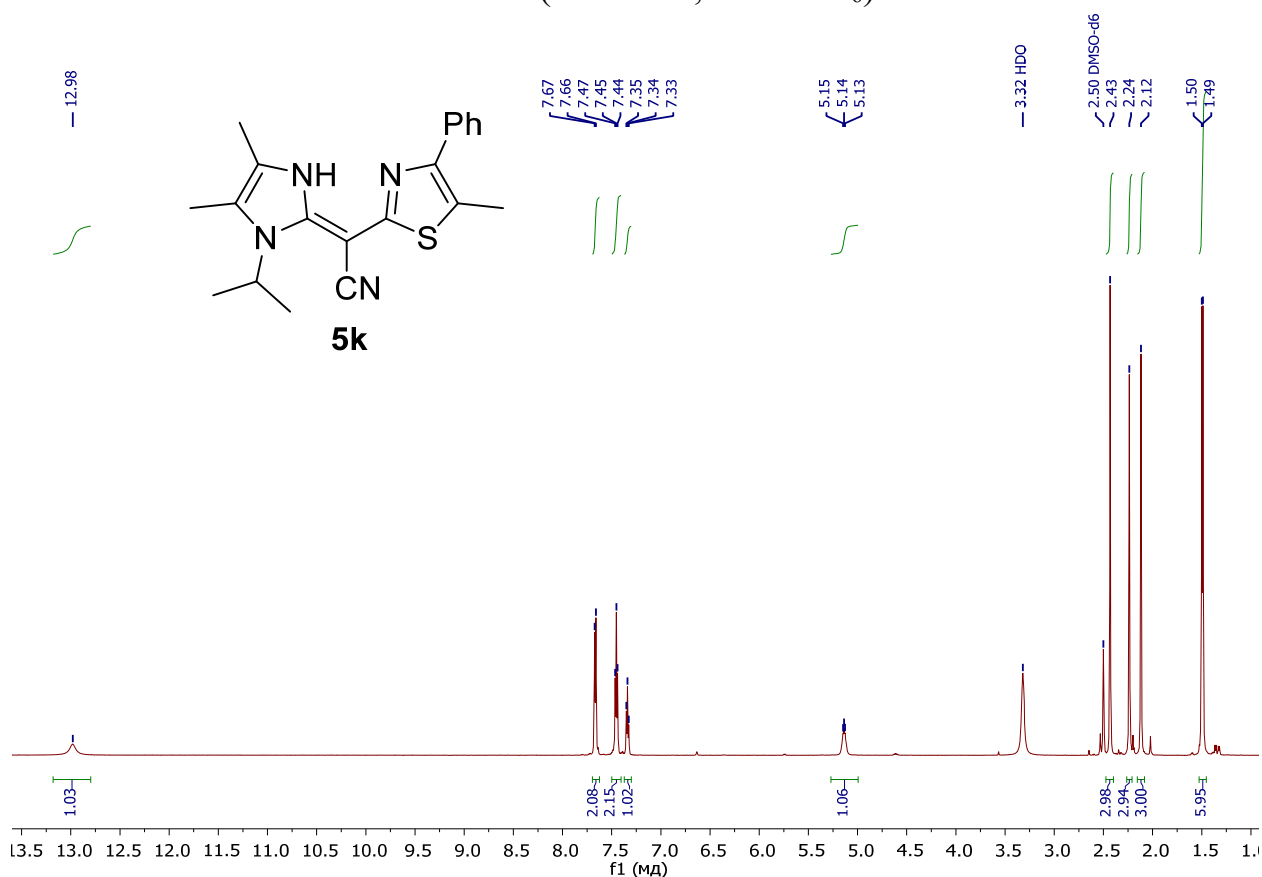

$^{13}\text{C}$  NMR (151 MHz,  $\text{DMSO-}d_6$ )

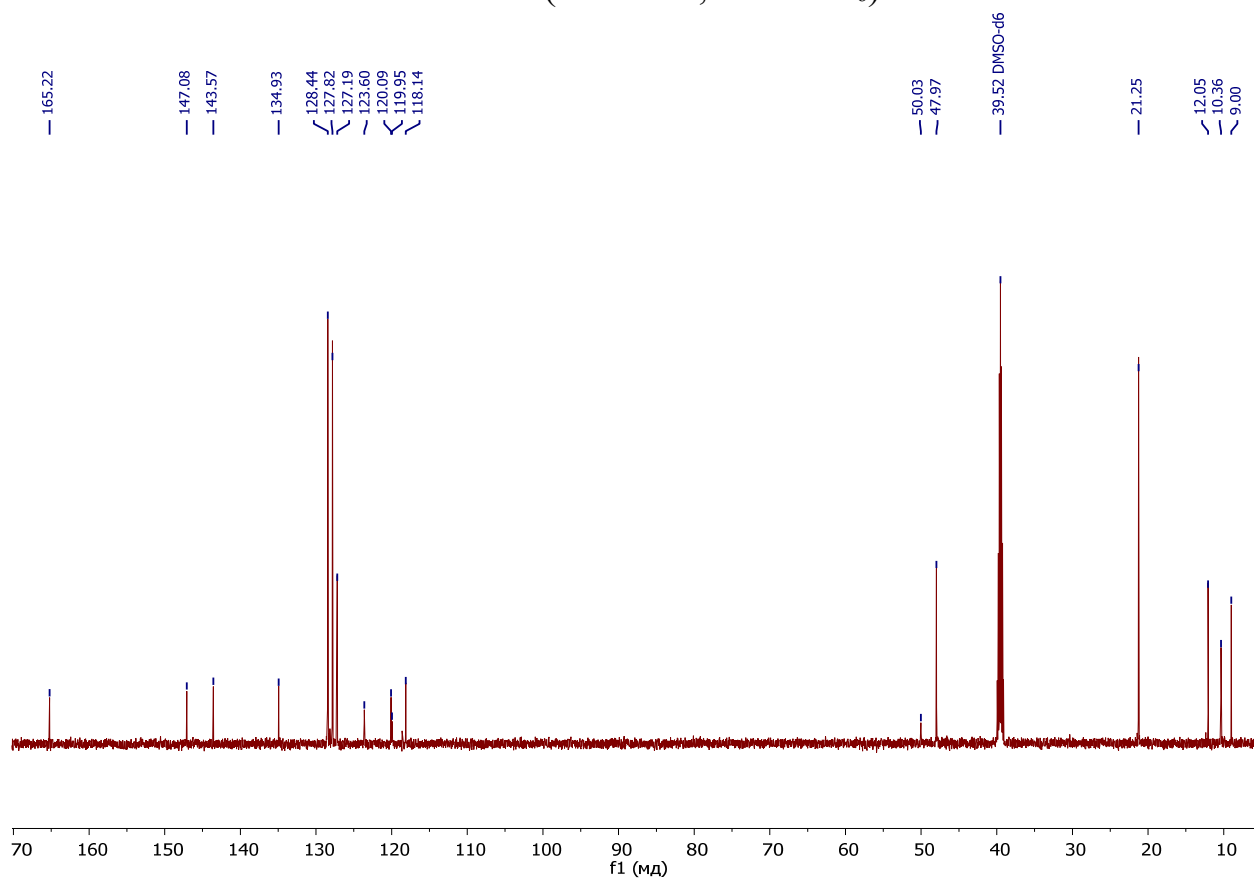

(*E*)-2-(1-(2,2-dimethoxyethyl)-4,5-dimethyl-1,3-dihydro-2H-imidazol-2-ylidene)-2-(5-methyl-4-phenylthiazol-2-yl)acetonitrile (**5I**)

$^1\text{H}$  NMR (500 MHz,  $\text{DMSO-}d_6$ )

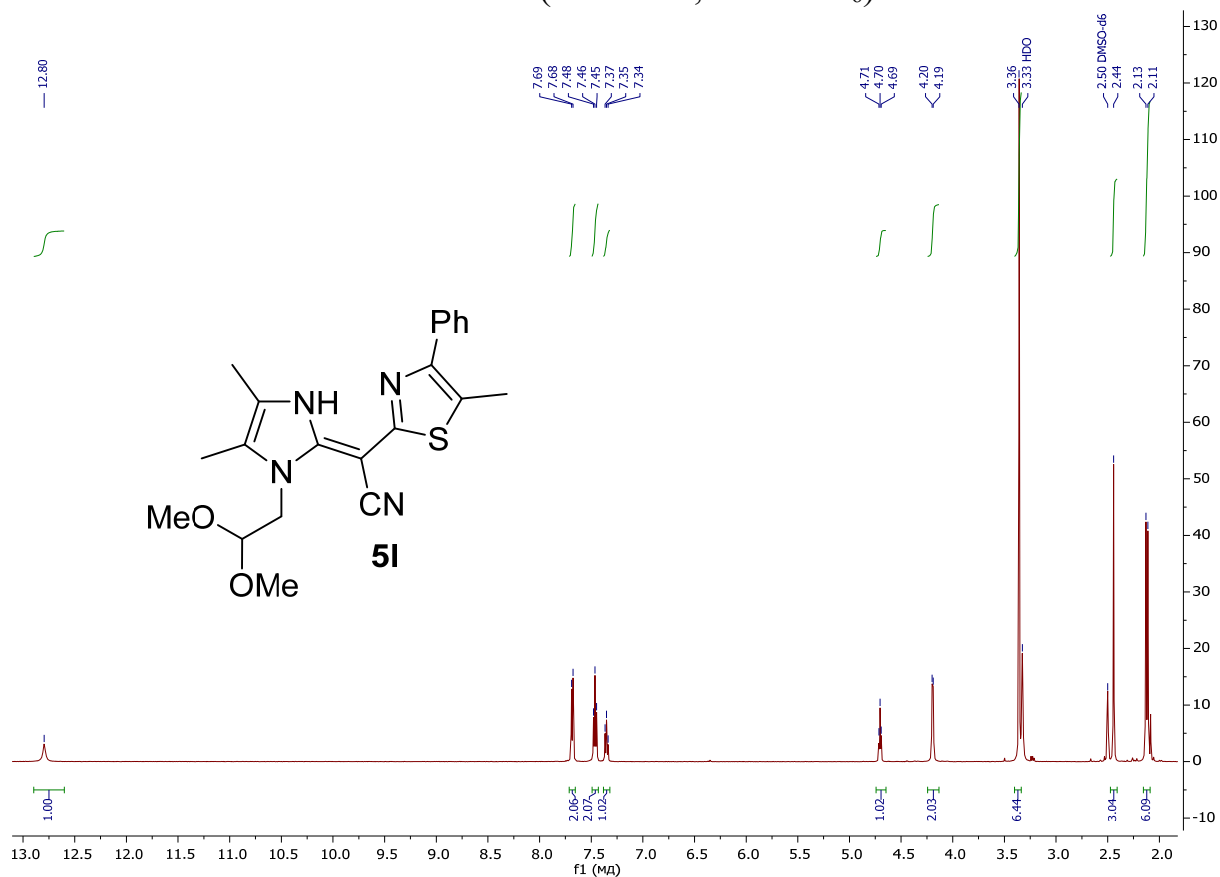

$^{13}\text{C}$  NMR (101 MHz,  $\text{DMSO-}d_6$ )

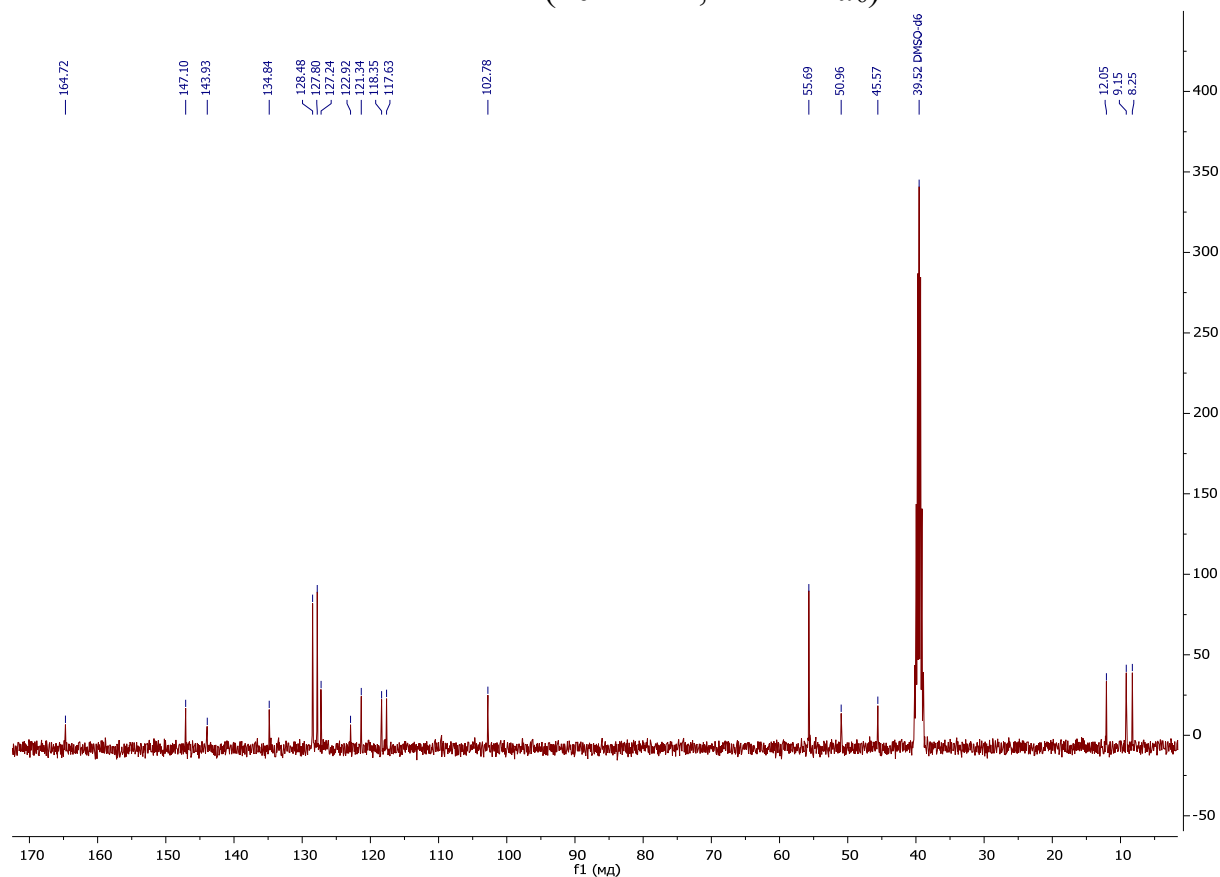

(*E*)-2-(1-benzyl-4,5-dimethyl-1,3-dihydro-2H-imidazol-2-ylidene)-2-(5-methyl-4-phenylthiazol-2-yl)acetonitrile (**5m**)

$^1\text{H}$  NMR (300 MHz,  $\text{DMSO-}d_6$ )

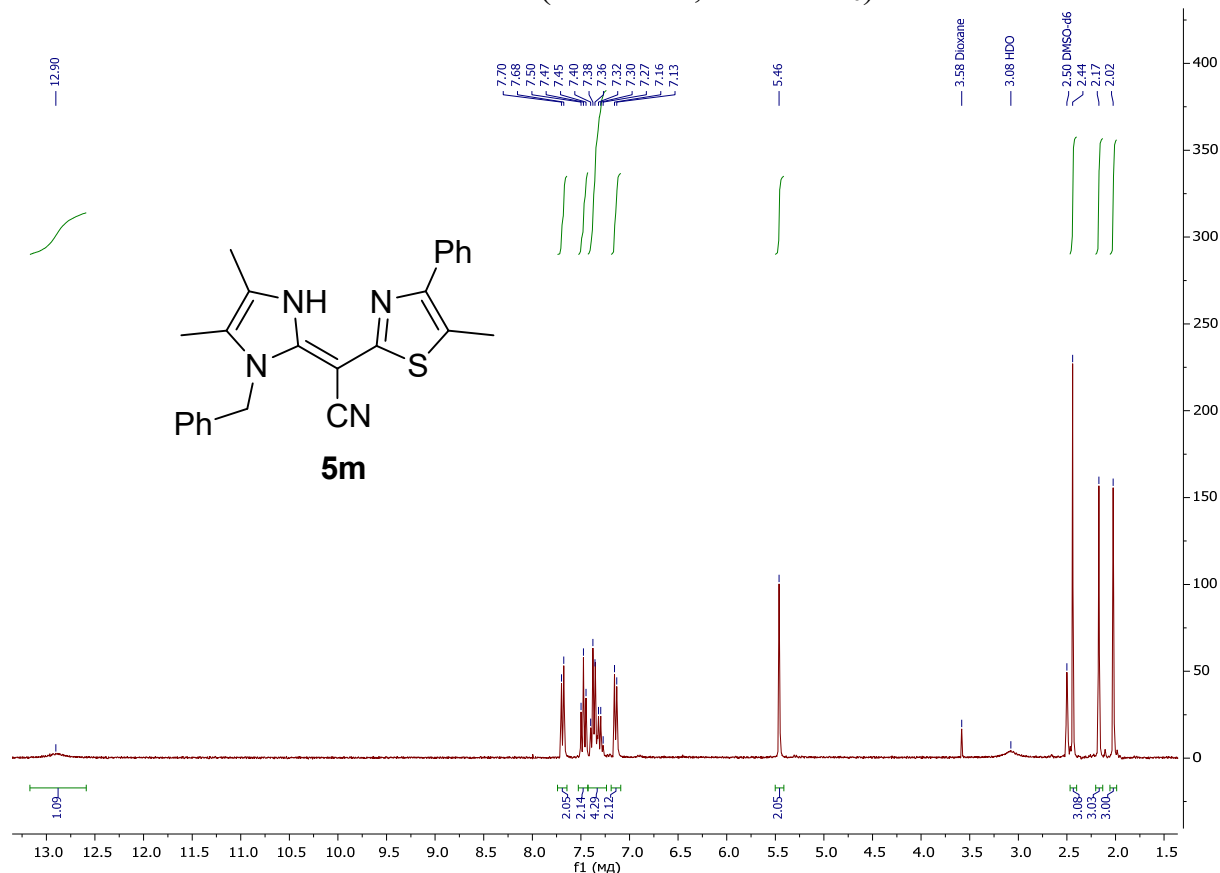

$^{13}\text{C}$  NMR (126 MHz,  $\text{DMSO-}d_6$ )

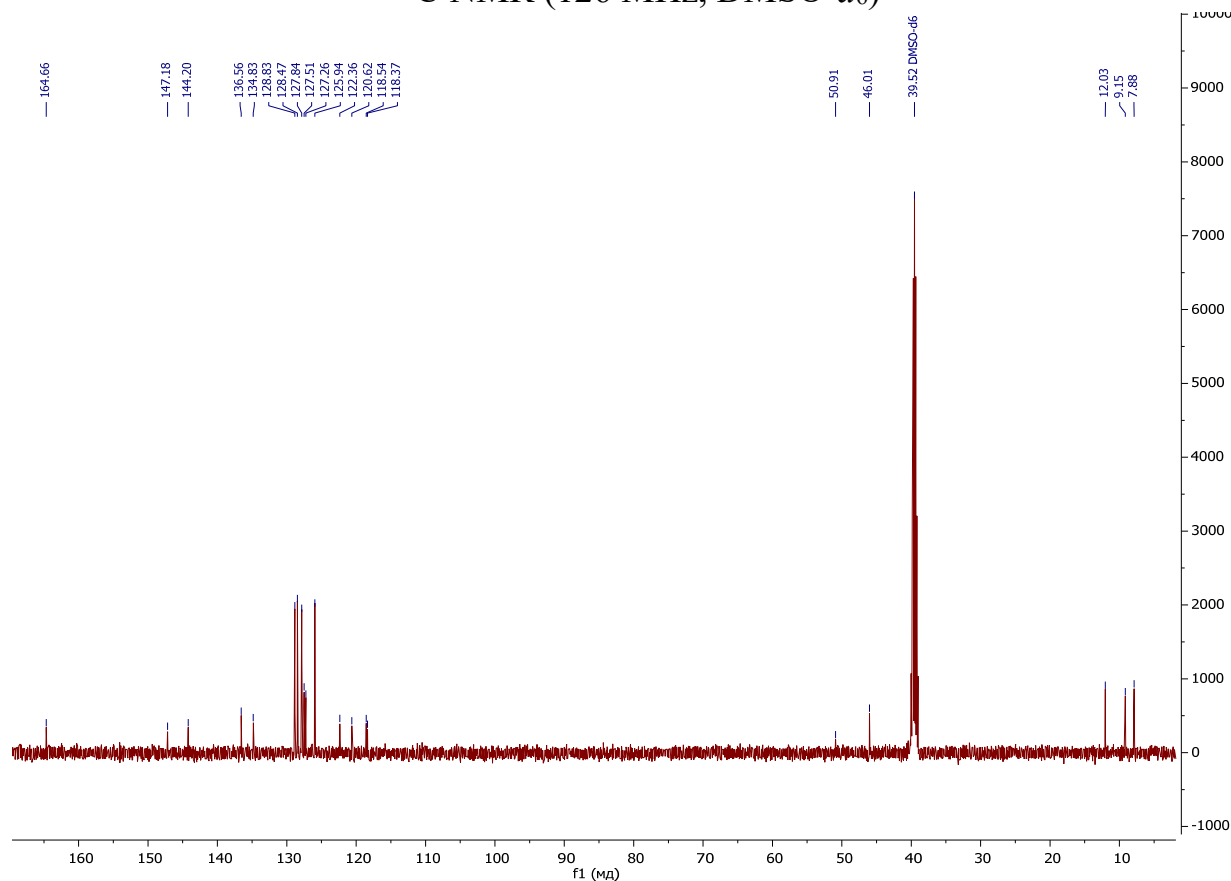

(*E*)-2-(4,5-dimethyl-1-phenethyl-1,3-dihydro-2H-imidazol-2-ylidene)-2-(5-methyl-4-phenylthiazol-2-yl)acetonitrile (**5n**)

$^1\text{H}$  NMR (300 MHz,  $\text{DMSO-}d_6$ )

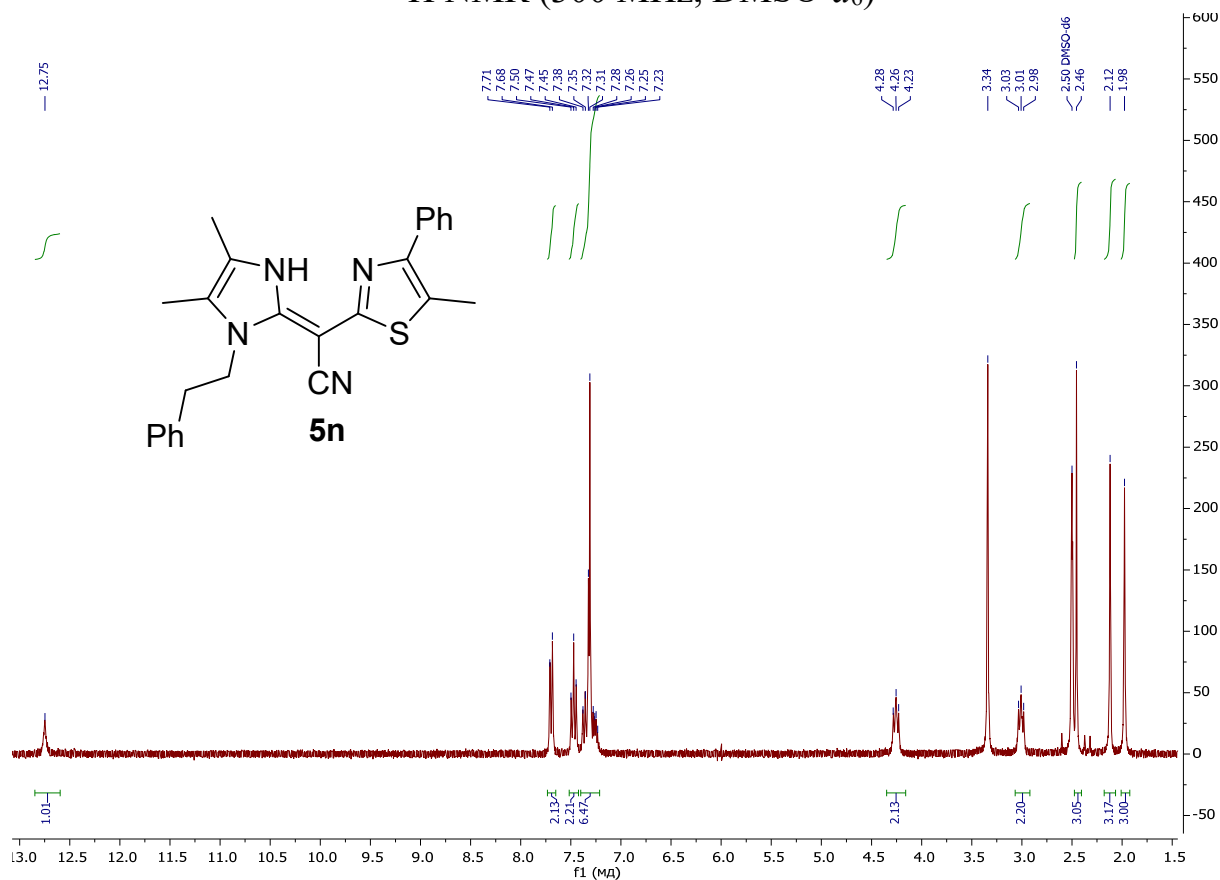

$^{13}\text{C}$  NMR (126 MHz,  $\text{DMSO-}d_6$ )

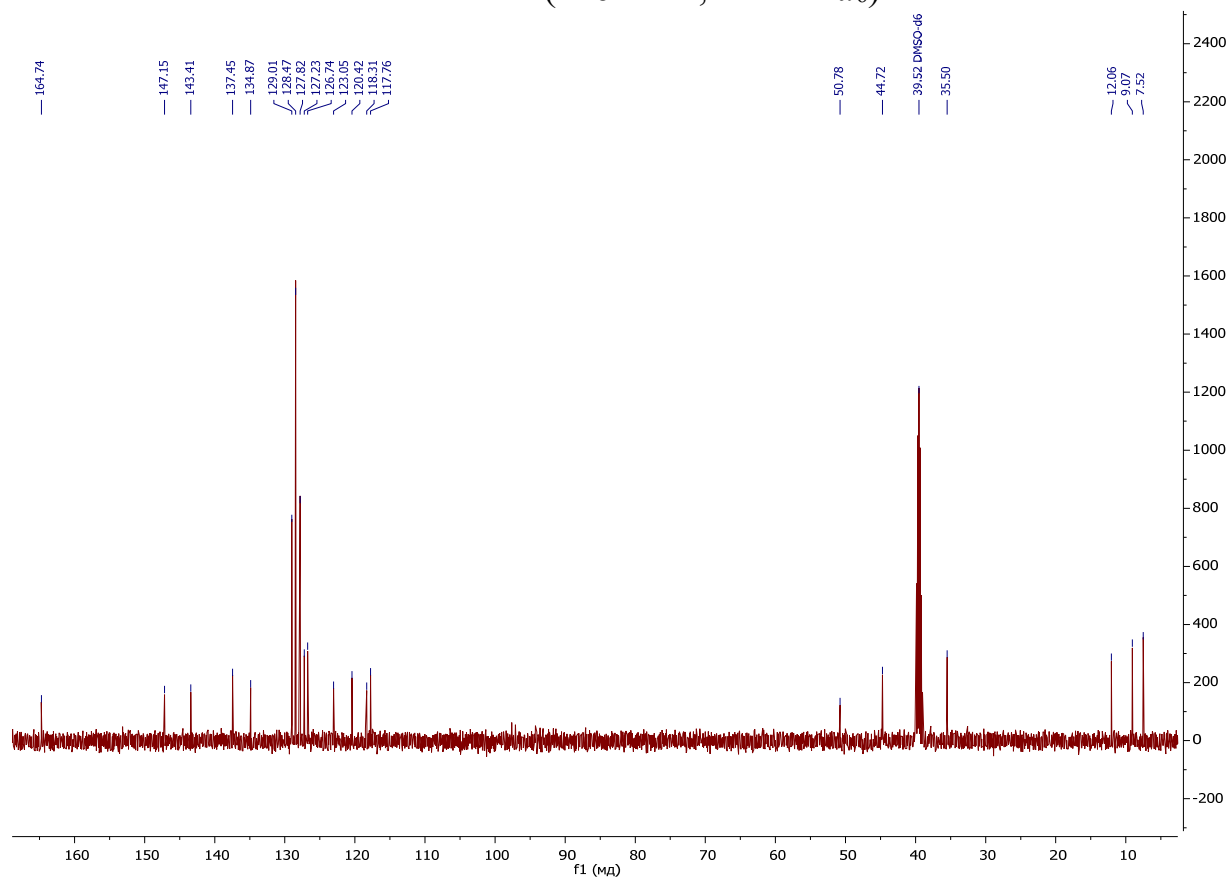



(*E*)-2-(benzo[d]thiazol-2-yl)-2-(1,4,5-trimethyl-1,3-dihydro-2H-imidazol-2-ylidene)acetonitrile (**5o**)

$^1\text{H}$  NMR (300 MHz,  $\text{DMSO-}d_6$ )

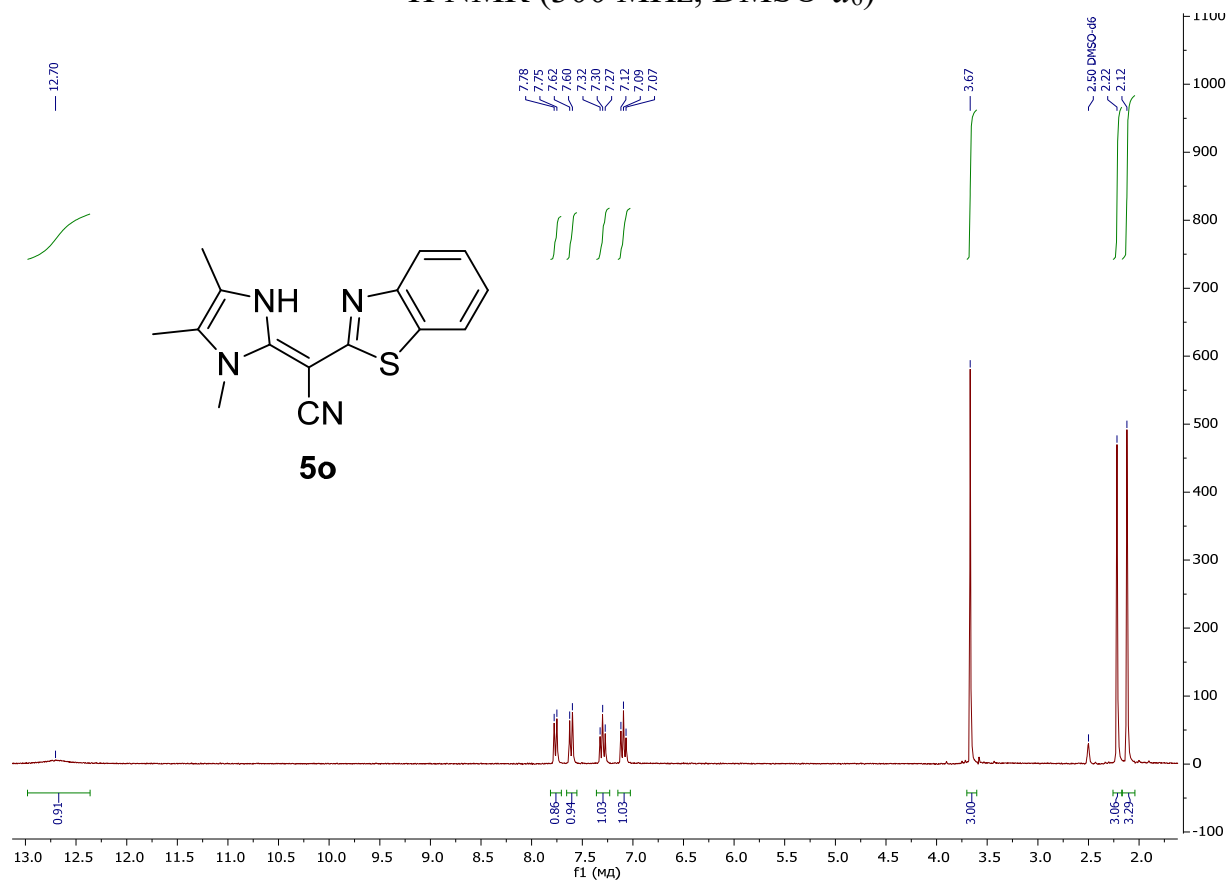

$^{13}\text{C}$  NMR (75 MHz,  $\text{DMSO-}d_6$ )

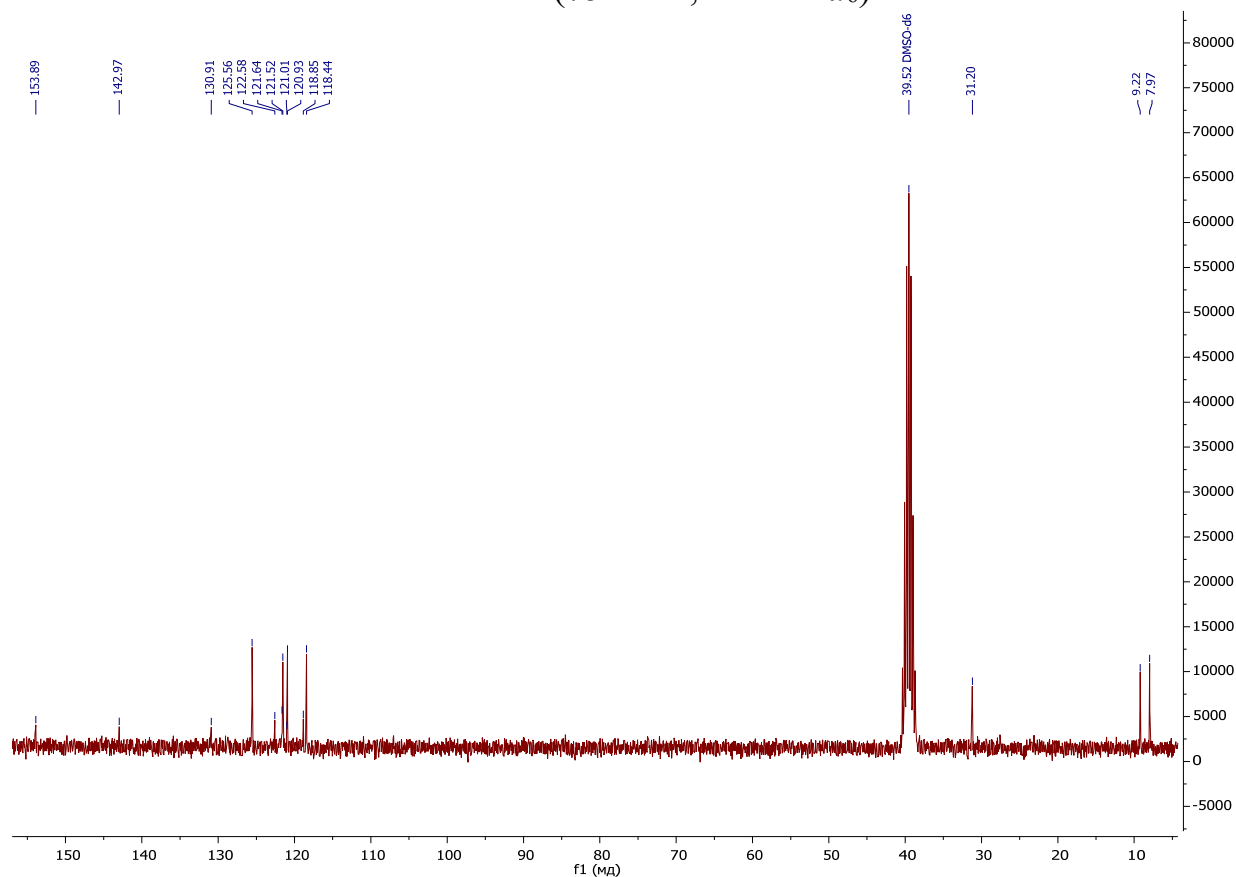

(*E*)-2-(1-allyl-4,5-dimethyl-1,3-dihydro-2H-imidazol-2-ylidene)-2-(benzo[d]thiazol-2-yl)acetonitrile (**5p**)

$^1\text{H}$  NMR (300 MHz,  $\text{DMSO-}d_6$ )

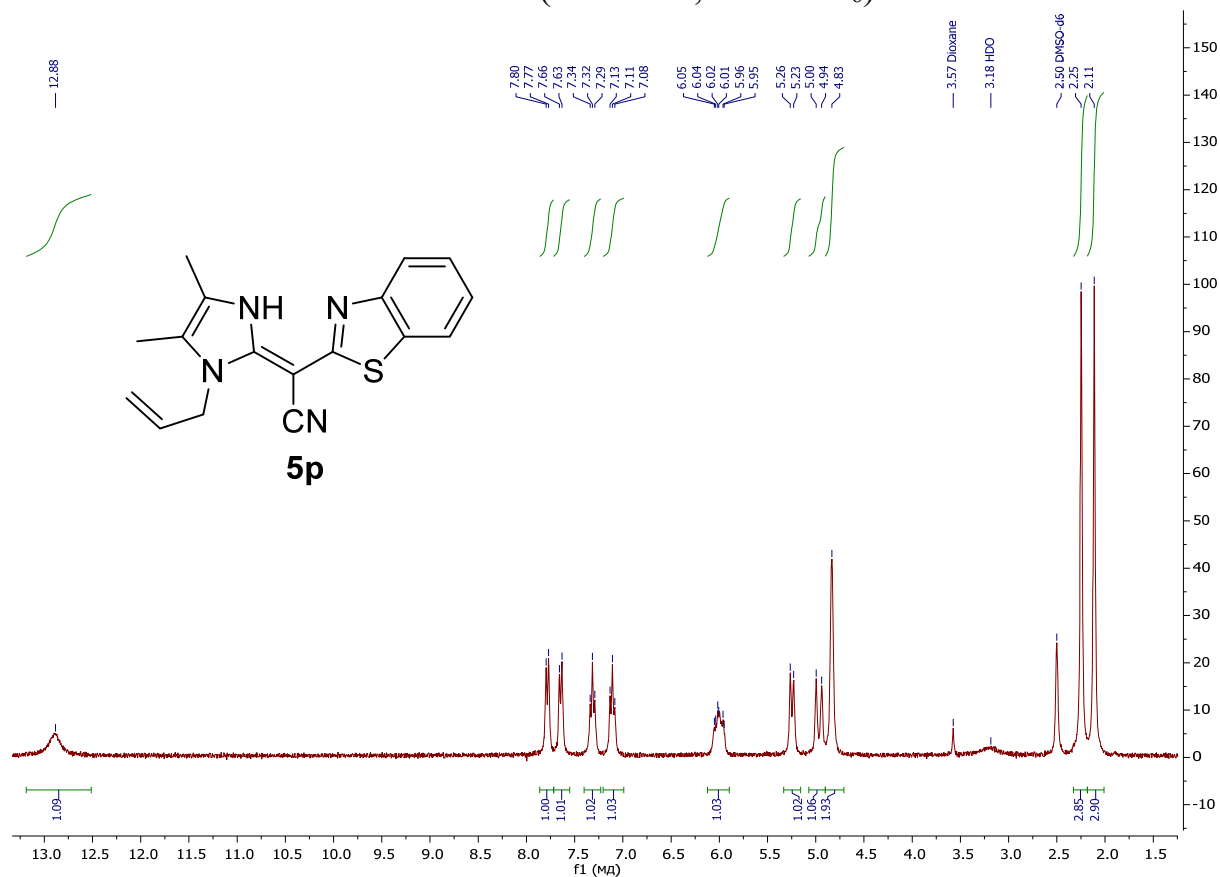

$^{13}\text{C}$  NMR (151 MHz,  $\text{DMSO-}d_6$ )

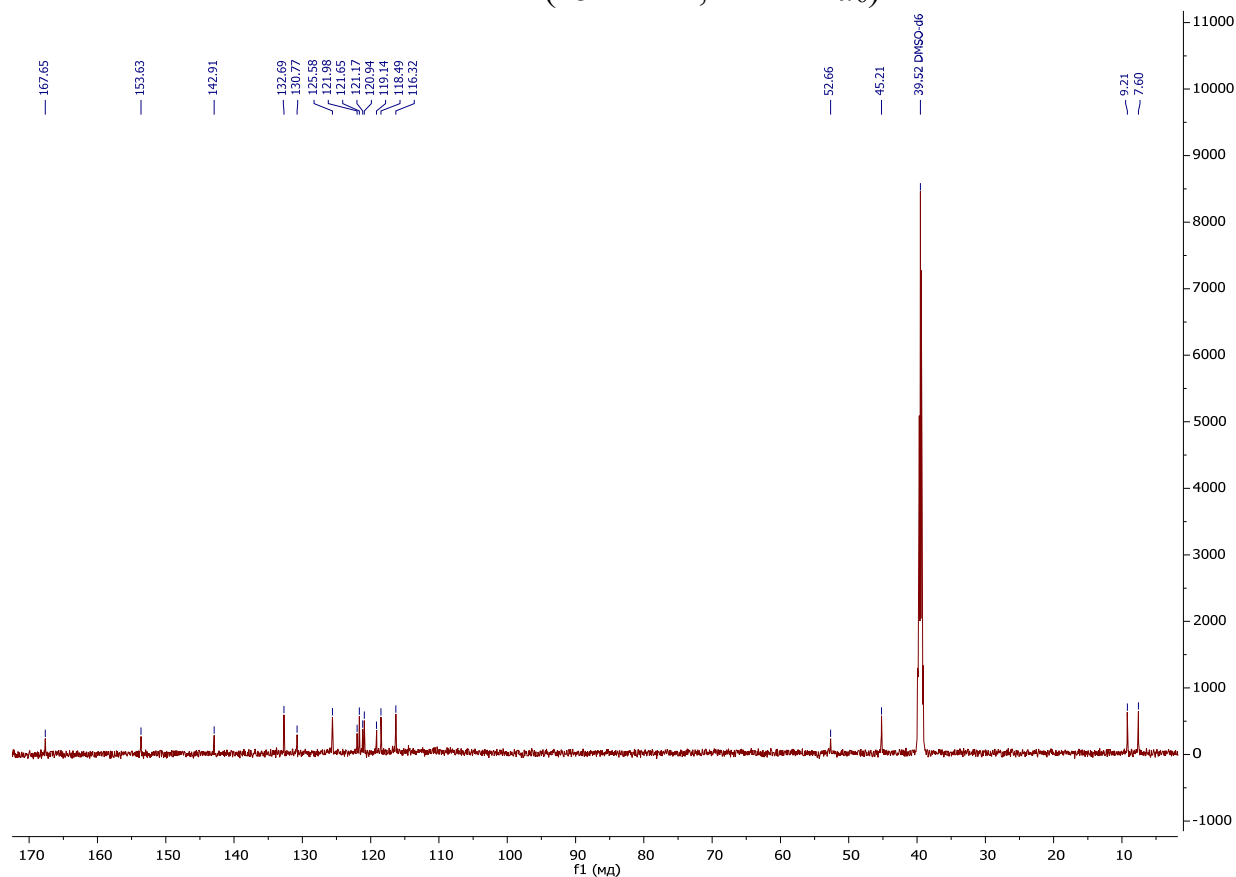

(*E*)-2-(benzo[d]thiazol-2-yl)-2-(1-(2,2-dimethoxyethyl)-4,5-dimethyl-1,3-dihydro-2H-imidazol-2-ylidene)acetonitrile (**5q**)

$^1\text{H}$  NMR (300 MHz,  $\text{DMSO-}d_6$ )

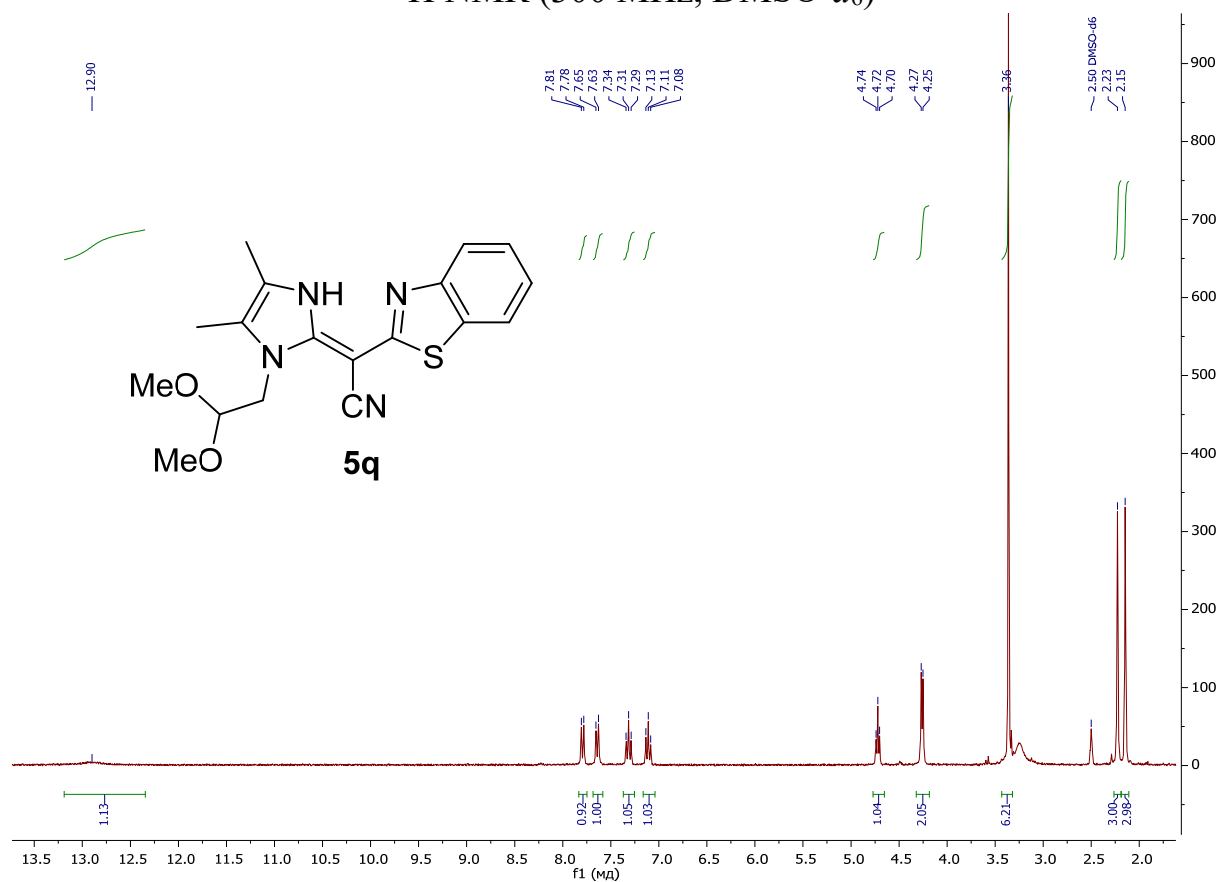

$^{13}\text{C}$  NMR (75 MHz,  $\text{DMSO-}d_6$ )

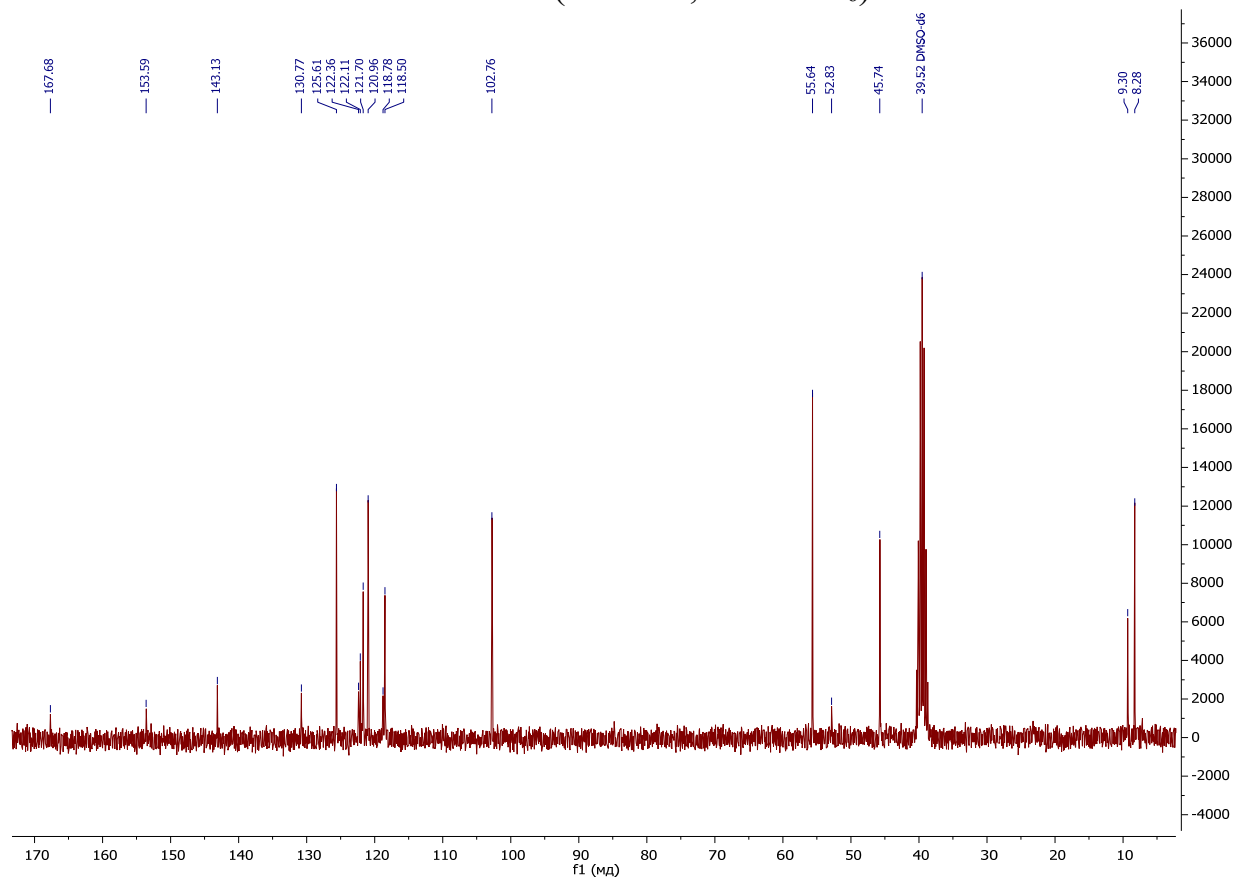

(*E*)-2-(benzo[d]thiazol-2-yl)-2-(1-benzyl-4,5-dimethyl-1,3-dihydro-2H-imidazol-2-ylidene)acetonitrile (**5r**)

$^1\text{H}$  NMR (300 MHz,  $\text{DMSO-}d_6$ )

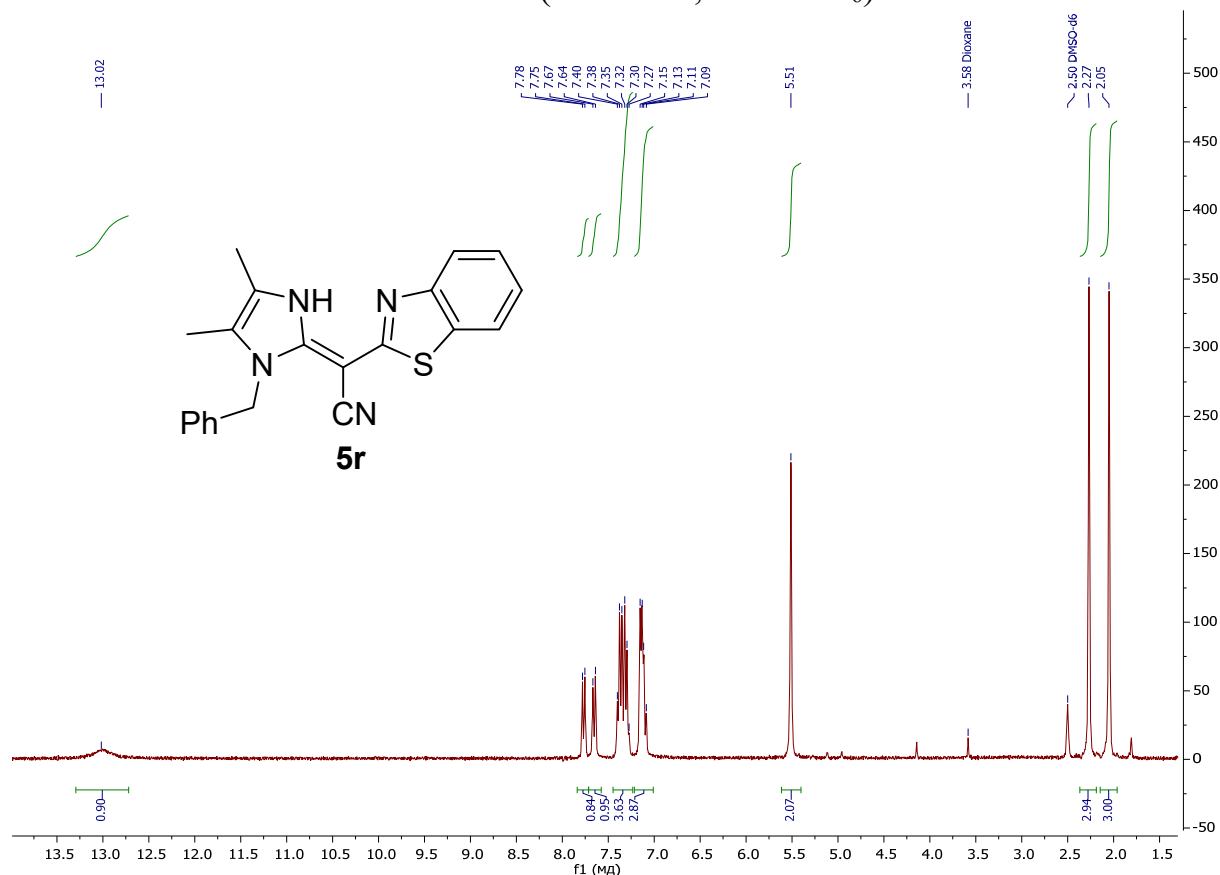

$^{13}\text{C}$  NMR (126 MHz,  $\text{DMSO-}d_6$ )

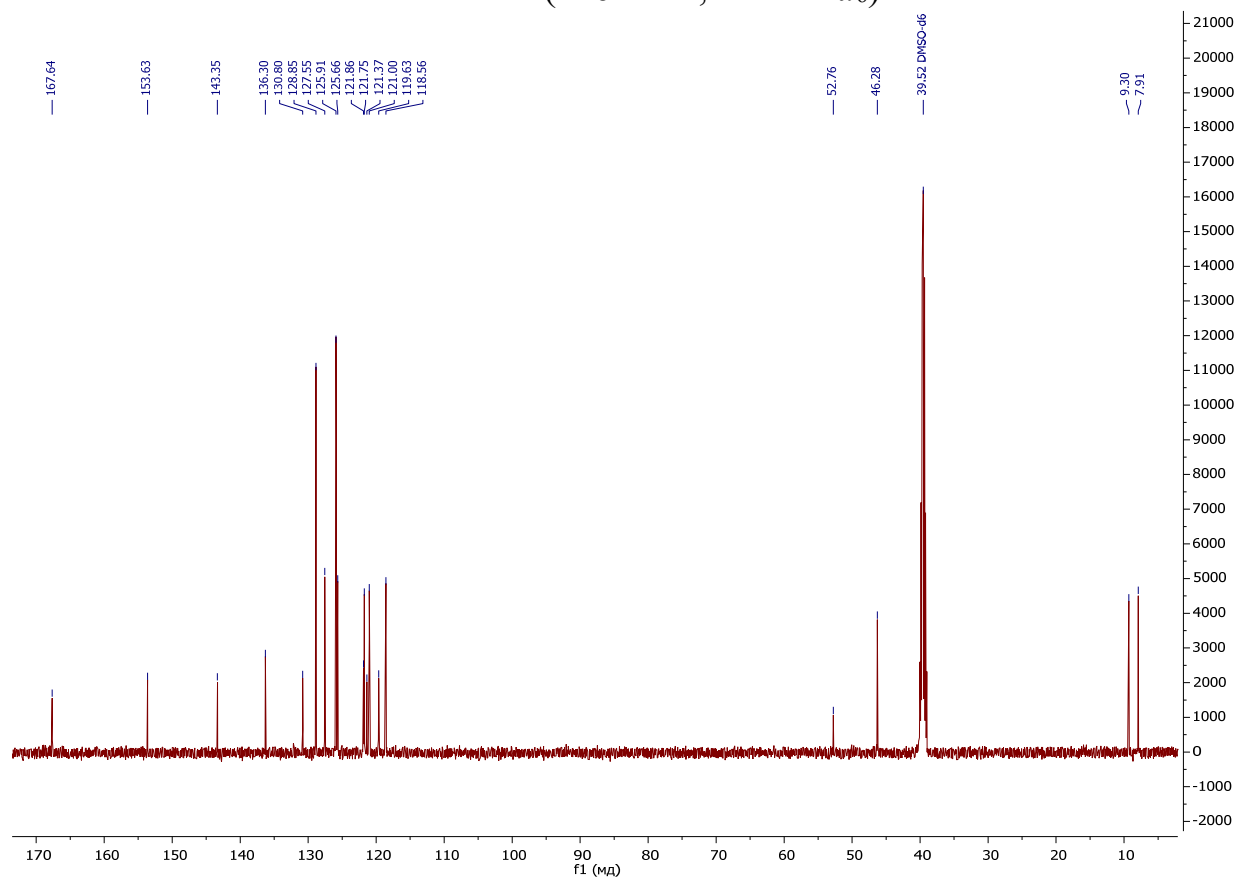

(*E*)-N-(5-(cyano(1,4,5-trimethyl-1,3-dihydro-2H-imidazol-2-ylidene)methyl)-1,3,4-thiadiazol-2-yl)benzamide (**5s**)

$^1\text{H}$  NMR (300 MHz,  $\text{DMSO-}d_6$ )

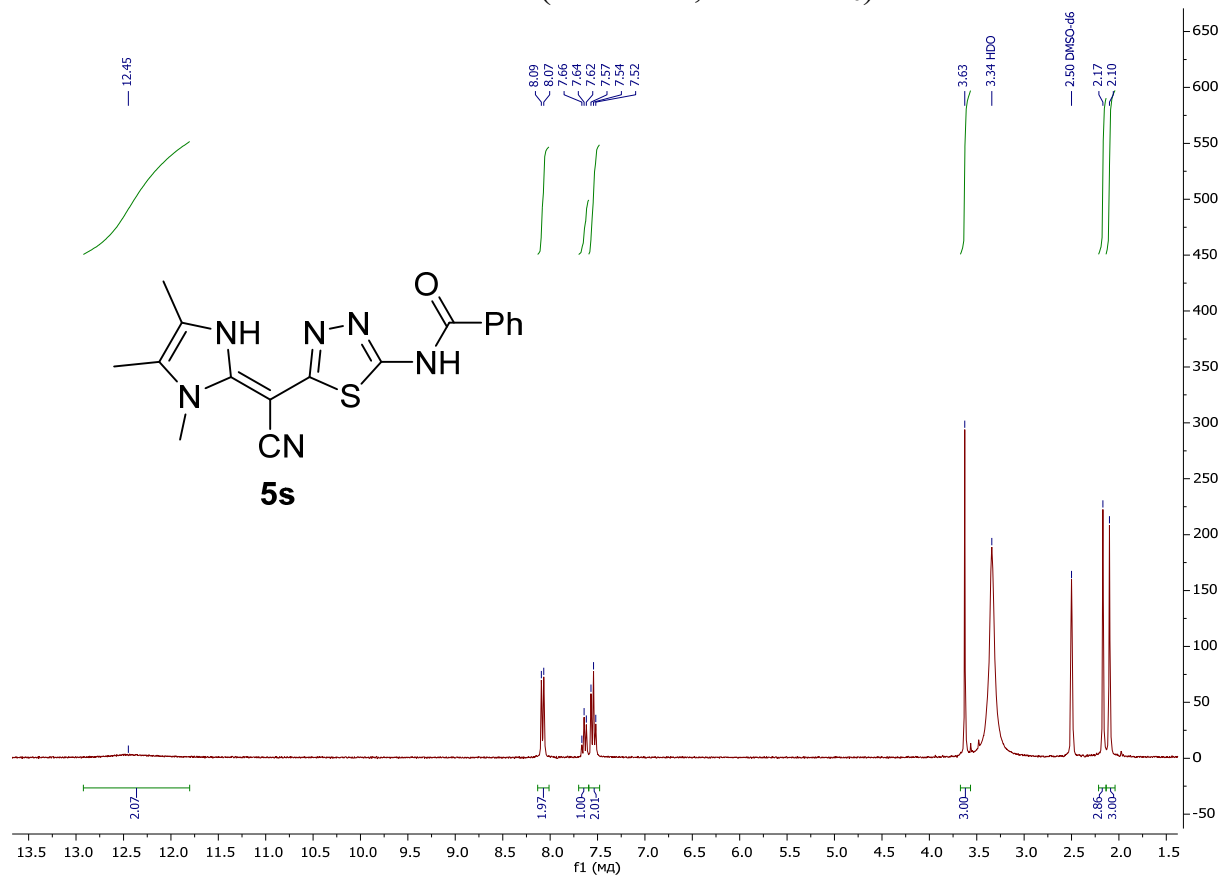

$^{13}\text{C}$  NMR (151 MHz,  $\text{DMSO-}d_6$ )

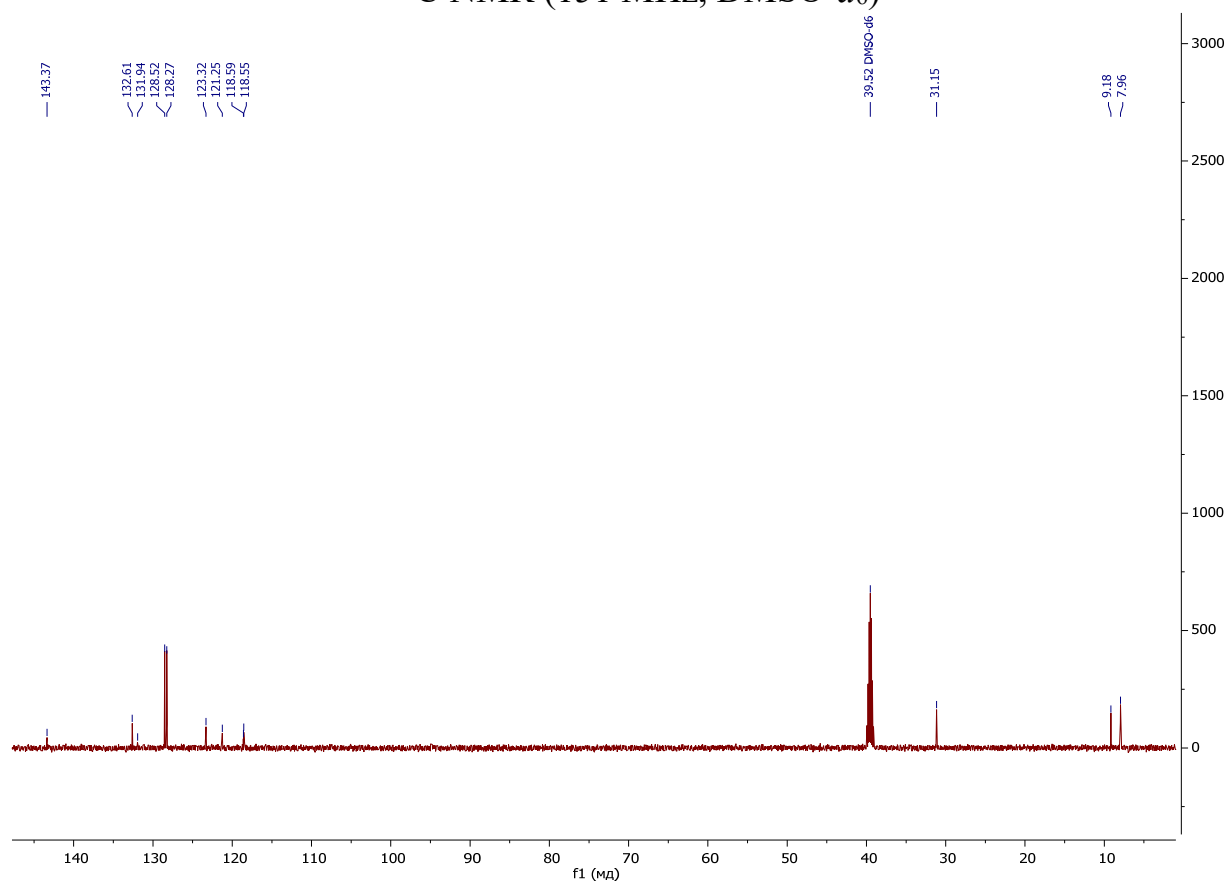

(*E*)-N-(5-((1-benzyl-4,5-dimethyl-1,3-dihydro-2H-imidazol-2-ylidene)(cyano)methyl)-1,3,4-thiadiazol-2-yl)benzamide (**5t**)

$^1\text{H}$  NMR (300 MHz,  $\text{DMSO-}d_6$ )

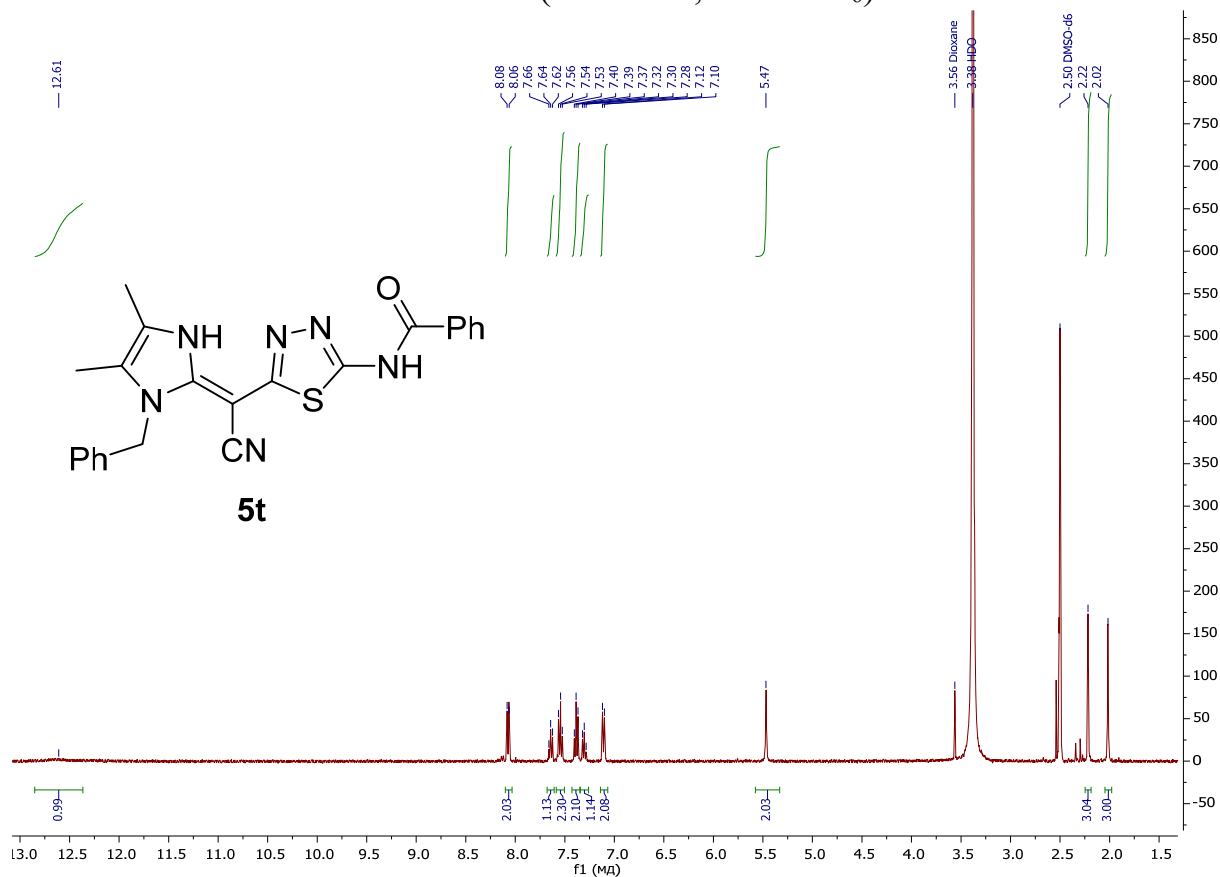

$^{13}\text{C}$  NMR (151 MHz,  $\text{DMSO-}d_6$ )

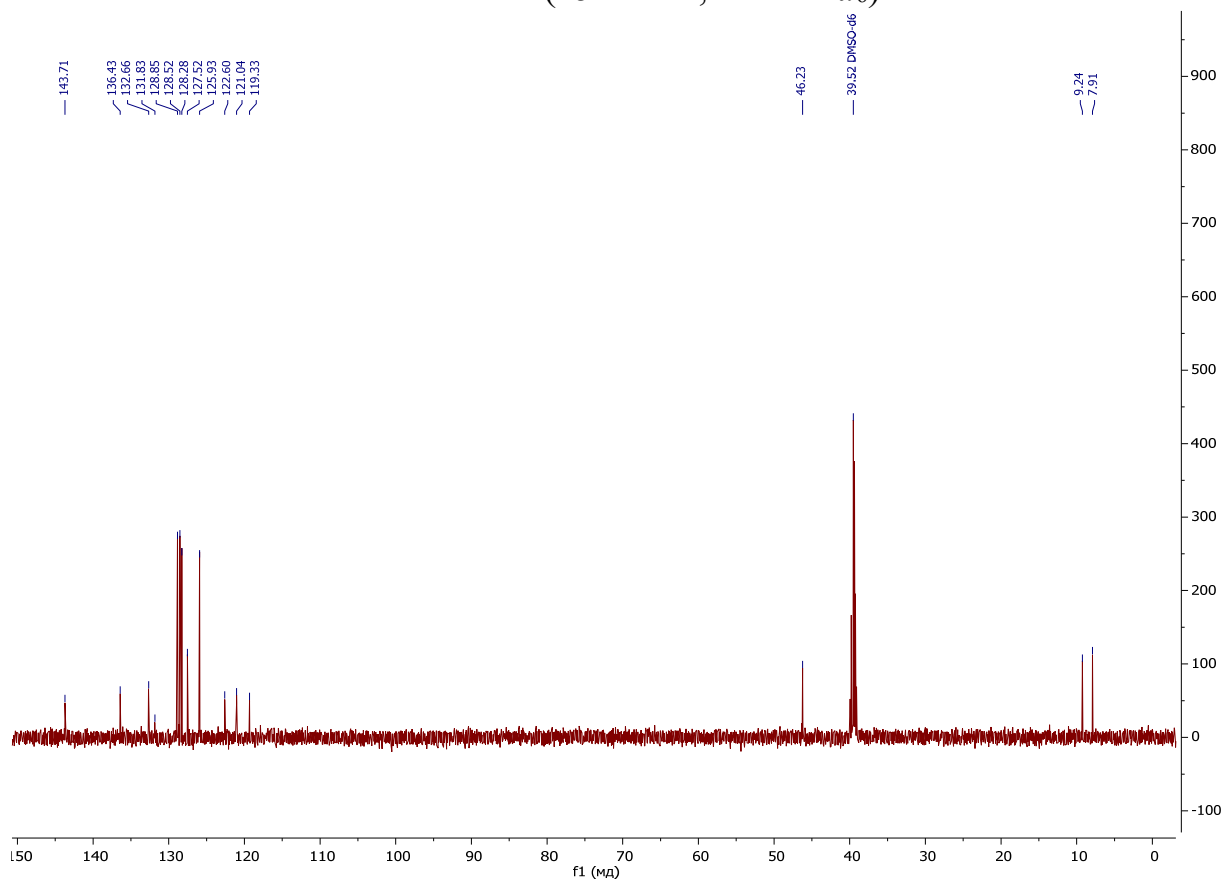

2-(1,3-Dihydro-2H-benzo[d]imidazol-2-ylidene)-2-(1,4,5-trimethyl-1H-imidazol-2-yl)acetonitrile (**5u**)

$^1\text{H}$  NMR (300 MHz,  $\text{DMSO-}d_6$ )

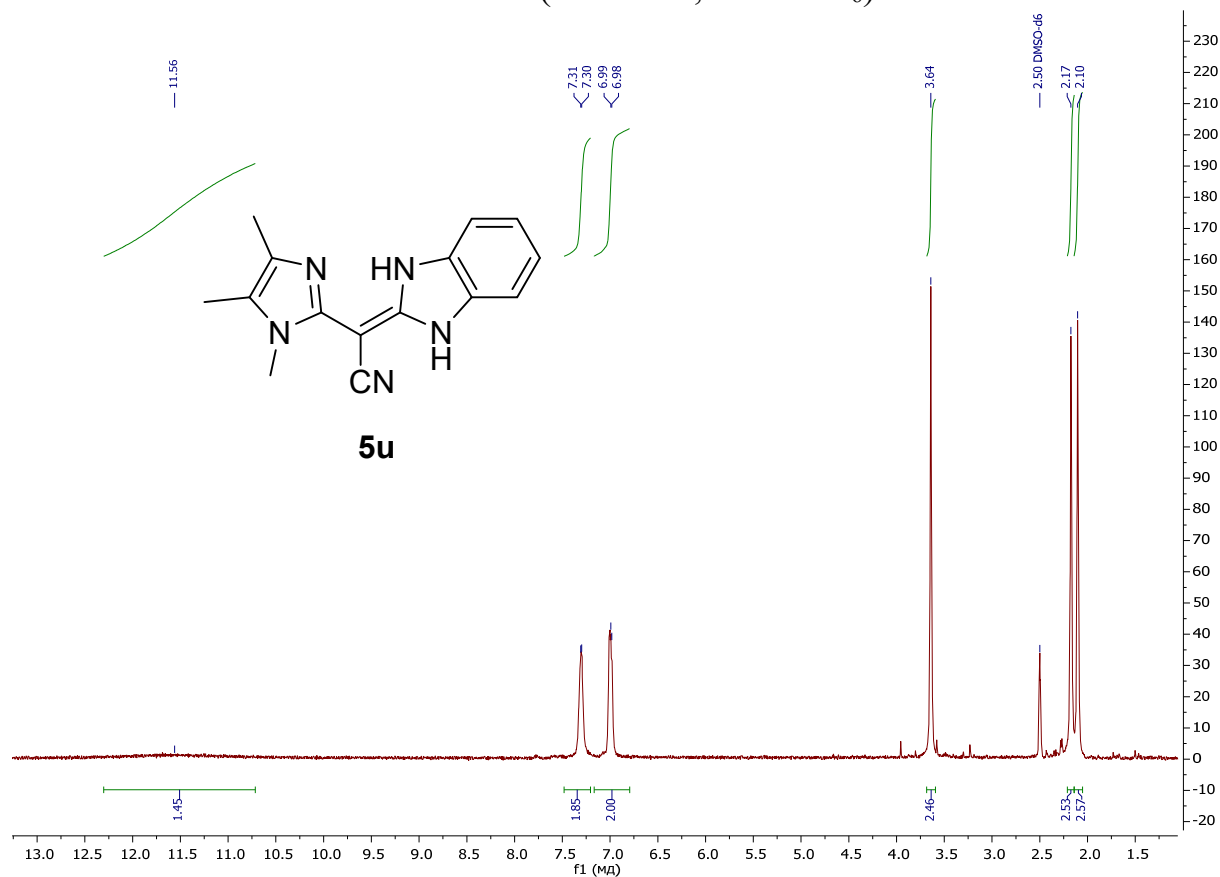

$^{13}\text{C}$  NMR (126 MHz,  $\text{DMSO-}d_6$ )

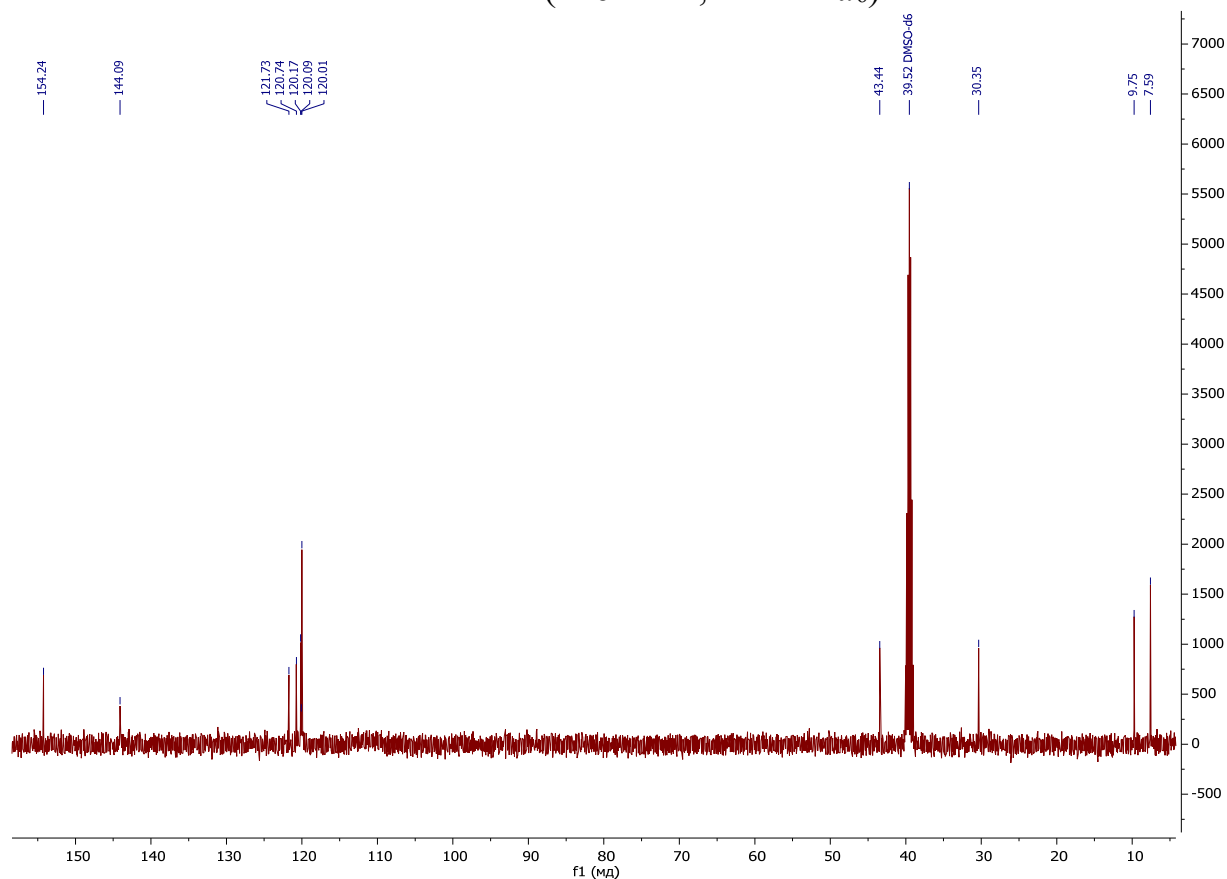

2-(1-Benzyl-4,5-dimethyl-1H-imidazol-2-yl)-2-(1,3-dihydro-2H-benzo[d]imidazol-2-ylidene)acetonitrile (**5v**)

$^1\text{H}$  NMR (400 MHz,  $\text{DMSO-}d_6$ )

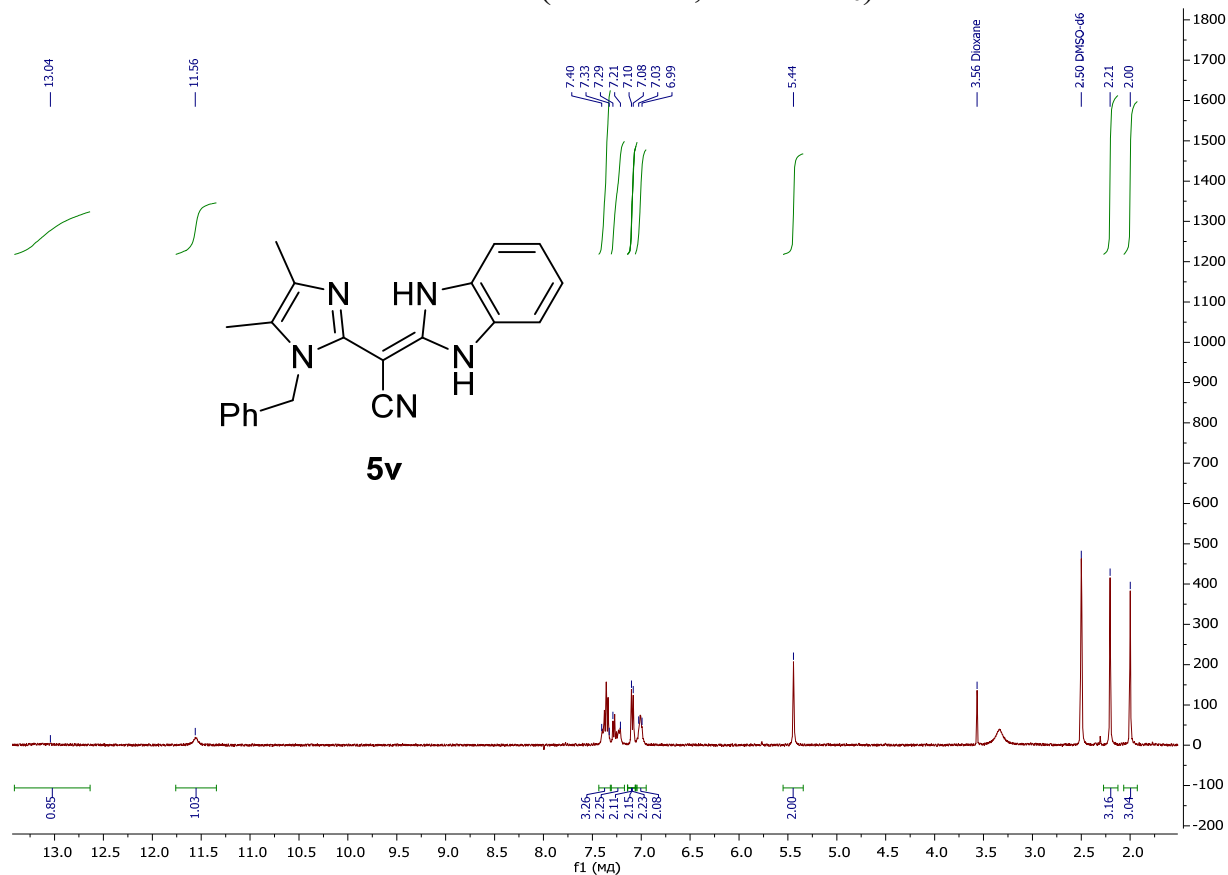

$^{13}\text{C}$  NMR (126 MHz,  $\text{DMSO-}d_6$ )

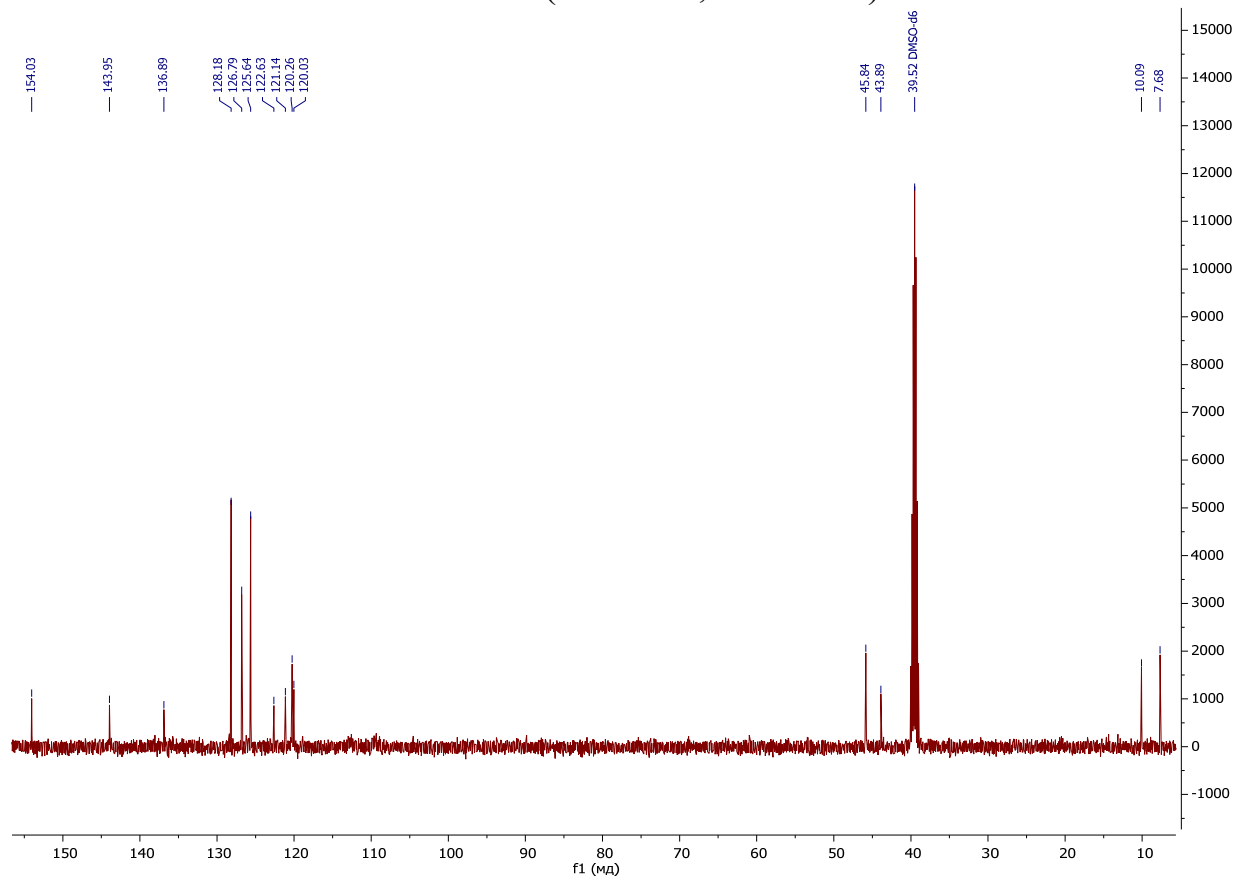



(*E*)-2-(benzo[d]oxazol-2-yl)-2-(1,4,5-trimethyl-1,3-dihydro-2H-imidazol-2-ylidene)acetonitrile (**5w**)

$^1\text{H}$  NMR (300 MHz,  $\text{DMSO-}d_6$ )

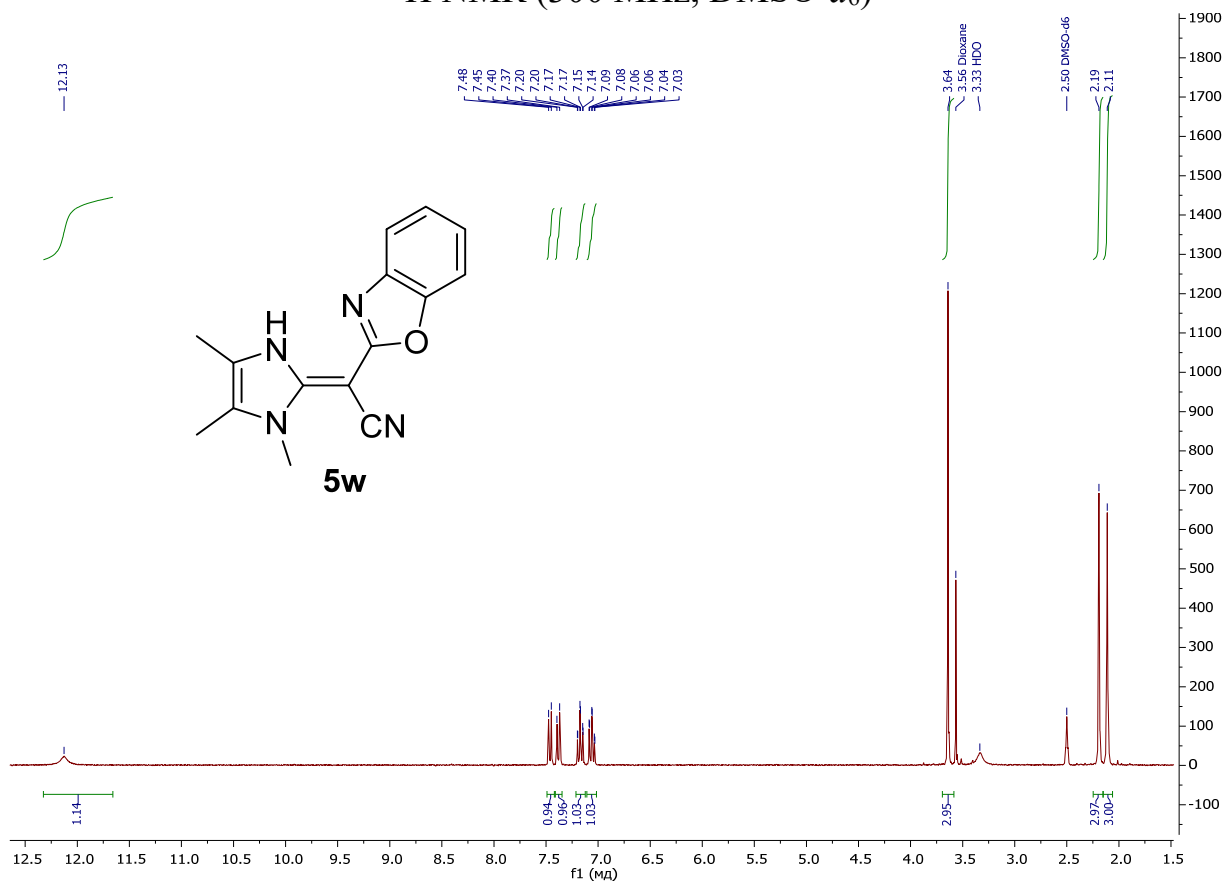

$^{13}\text{C}$  NMR (151 MHz,  $\text{DMSO-}d_6$ )

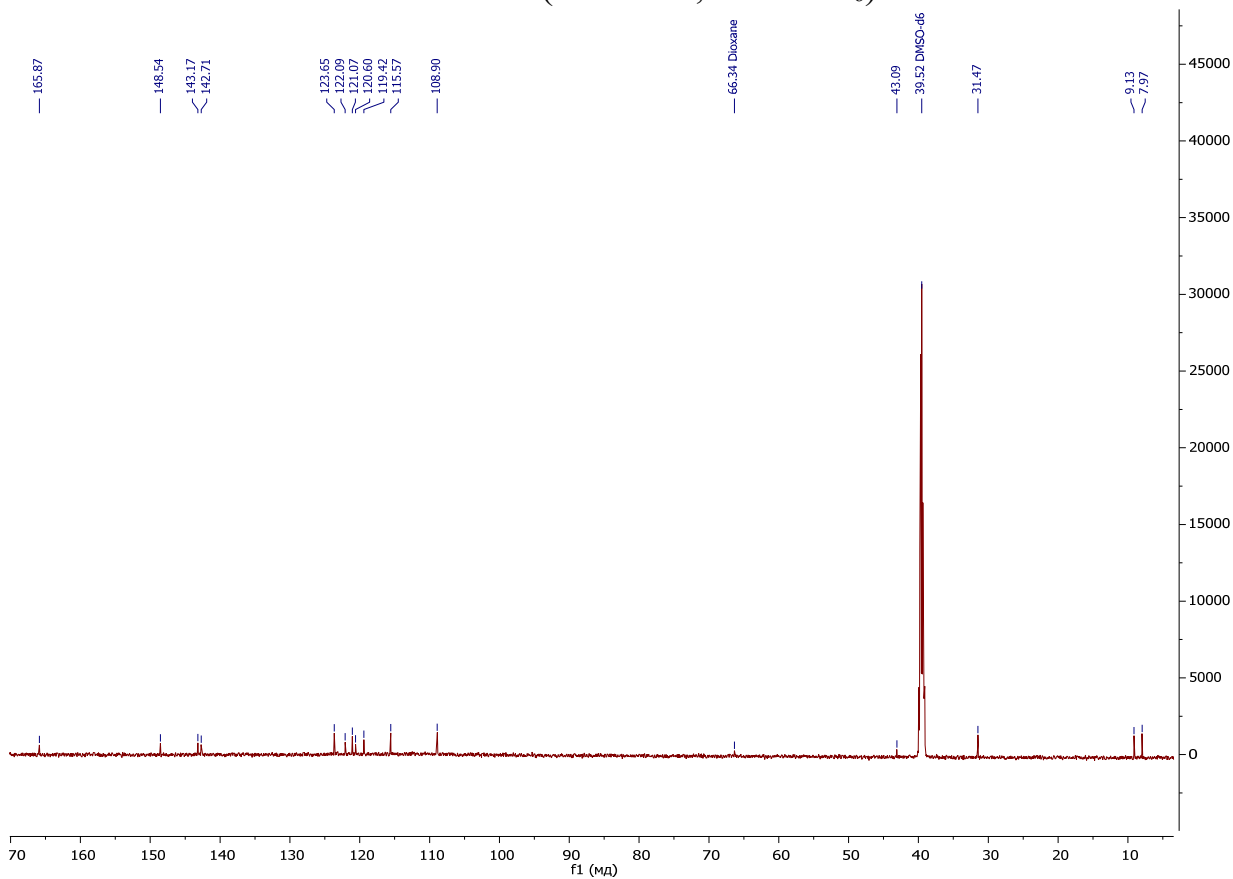

(*E*)-2-(benzo[d]oxazol-2-yl)-2-(1-benzyl-4,5-dimethyl-1,3-dihydro-2H-imidazol-2-ylidene)acetonitrile (**5x**)

<sup>1</sup>H NMR (300 MHz, DMSO-*d*<sub>6</sub>)

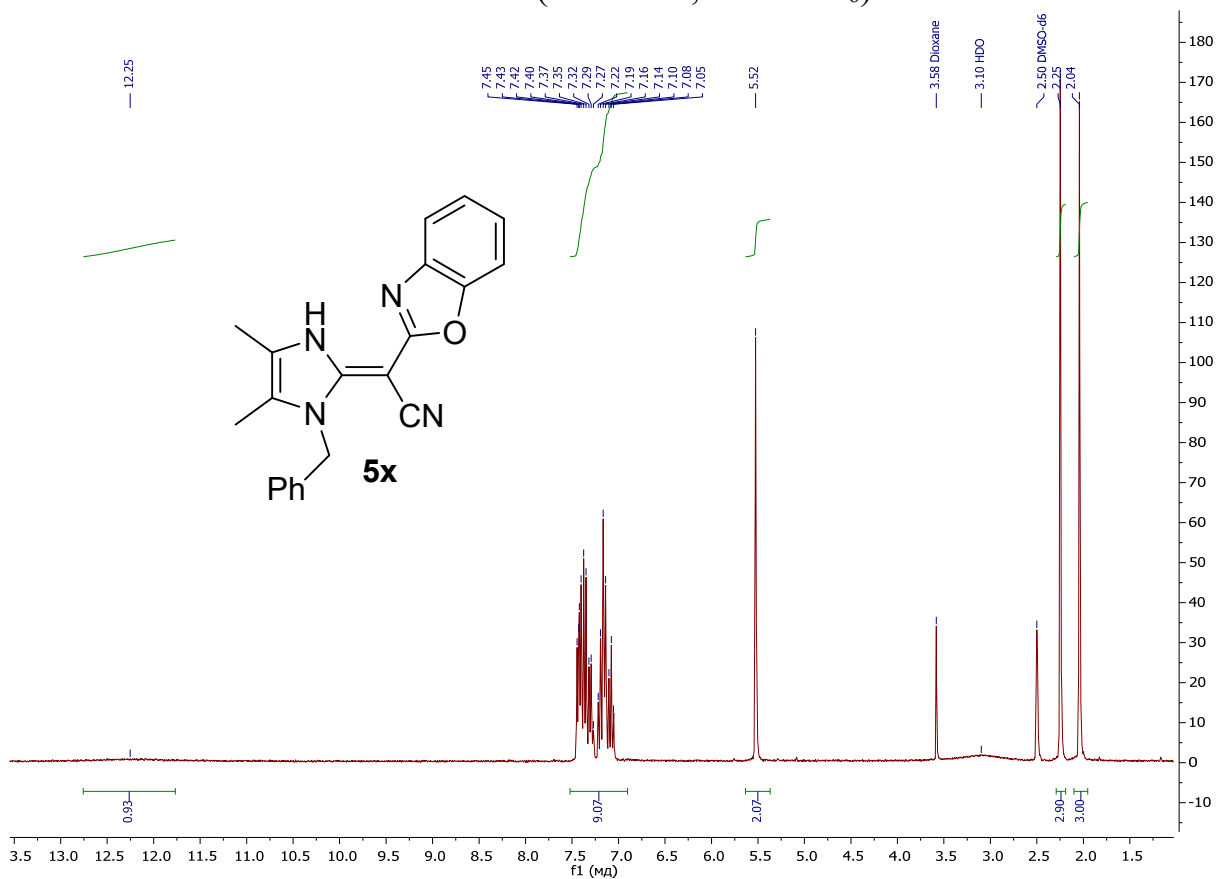

2-((1-Benzyl-4,5-dimethyl-1H-imidazol-2-yl)methyl)-4-phenylthiazole (**6d**)  
<sup>1</sup>H NMR (300 MHz, DMSO-*d*<sub>6</sub>)

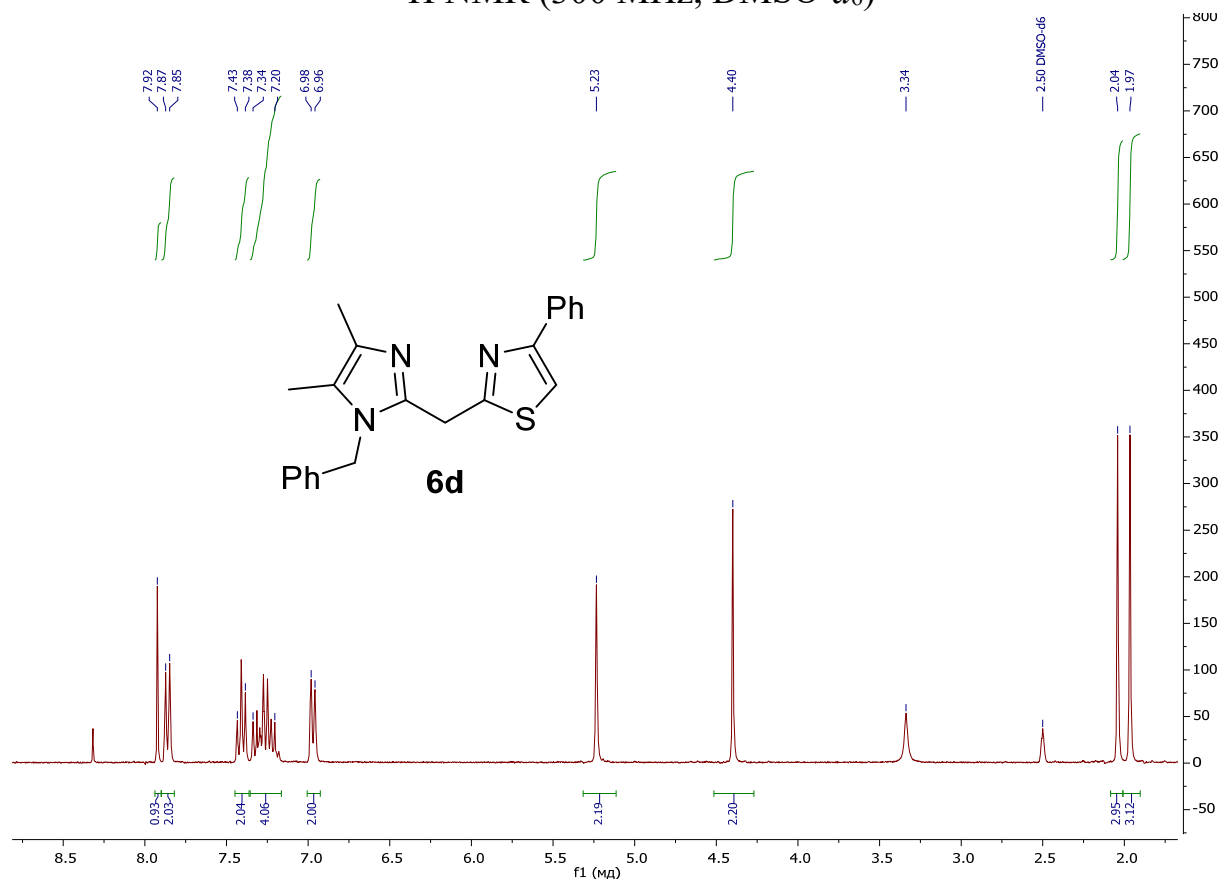

<sup>13</sup>C NMR (75 MHz, DMSO-*d*<sub>6</sub>)

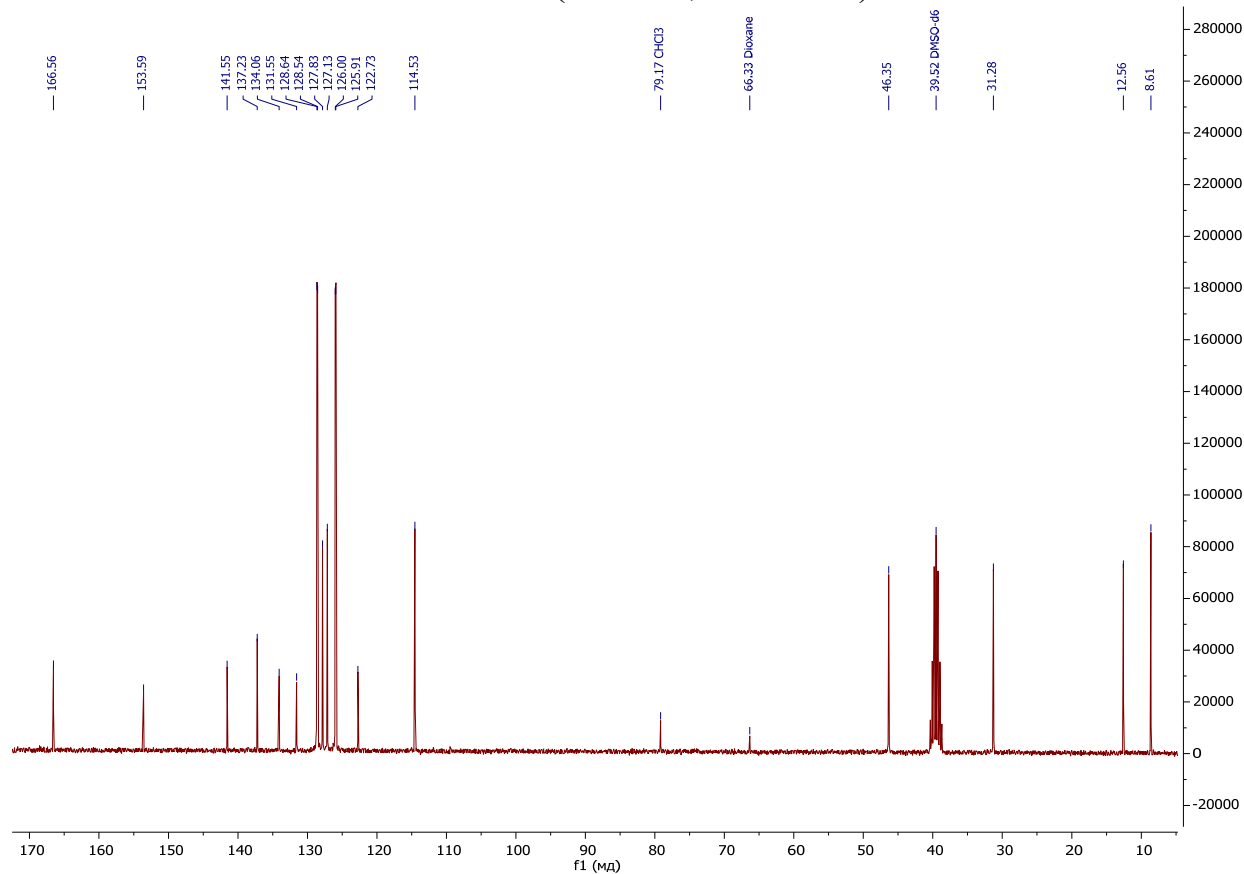

# 2-((1-Benzyl-4,5-dimethyl-1H-imidazol-2-yl)methyl)-4-(naphthalen-2-yl)thiazole (6g)

<sup>1</sup>H NMR (400 MHz, DMSO-d<sub>6</sub>)

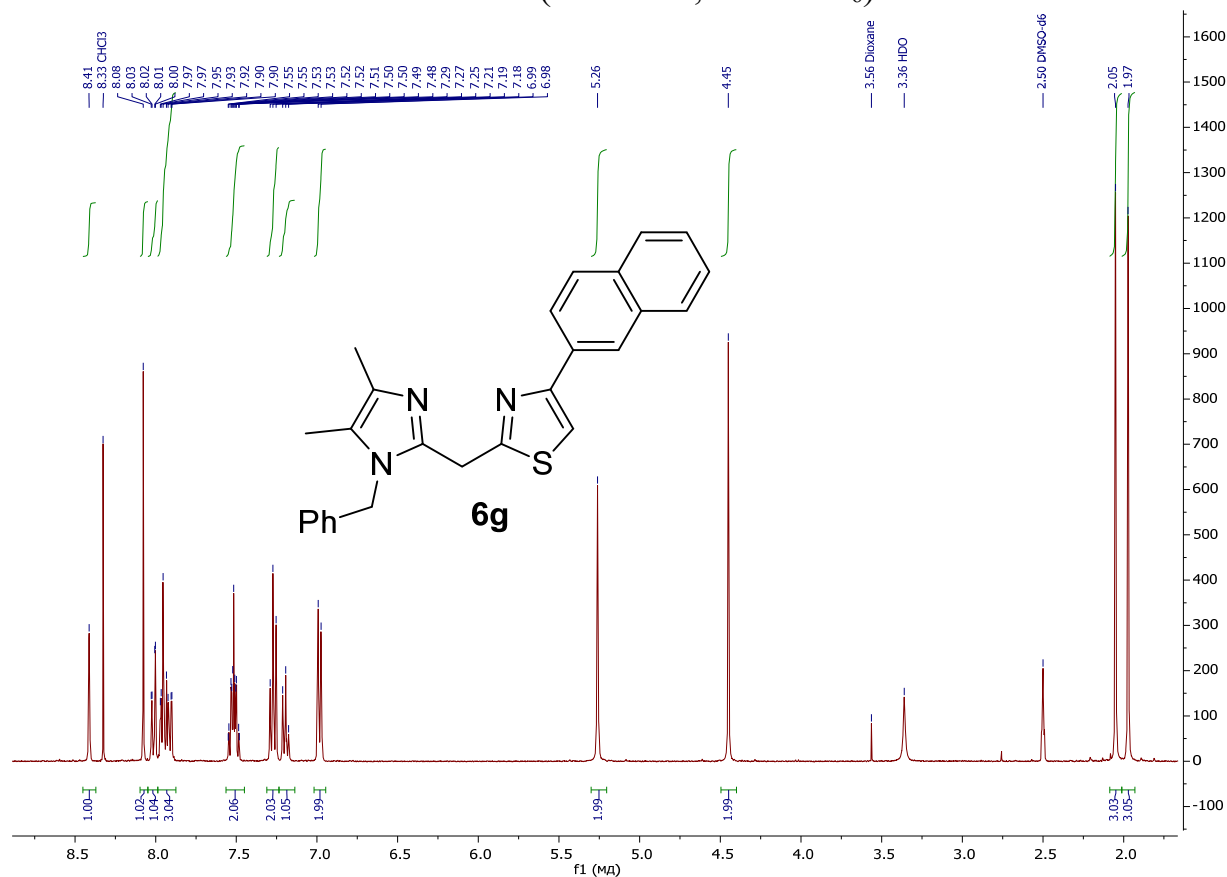

<sup>13</sup>C NMR (75 MHz, DMSO-d<sub>6</sub>)

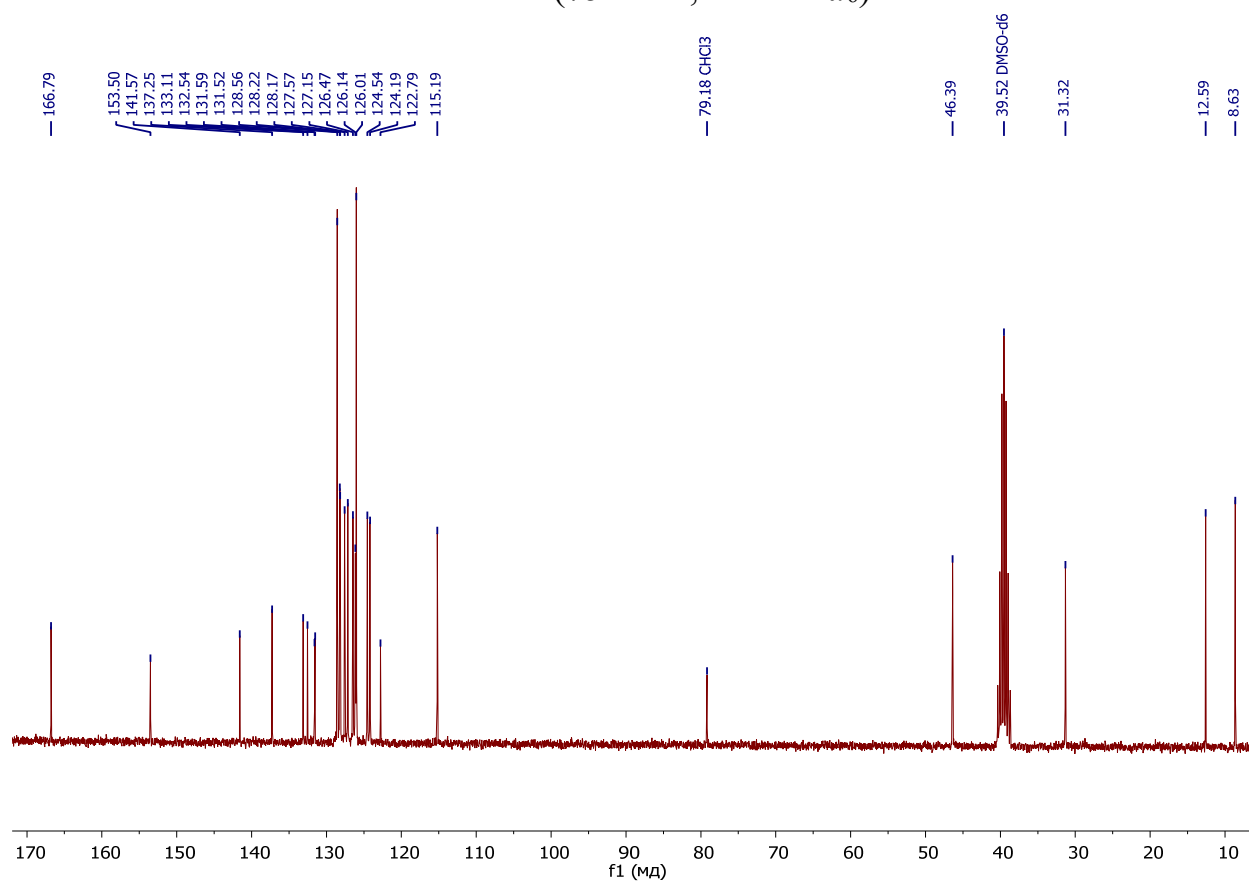

# 2-((1-Benzyl-4,5-dimethyl-1H-imidazol-2-yl)methyl)-4-(3-nitrophenyl)thiazole (6i)

$^1\text{H NMR}$  (600 MHz,  $\text{DMSO-}d_6$ )

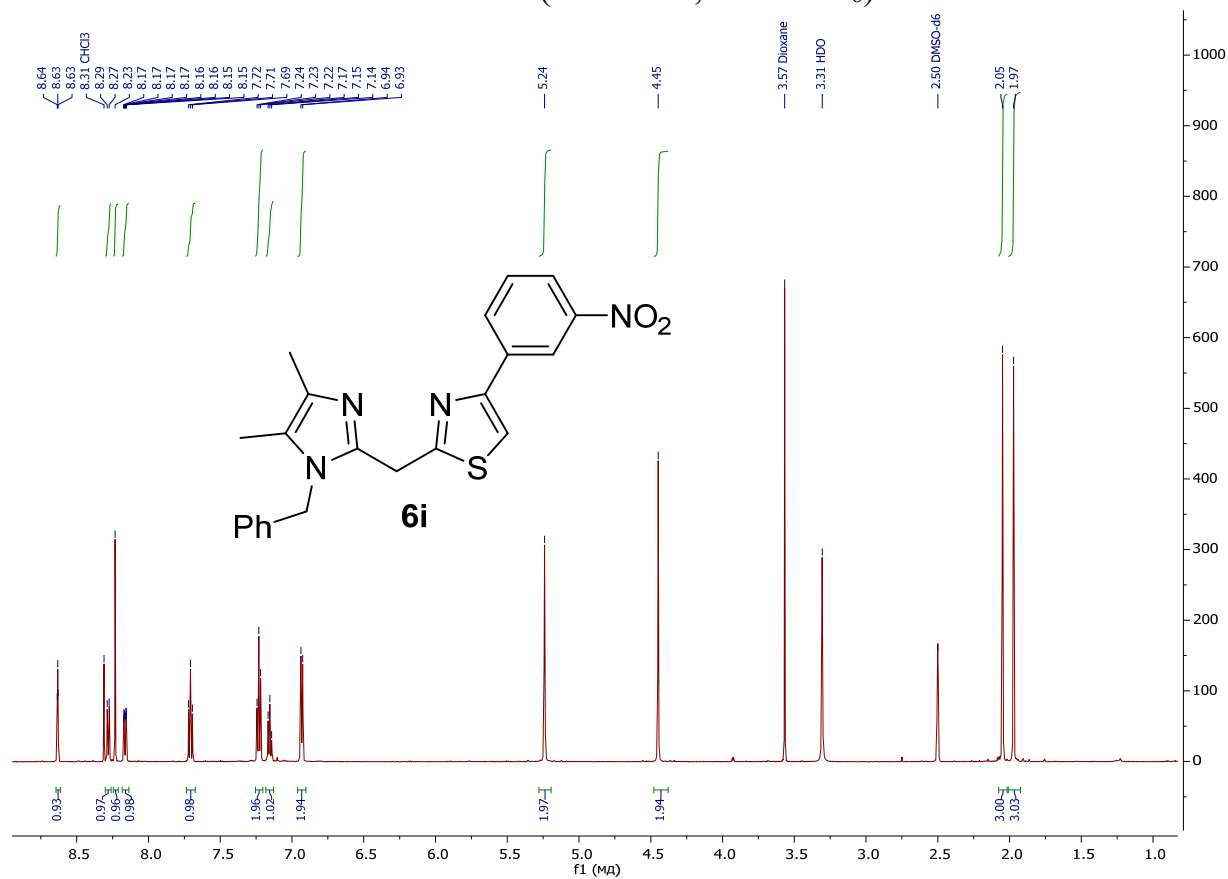

$^{13}\text{C NMR}$  (151 MHz,  $\text{DMSO-}d_6$ )

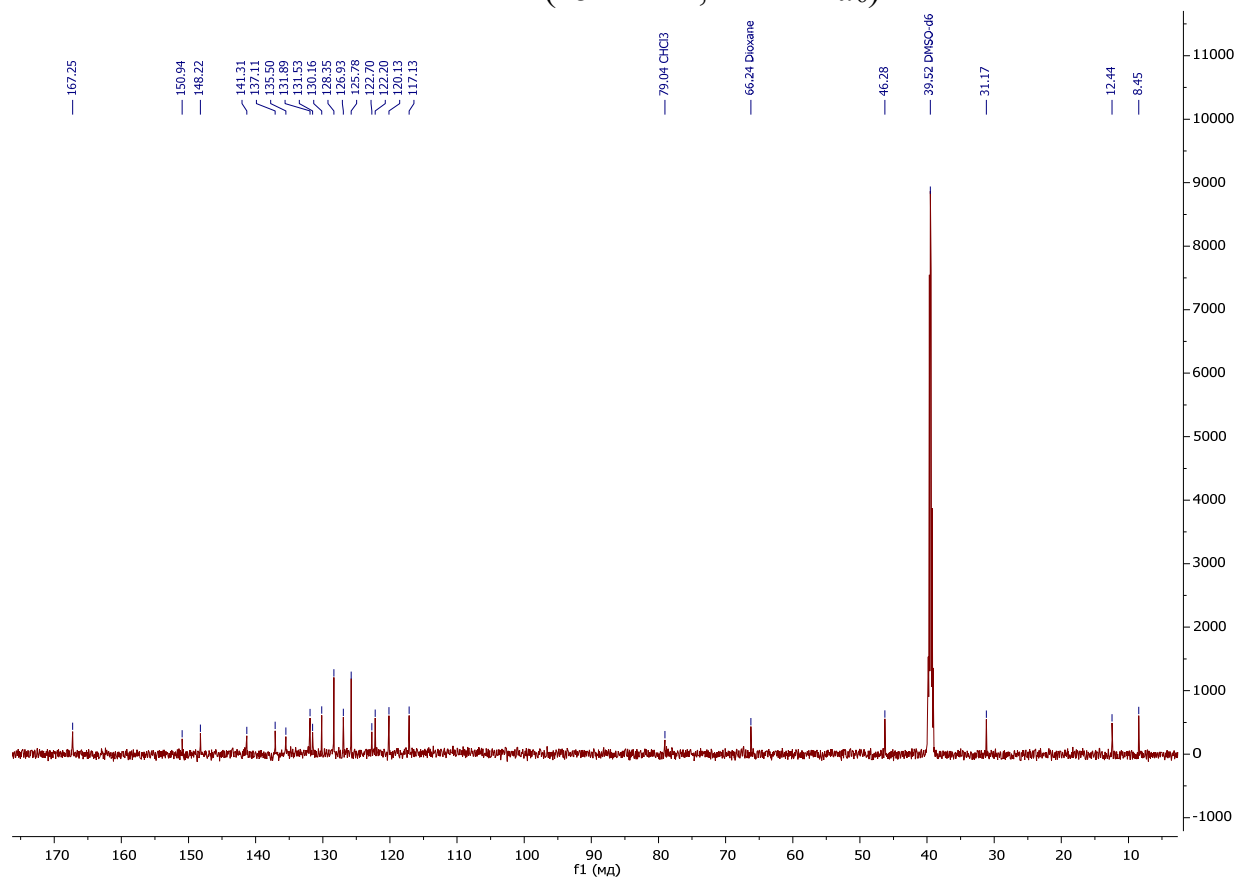

2-((1-Benzyl-4,5-dimethyl-1H-imidazol-2-yl)methyl)-5-methyl-4-phenylthiazole  
(6m)

$^1\text{H}$  NMR (500 MHz,  $\text{DMSO-}d_6$ )

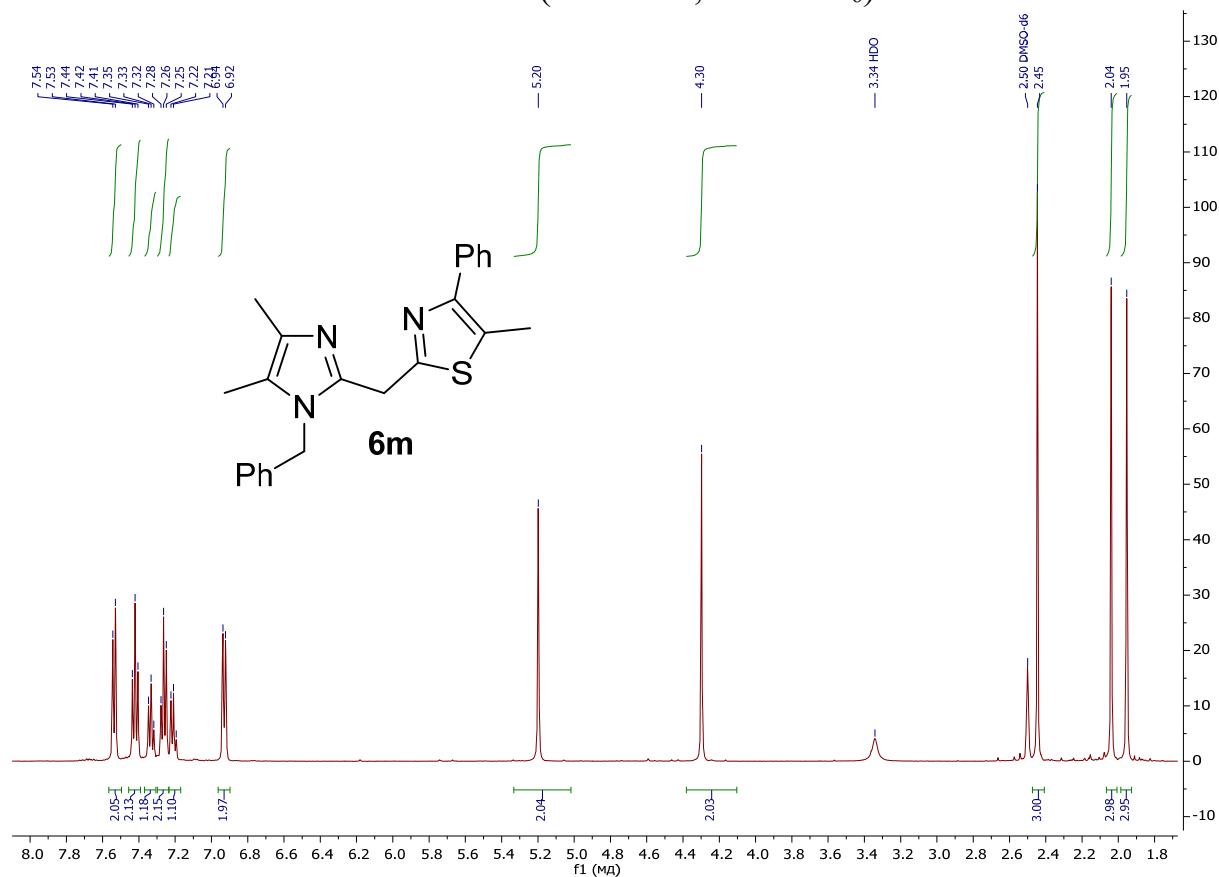

$^{13}\text{C}$  NMR (75 MHz,  $\text{DMSO-}d_6$ )

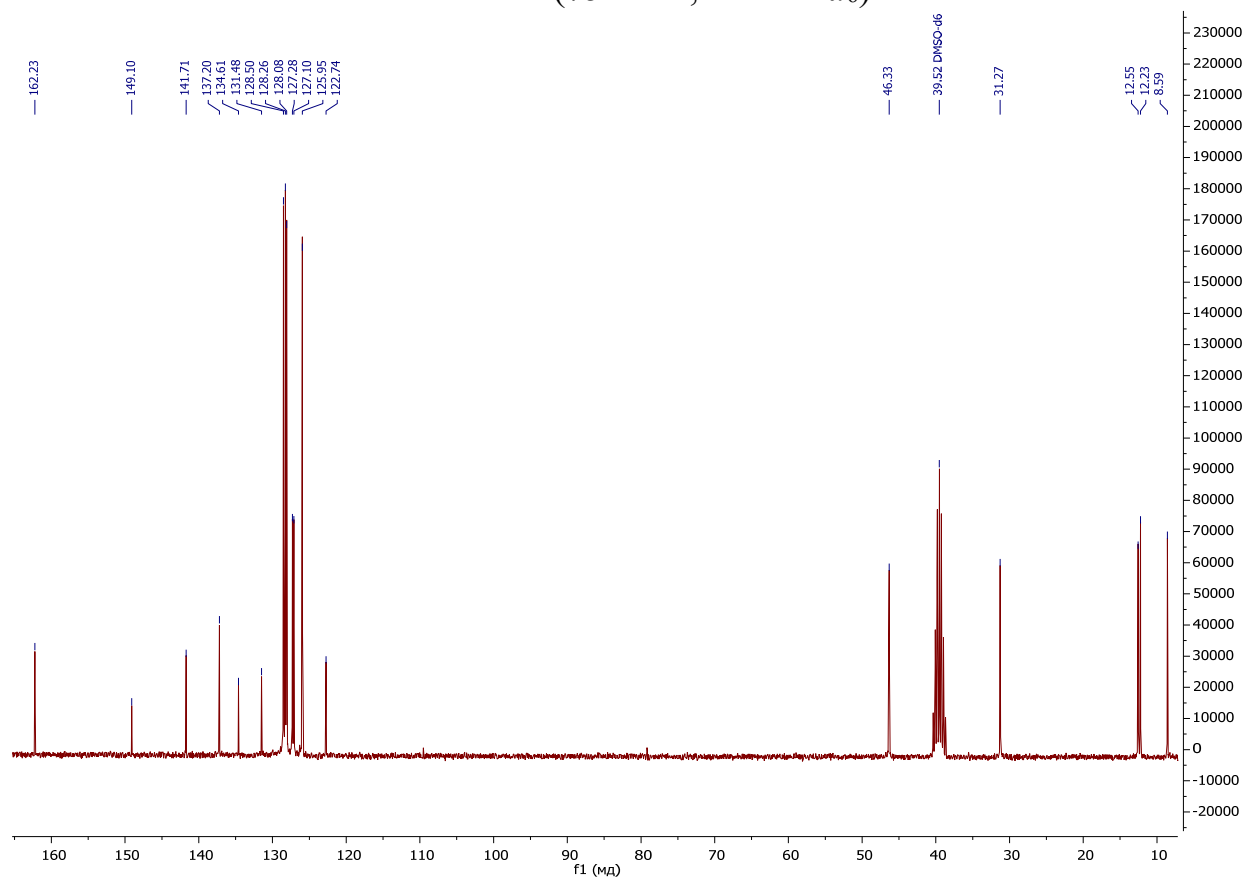

2-((1-Benzyl-4,5-dimethyl-1H-imidazol-2-yl)methyl)benzo[d]thiazole (**6r**)  
<sup>1</sup>H NMR (300 MHz, DMSO-*d*<sub>6</sub>)

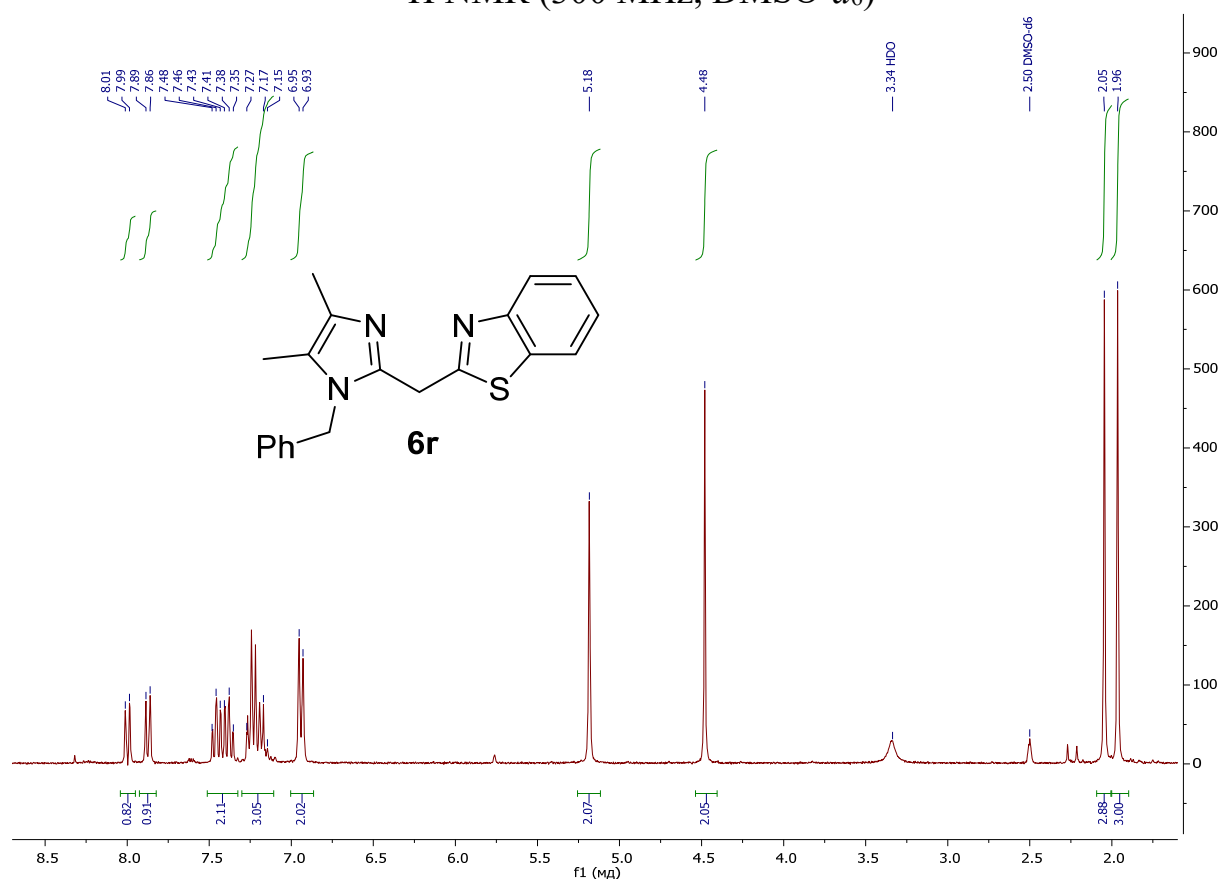

<sup>13</sup>C NMR (75 MHz, DMSO-*d*<sub>6</sub>)

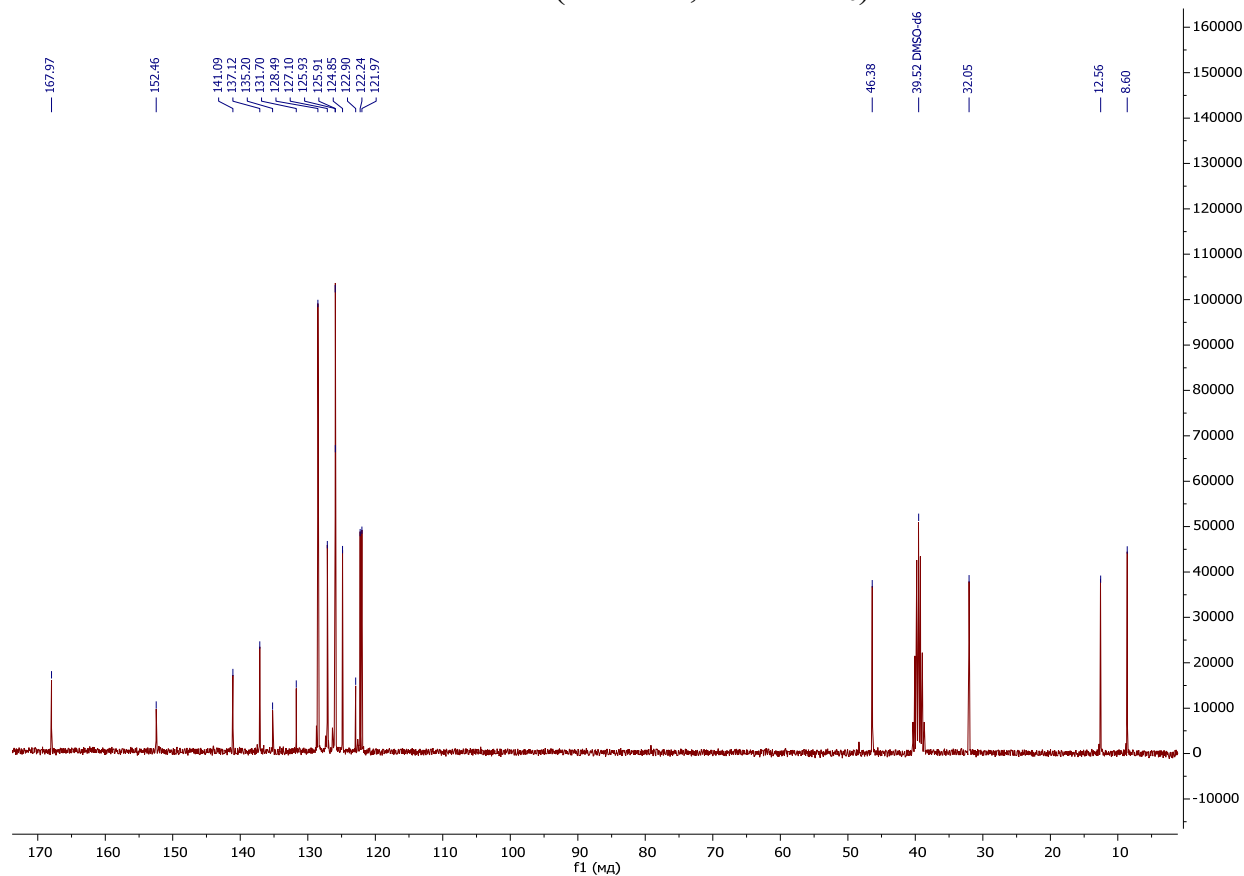

2-((1-Benzyl-4,5-dimethyl-1H-imidazol-2-yl)methyl)-1H-benzo[d]imidazole (**6v**)  
<sup>1</sup>H NMR (400 MHz, DMSO-*d*<sub>6</sub>)

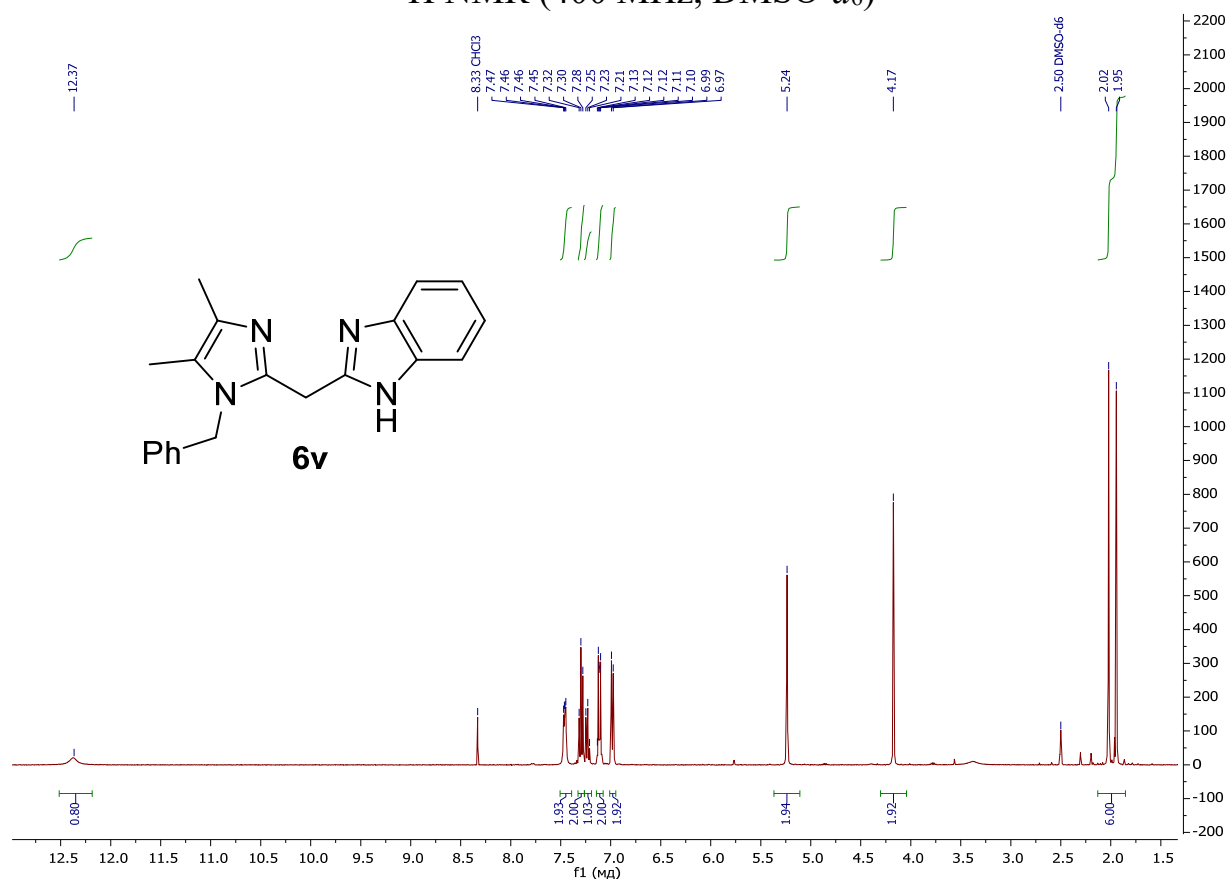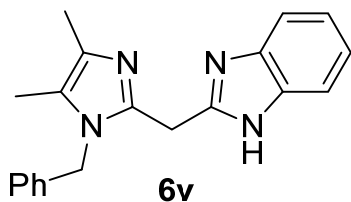

<sup>13</sup>C NMR (75 MHz, DMSO-*d*<sub>6</sub>)

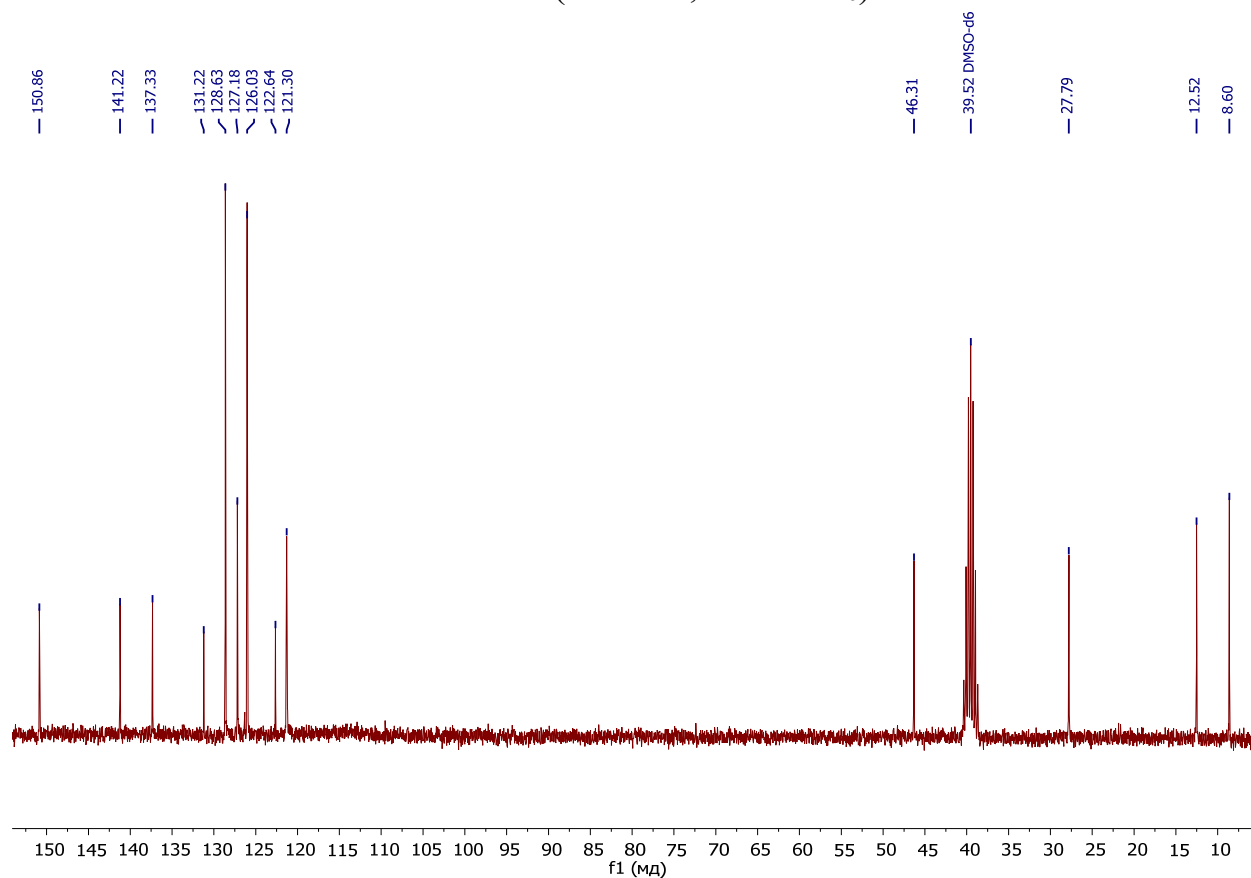



## X-ray diffraction data

Single crystals of **5e** and **5o** were grown from DMF. Data collection for samples **5e** and **5o** were performed on a Bruker SMART APEX II diffractometer equipped with a Photon-II area-detector and a graphite monochromator for MoK $\alpha$  radiation ( $\lambda = 0.71073 \text{ \AA}$ , phi and omega scans). Frames were integrated using the Bruker SAINT software package<sup>[1]</sup> by a narrow-frame algorithm. A semiempirical absorption correction was applied with the SADABS<sup>[2]</sup> program using the intensity data of equivalent reflections. The structures were solved with a dual-space method with SHELXT program<sup>[3]</sup> and refined by the full-matrix least-squares technique against  $F^2_{\text{hkl}}$  in anisotropic approximation for non-hydrogen atoms with SHELXL<sup>[4]</sup> program. Hydrogen atoms connected to nitrogen atoms were found from difference Fourier synthesis and refined isotropically. Other H atoms were placed in calculated positions and refined in the riding model with  $U_{\text{iso}}(\text{H}) = 1.5U_{\text{eq}}(\text{C}_m)$  for methyl groups and  $1.2U_{\text{eq}}(\text{C}_i)$  for other carbon atoms to which corresponding H atoms are bonded.

Detailed crystallographic information is given in Table S1. Deposition Numbers 2093521-2093522 contain the supplementary crystallographic data for this paper. These data are provided free of charge by the joint Cambridge Crystallographic Data Centre and Fachinformationszentrum Karlsruhe Access Structures service [www.ccdc.cam.ac.uk/structures](http://www.ccdc.cam.ac.uk/structures).

1. Bruker, SAINT v8.40B, 2019.
2. Krause, L.; Herbst-Irmer, R.; Sheldrick, G. M.; Stalke, D. Comparison of silver and molybdenum microfocus X-ray sources for single-crystal structure determination. *J. Appl. Cryst.* **2015**, 48, 3–10.  
<http://doi.org/10.1107/S1600576714022985>
3. Sheldrick, G. M. SHELXT - Integrated space-group and crystal-structure determination. *Acta Cryst.* **2015**, A71, 3-8.  
<http://doi.org/10.1107/S2053273314026370>
4. Sheldrick, G. M. Crystal structure refinement with SHELXL. *Acta Cryst.* **2015**, C71, 3-8.  
<http://doi.org/10.1107/S2053229614024218>

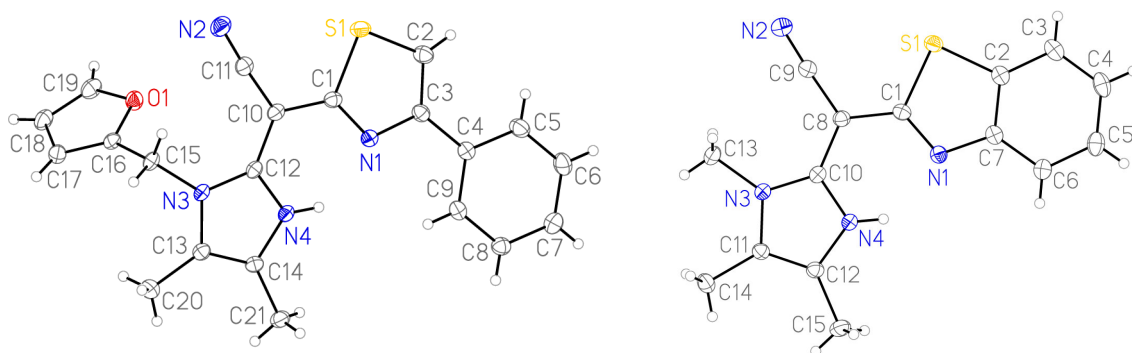

**Figure S1.** General view of crystal structures of **5e** and **5o** in thermal ellipsoid representation for non-hydrogen atoms ( $p=50\%$ ).

**Table S1.** Crystal data and structure refinement for **5e** and **5o**.

|                                                                                            | <b>5e</b>                      | <b>5o</b>                      |
|--------------------------------------------------------------------------------------------|--------------------------------|--------------------------------|
| CCDC number                                                                                | 2093522                        | 2093521                        |
| Empirical formula                                                                          | $C_{21}H_{18}N_4OS$            | $C_{15}H_{14}N_4S$             |
| Formula weight                                                                             | 374.45                         | 282.36                         |
| T, K                                                                                       | 120                            | 120                            |
| Crystal dimensions, mm                                                                     | $0.26 \times 0.20 \times 0.18$ | $0.30 \times 0.21 \times 0.17$ |
| Crystal system                                                                             | Monoclinic                     | Monoclinic                     |
| Space group                                                                                | $P2_1/n$                       | $P2_1/n$                       |
| $Z / Z'$                                                                                   | 4 / 1                          | 4 / 1                          |
| $a$ , Å                                                                                    | 12.1703(4)                     | 8.3093(4)                      |
| $b$ , Å                                                                                    | 8.7069(3)                      | 7.7536(3)                      |
| $c$ , Å                                                                                    | 17.7917(6)                     | 21.1019(9)                     |
| $\beta$ , °                                                                                | 104.923(2)                     | 94.235(2)                      |
| $V$ , Å <sup>3</sup>                                                                       | 1821.72(11)                    | 1355.82(10)                    |
| $d_{\text{calc}}$ , g cm <sup>-3</sup>                                                     | 1.365                          | 1.383                          |
| $\mu$ , cm <sup>-1</sup>                                                                   | 1.97                           | 2.34                           |
| $2\theta_{\text{max}}$ , °                                                                 | 61.05                          | 61.05                          |
| Refls collected                                                                            | 24031                          | 17592                          |
| Independent refls [ $R_{\text{int}}$ ]                                                     | 5572 [0.0385]                  | 4117 [0.0257]                  |
| Observed reflections [ $I > 2\sigma(I)$ ]                                                  | 4240                           | 3525                           |
| Parameters                                                                                 | 250                            | 188                            |
| $R1$                                                                                       | 0.0386                         | 0.0341                         |
| $wR2$                                                                                      | 0.1076                         | 0.1001                         |
| GOF                                                                                        | 1.038                          | 1.030                          |
| Residual density, $\Delta\rho_{\text{max}} / \Delta\rho_{\text{min}}$ (e Å <sup>-3</sup> ) | 0.312/-0.336                   | 0.381/-0.369                   |
